# Supplementary material for: NeuroBlu, an electronic health record (EHR) trusted research environment (TRE) to support mental healthcare analytics with real-world data
Source: HighWire-hosted journal article supplement (doi:10.1136/bmjopen-2021-057227), 2022-04-01

## Online supplementary material

# Cohort profile: NeuroBlu, an Electronic Health Record (EHR) Trusted Research Environment (TRE) to support mental healthcare real-world data analytics

## Table of contents

|                                                                                   |    |
|-----------------------------------------------------------------------------------|----|
| Table of contents .....                                                           | 1  |
| 1. NeuroBlu Common Data Model (CDM) pipeline .....                                | 3  |
| (i) Structural Normalization .....                                                | 3  |
| (ii) Semantic Normalization .....                                                 | 4  |
| (iii) Data Validation .....                                                       | 4  |
| 2. Data variables .....                                                           | 5  |
| (i) Clinical Data Tables.....                                                     | 5  |
| person .....                                                                      | 6  |
| observation_period .....                                                          | 8  |
| visit_occurrence.....                                                             | 9  |
| condition_occurrence.....                                                         | 10 |
| drug_exposure.....                                                                | 11 |
| measurement .....                                                                 | 12 |
| observation .....                                                                 | 14 |
| (ii) Family History .....                                                         | 17 |
| (iii) Derived Measurements .....                                                  | 18 |
| (iv) Mental State Examination .....                                               | 23 |
| eTable 1: Description of U.S. clinics contributing EHR data to NeuroBlu .....     | 31 |
| eTable 2: NeuroBlu dataset race distribution.....                                 | 32 |
| eTable 3: NeuroBlu dataset age distribution.....                                  | 32 |
| eTable 4: NeuroBlu dataset diagnosis distribution.....                            | 32 |
| eTable 5: Gender distribution by diagnosis .....                                  | 33 |
| eTable 6: ICD-9/ICD-10 code definitions for diagnostic category.....              | 34 |
| eTable 7: U.S. State of Residence .....                                           | 65 |
| eTable 8: Mean CGI-S score by diagnosis .....                                     | 67 |
| eTable 9: Mean maximum and minimum CGI-S score by diagnosis.....                  | 68 |
| eTable 10: Number of patients with at least one hospital visit by diagnosis ..... | 69 |
| eTable 11: SAV features included in MSE NLP analysis (eTable 12) .....            | 70 |
| eTable 12: Number of patients with at least one MSE feature by diagnosis.....     | 71 |
| eFigure 1: MindLinc EHR data de-identification and harmonization pipeline .....   | 72 |

**Online supplementary material**

|                                                                                                                                       |    |
|---------------------------------------------------------------------------------------------------------------------------------------|----|
| eFigure 2: OMOP CDM schematic .....                                                                                                   | 73 |
| eFigure 3: NeuroBlu Category Mapper illustrating the classification of individual drugs into different types of medication .....      | 74 |
| eFigure 4: NeuroBlu Data Explorer which provides a summary of the dataset and allows the top 50 rows of each table to be viewed ..... | 75 |
| eFigure 5: NeuroBlu dataset race distribution .....                                                                                   | 76 |
| eFigure 6: NeuroBlu dataset age distribution.....                                                                                     | 77 |
| eFigure 7: Gender distribution by diagnosis.....                                                                                      | 78 |
| eFigure 8: U.S. State of Residence.....                                                                                               | 79 |
| eFigure 9: Mean CGI-S score by diagnosis.....                                                                                         | 80 |
| eFigure 10: Percentage of patients with at least one hospital visit by diagnosis.....                                                 | 81 |
| eFigure 11: Distribution of number of visits per patient .....                                                                        | 82 |
| eFigure 12: Distribution of duration of follow-up .....                                                                               | 83 |

## Online supplementary material

### 1. NeuroBlu Common Data Model (CDM) pipeline

The NeuroBlu Data Model is based on the Observational Medical Outcomes Partnership (OMOP) Common Data Model (CDM) developed by the Observation Health Data Sciences and Informatics (OHDSI) community (eFigure 1). The model enables data contained within disparate observational databases to be transformed into a common format (the “data model”) as well as a common representation (terminologies, vocabularies, coding schemes). This allows systematic analyses to be performed using a library of standard analytical routines that have been written based on the OMOP CDM.

The NeuroBlu Data Model includes the following modifications of the OMOP CDM to better support the representation of mental healthcare data:

1. Representing ICD-9/ICD-10 diagnostic codes in the `CONDITION_OCCURRENCE` table rather than the specified SNOMED concepts, as users typically have more familiarity with the ICD code sets than the SNOMED code set.
2. Adding the current value of mutable demographic attributes such as marital status, education, and occupation to the `PERSON` to allow users to access this information without needing to join a separate table.
3. Adding custom tables to support derived data and other data elements that do not have a natural home in the OMOP CDM. This includes derived measurements like smoothed CGI-S scores, imputed MADRS scores, and Mental State Examination (MSE) data obtained through natural language processing (NLP).

Once the MindLinc data are deidentified, transferred, and loaded into the relational PostgreSQL database, the remaining data integration processes required to ensure the data are ready for analysis within the NeuroBlu dataset include structural normalization, semantic normalization, and data validation.

#### (i) Structural Normalization

Structural normalization is the process of transforming the data into a single schema or layout. For example, to examine patient demographic information in a consistent way, regardless of how it was stored in the originating EHRs, the various patient and member demographic data are organized into a single, commonly structured `PERSON` table. This requires establishing and implementing various transformation rules that get applied to the data, such as those described below:

1. **Source-to-Target Mapping Logic:** this refers to the conveyance of information from a specific place in the source data to its related place in the target data model. For example, the MindLinc EHR source data contains a `BACKGROUND` table to record patient demographic attributes, such as `RACE` and `SEX`. In order for these attributes to end up in the appropriate place in the NeuroBlu Data Model, they need to be mapped from the relevant source field to the associated target field. In this example, the information in `RACE` and `SEX` MindLinc database would end up in the `RACE_SOURCE_VALUE` and `GENDER_SOURCE_VALUE` fields of the `PERSON` table in the NeuroBlu database.
2. **Inclusion/Exclusion Logic:** this refers to the criteria applied to the data in order for them to be included in the NeuroBlu Data Model. For example, information from the MindLinc source data that is marked as “entered in error” or “erroneous” brings into question whether it is truly evidence from real world data and in turn is excluded from the NeuroBlu Data Model.

### Online supplementary material

- 3. De-duplication Logic:** this refers to the removal of duplicative or outdated information, such that only up-to-date data are pulled into the NeuroBlu Data Model and are only pulled in once. Depending on the source data elements of interest and the mechanism by which updates are applied to them, the method for de-duplication will vary. In the case of the MindLinc data, a destructive refresh approach is taken across all data tables such that the most recently acquired data will always replace the older data.

#### (ii) Semantic Normalization

Semantic normalization is the process of translating the data to a single set of units and vocabulary. For example, in order to specifically examine female patients in the aforementioned PERSON table, the various ways the patient and member demographic data codify the concept of “female” need to be examined such that a translation between the source codes (e.g. “F”, “FEM”, “FEMALE”, “0”, “396123”, etc.) and the NeuroBlu standard concept (“FEMALE”) can be created and applied to the data. These translations are generated through a combination of direct-mapping, text-string-matching, and NLP based on a thorough examination of the native codes, their descriptions, any supporting information provided about them (e.g. reference ranges for scores, generic name for medications, etc.), and, if necessary, expert input from the healthcare provider organization they are originating from.

A number of industry standard reference code sets are leveraged as part of the semantic normalization process for the MindLinc data, including RxNorm for drug mapping and ICD-9/ICD-10 for diagnostic code mapping. The target concept sets for all normalized data elements are the Standardized Vocabulary provided as part of the OMOP CDM standard.

#### (iii) Data Validation

A core component of data acquisition and integration is ensuring that the resultant data set is of the highest quality possible, where quality is defined as a function of conformance, completeness, correctness, and consistency. In order to measure the quality of newly integrated data against these key dimensions, the NeuroBlu CDM pipeline employs an approach to data validation that uses the wealth of data available during the process to produce a composite measure of what certain key data points typically look like in different situations, and then evaluates the data against these expectations. Doing this efficiently requires validation of the data as they flow through the processing pipeline, which in turn necessitates a robust strategy for determining key quality indication metrics, generating those metrics in a systematic manner, and distilling those metrics into meaningful insights.

The Data Validation process works in concert with the above normalization processes to identify issues or inconsistencies in the data that need to be addressed and provide guidelines on how those various issues or inconsistencies should be handled. Erroneous data that can't be fixed at the source are either remedied or removed by NeuroBlu's Extract, Transform, Load (ETL) processes, while quirks or unexpected features of the data that are not necessarily errors are systematically logged.

The end result of these data integration processes is the creation of a single normalized and validated Common Data Model for use in the NeuroBlu trusted research environment.

### Online supplementary material

## 2. Data variables

### (i) Clinical Data Tables

The clinical data tables contain the core information about the clinical events that occurred longitudinally during valid Observation Periods for each person, as well as demographic information for the person. In addition to the standardized clinical data tables defined in the OMOP CDM, the NeuroBlu dataset also contains other tables that are not defined in the OMOP CDM including data on Family History, Derived Measurements and Mental State Examination and which are described in greater detail in sections (ii), (iii) and (iv). The tables form part of a relational database in which “\_id” columns may be joined between tables to assemble clinical data at individual person level.

| Table name                                                                                       | Type    | Content                                                                                                                                                                                                                                                    |
|--------------------------------------------------------------------------------------------------|---------|------------------------------------------------------------------------------------------------------------------------------------------------------------------------------------------------------------------------------------------------------------|
| person                                                                                           | CDM     | Socio-demographic information of each patient including year of birth, gender, race, location of residence, occupational status and education status.                                                                                                      |
| observation_period                                                                               | CDM     | Time interval for which a patient has data recorded. Data from this table is used to filter cohorts according to minimum duration within the dataset to support longitudinal analyses.                                                                     |
| visit_occurrence                                                                                 | CDM     | Records of each visit and its type. Data may be obtained from this table on the number of contacts with the treating mental healthcare service and the type of contact (e.g. outpatient or inpatient).                                                     |
| condition_occurrence                                                                             | CDM     | Records of clinical diagnosis in the form of ICD-9-CM and ICD-10-CM codes. Data from this table is used to generate population cohorts based on primary mental disorder diagnosis and to obtain data on comorbid diagnoses.                                |
| drug_exposure                                                                                    | CDM     | Records of any exposure to prescribed medications including the names of prescribed medications, start and stop dates, dose and frequency of administration.                                                                                               |
| measurement                                                                                      | CDM     | Records of direct clinical measurements using clinician-rated structured rating scales.                                                                                                                                                                    |
| observation                                                                                      | CDM     | NLP-derived records of social factors which could contribute towards risk of developing a mental disorder and/or poorer clinical outcomes. This table can also be used to obtain social factor data as outcomes (e.g. social and occupational functioning) |
| family_history                                                                                   | Non-CDM | Provides recorded data on family history of mental disorders                                                                                                                                                                                               |
| derived_measurement                                                                              | Non-CDM | Clinical measurements which have been transformed or derived from recorded CGI-S scores.                                                                                                                                                                   |
| derived_mse                                                                                      | Non-CDM | NLP-derived mental state examination (MSE) data.                                                                                                                                                                                                           |
| CDM: OMOP Common Data Model<br>Non-CDM: NeuroBlu customized data structure (not defined in OMOP) |         |                                                                                                                                                                                                                                                            |

### Online supplementary material

#### person

The person table contains records that uniquely identify each person in the dataset. This table also contains demographic information about each individual (excluding data removed by the de-identification process). All other clinical data tables refer to this table using the person\_id field which is the unique record identifier for each individual represented in the dataset.

#### Columns

| Field                  | Type    | Description                                                                                                                                                                                                        |
|------------------------|---------|--------------------------------------------------------------------------------------------------------------------------------------------------------------------------------------------------------------------|
| person_id              | int8    | A unique identifier for each person. This value is used to join onto other tables in NeuroBlu to obtain clinical data at individual person level.                                                                  |
| gender_concept_id      | int4    | A foreign key that refers to an identifier in the concept table for the unique gender of the person, belonging to the 'Gender' Vocabulary. Gender data are obtained by joining on this value (see below).          |
| year_of_birth          | int4    | The year of birth of the person.                                                                                                                                                                                   |
| race_concept_id        | int4    | A foreign key that refers to an identifier in the concept table for the unique race of the person, belonging to the 'Race' Vocabulary. Race data are obtained by joining on this value (see below).                |
| ethnicity_concept_id   | int4    | A foreign key that refers to an identifier in the concept table for the unique ethnicity of the person, belonging to the 'Ethnicity' Vocabulary. Ethnicity data are obtained by joining on this value (see below). |
| zip_code_source_value  | varchar | 3-digit ZIP code of the person's location.                                                                                                                                                                         |
| city                   | varchar | City name based on 3-digit ZIP code.                                                                                                                                                                               |
| state                  | varchar | State name based on 3-digit ZIP code.                                                                                                                                                                              |
| marital_status         | varchar | Marital status of the person.                                                                                                                                                                                      |
| occupation             | varchar | Employment status of the person.                                                                                                                                                                                   |
| education              | int2    | Number of years of formal education. When education_source_value is not available, defaults to 0                                                                                                                   |
| education_source_value | varchar | Source value for education. Not always available.                                                                                                                                                                  |

#### Conventions

| No. | Convention Description                                                                                                                                                                                                                                                                                   |
|-----|----------------------------------------------------------------------------------------------------------------------------------------------------------------------------------------------------------------------------------------------------------------------------------------------------------|
| 1   | All tables representing patient-related domains have a foreign-key reference to the person_id field in the person table.                                                                                                                                                                                 |
| 2   | Each person record has associated demographic attributes which are assumed to be constant for the patient throughout the course of their periods of observation. For example, the location or gender is expected to have a unique value per person, even though in life these data may change over time. |
| 3   | The month and day of birth for a person is not recorded. Therefore, value defaults to Jan 1st.                                                                                                                                                                                                           |
| 4   | Ethnicity and Race in the OMOP CDM follow the 1997 Office of Management and Budget (OMB) standards for data on race and ethnicity.                                                                                                                                                                       |

## Online supplementary material

## Gender Vocabulary

| concept_id | concept_name |
|------------|--------------|
| 8507       | MALE         |
| 8532       | FEMALE       |
| 8551       | UNKNOWN      |

## Race Vocabulary

| concept_id | concept_name                              |
|------------|-------------------------------------------|
| 8515       | Asian                                     |
| 8516       | Black or African American                 |
| 8522       | Other Race                                |
| 8527       | White                                     |
| 8552       | Unknown                                   |
| 8557       | Native Hawaiian or Other Pacific Islander |
| 8657       | American Indian or Alaska Native          |

## Ethnicity Vocabulary

| concept_id | concept_name           |
|------------|------------------------|
| 759814     | Ethnic group unknown   |
| 38003563   | Hispanic or Latino     |
| 38003564   | Not Hispanic or Latino |

## Marital Status Vocabulary

| marital_status  |
|-----------------|
| death of spouse |
| divorced        |
| engaged         |
| married         |
| separated       |
| single          |
| together        |
| unknown         |

## Occupation Vocabulary

| occupation |
|------------|
| Disabled   |
| Employed   |
| Retired    |
| Student    |
| Unemployed |
| Unknown    |

### Online supplementary material

#### *observation\_period*

The observation\_period table contains records which uniquely define the spans of time for which a patient is expected to have clinical events recorded within the source systems, even if no events in fact are recorded (healthy patient with no healthcare interactions).

#### Columns

| Field                         | Type   | Description                                                                                                                                                                                     |
|-------------------------------|--------|-------------------------------------------------------------------------------------------------------------------------------------------------------------------------------------------------|
| observation_period_id         | serial | A unique identifier for each observation period.                                                                                                                                                |
| person_id                     | int8   | A foreign key identifier to the person for whom the observation period is defined. The demographic details of that person are stored in the person table.                                       |
| observation_period_start_date | date   | The start date of the observation period for which data are available from the data source.                                                                                                     |
| observation_period_end_date   | date   | The end date of the observation period for which data are available from the data source.                                                                                                       |
| period_type_concept_id        | int4   | A foreign key identifier to the predefined Concept in the Standardized Vocabularies reflecting the source of the observation period information, belonging to the 'Obs Period Type' Vocabulary. |

#### Conventions

| No. | Convention Description                                                                                                                                                                                                                                                                                                  |
|-----|-------------------------------------------------------------------------------------------------------------------------------------------------------------------------------------------------------------------------------------------------------------------------------------------------------------------------|
| 1   | Each person has to have at least one observation period.                                                                                                                                                                                                                                                                |
| 2   | One person may have one or more disjoint observation periods, during which times analyses may assume that clinical events would be captured if observed.                                                                                                                                                                |
| 3   | Each person can have more than one valid observation period record, but no two observation periods can overlap in time for a given person.                                                                                                                                                                              |
| 4   | As a general assumption, during an observation period any clinical event that happens to the patient is expected to be recorded. Conversely, the absence of data indicates that no clinical events occurred to the patient.                                                                                             |
| 5   | Both the start date and the end date of the clinical event has to be between observation_period_start_date and observation_period_end_date.                                                                                                                                                                             |
| 6   | For EHR data, the observation period cannot be determined explicitly, because patients usually do not announce their departure from a certain healthcare provider. The extract, transform, load (ETL) process will have to apply some heuristic to make a reasonable estimate on what the observation_period should be. |



### Online supplementary material

#### [visit\\_occurrence](#)

The visit\_occurrence table contains the spans of time a patient continuously receives medical services from one or more providers at a care site in a given setting within the health care system.

#### Columns

| Field                 | Type      | Description                                                                                                                                                                                                                                                              |
|-----------------------|-----------|--------------------------------------------------------------------------------------------------------------------------------------------------------------------------------------------------------------------------------------------------------------------------|
| visit_occurrence_id   | int8      | A unique identifier for each person's visit or encounter at a healthcare provider.                                                                                                                                                                                       |
| person_id             | int8      | A foreign key identifier to the person for whom the visit is recorded. The demographic details of that person are stored in the person table.                                                                                                                            |
| visit_concept_id      | int4      | A foreign key that refers to an identifier in the Standardized Vocabularies belonging to the 'Visit' Domain.                                                                                                                                                             |
| visit_start_datetime  | timestamp | The date and time when the visit started. The time is not captured in the source and defaults to 00:00:00.                                                                                                                                                               |
| visit_end_datetime    | timestamp | The date and time when the visit ended. Not recorded in the source. Takes the same value as visit_start_datetime.                                                                                                                                                        |
| visit_type_concept_id | int4      | A foreign key identifier to the predefined Concept in the Standardized Vocabularies reflecting the source data from which the visit record is derived from, belonging to the 'Visit Type' Vocabulary. Visit type data are obtained by joining on this value (see below). |
| provider_id           | int8      | A foreign key to the primary care provider the person is seeing.                                                                                                                                                                                                         |
| care_site_id          | int8      | A foreign key to the site of primary care.                                                                                                                                                                                                                               |
| visit_source_value    | varchar   | Source value for visit_concept_id.                                                                                                                                                                                                                                       |

#### Conventions

| No. | Convention Description                                                                                                                                                                         |
|-----|------------------------------------------------------------------------------------------------------------------------------------------------------------------------------------------------|
| 1   | A visit occurrence is recorded for each engagement of a patient with the healthcare system. It reflects any interaction with the healthcare service, not just in person clinical interactions. |
| 2   | Valid Visit Concepts belong to the 'Visit' domain.                                                                                                                                             |
| 3   | At any one day, there could be more than one visit.                                                                                                                                            |
| 4   | Visit times and visit end dates are not captured in the source. They resort to 00:00:00 and visit start dates, respectively.                                                                   |

#### Visit types

The table below describes the different visit types documented in the visit\_occurrence table.

| concept_id | concept_name                       |
|------------|------------------------------------|
| 262        | Emergency Room and Inpatient Visit |
| 9201       | Inpatient Visit                    |
| 9202       | Outpatient Visit                   |
| 32693      | Health examination                 |
| 581458     | Pharmacy visit                     |
| 581477     | Office Visit                       |
| 42898160   | Non-hospital institution Visit     |

### Online supplementary material

#### *condition\_occurrence*

The condition\_occurrence table contains the presence of a disease or medical condition recorded as a diagnosis according to the International Classification of Disease (ICD), which is either observed by a provider or reported by the patient. In the NeuroBlu dataset, diagnoses are recorded as ICD-9-CM and ICD-10-CM codes in the source.

#### Columns

| Field                    | Type         | Description                                                                                                                                                                                              |
|--------------------------|--------------|----------------------------------------------------------------------------------------------------------------------------------------------------------------------------------------------------------|
| condition_occurrence_id  | serial       | A unique identifier for each condition occurrence event.                                                                                                                                                 |
| person_id                | int8         | A foreign key identifier to the person for whom the condition is recorded. The demographic details of that person are stored in the person table.                                                        |
| condition_concept_id     | int4         | A foreign key that refers to an identifier in the Standardized Vocabularies belonging to the 'Condition' Domain. Joining on this value extracts the corresponding ICD-9-CM or ICD-10-CM diagnostic code. |
| condition_start_datetime | timestamp    | The date and time when the instance of the condition is recorded. The time is not captured in the source and defaults to 00:00:00.                                                                       |
| provider_id              | int8         | A foreign key to the primary care provider the person is seeing.                                                                                                                                         |
| visit_occurrence_id      | int8         | A foreign key to the visit in the visit_occurrence table during which the condition was diagnosed.                                                                                                       |
| condition_source_value   | varchar(255) | Source value for condition_concept_id.                                                                                                                                                                   |

#### Conventions

| No. | Convention Description                                                                                                                                                              |
|-----|-------------------------------------------------------------------------------------------------------------------------------------------------------------------------------------|
| 1   | Past diagnoses ('history of') are not recorded in the condition_occurrence table. Instead, they are listed in the observation table.                                                |
| 2   | The exact start date and end date for a condition is not recorded explicitly. Rather, the start date contains the date when the diagnosis was made, and the end date is left empty. |

### Online supplementary material

#### *drug\_exposure*

The *drug\_exposure* table contains records about the utilization of a prescribed medication when ingested or introduced to the body. Prescribed medications are inferred from clinical events associated with orders, prescriptions written, pharmacy dispensing, procedural administrations, and other patient-reported information.

#### Columns

| Field                        | Type        | Description                                                                                                                                                                                                                                                                                       |
|------------------------------|-------------|---------------------------------------------------------------------------------------------------------------------------------------------------------------------------------------------------------------------------------------------------------------------------------------------------|
| drug_exposure_id             | serial      | A unique identifier for each condition exposure event.                                                                                                                                                                                                                                            |
| person_id                    | int8        | A foreign key identifier to the person for who is subjected to the drug. The demographic details of that person are stored in the person table.                                                                                                                                                   |
| drug_concept_id              | int4        | A foreign key that refers to an identifier in the Standardized Vocabularies belonging to the 'Drug' Domain. Joining on this value extracts the name of the prescribed medication.                                                                                                                 |
| drug_exposure_start_datetime | timestamp   | The start date and time for the current instance of drug utilization. Valid entries include a start date of a prescription or the date on which a drug was administered. The time is not captured in the source and defaults to 00:00:00.                                                         |
| drug_exposure_end_datetime   | timestamp   | The end date and time for the current instance of drug utilization. It could be a known or an inferred date and denotes the last day at which the patient was still exposed to the drug during an instance of drug utilization.. The time is not captured in the source and defaults to 00:00:00. |
| quantity                     | numeric     | Total quantity of drug exposed, in mg. Not always available.                                                                                                                                                                                                                                      |
| days_supply                  | int4        | The number of days of drug exposure. Not always available.                                                                                                                                                                                                                                        |
| provider_id                  | int8        | A foreign key to the primary care provider the person is seeing.                                                                                                                                                                                                                                  |
| visit_occurrence_id          | int8        | A foreign key to the visit in the visit_occurrence table during which the drug exposure was initiated.                                                                                                                                                                                            |
| drug_source_value            | varchar(50) | Source value for drug_concept_id.                                                                                                                                                                                                                                                                 |

#### Conventions

| No. | Convention Description                                                                                                                             |
|-----|----------------------------------------------------------------------------------------------------------------------------------------------------|
| 1   | Valid Concepts for the drug_concept_id field belong to the 'Drug' domain. They are based on Ingredient Concept Class within the RxNorm Vocabulary. |

### Online supplementary material

#### *measurement*

The measurement table contains records of structured values (numerical or categorical) obtained through systematic and standardized examination or testing of a person. In the NeuroBlu dataset, the table contains measurements of:

1. Clinical Global Impression - Severity (CGI-S)
2. Clinical Global Impression - Improvement (CGI-I)
3. Global Assessment of Functioning (GAF)
4. Montgomery-Asberg Depression Rating Scale (MADRS)

#### Columns

| Field                         | Type      | Description                                                                                                                                                                                                                                                   |
|-------------------------------|-----------|---------------------------------------------------------------------------------------------------------------------------------------------------------------------------------------------------------------------------------------------------------------|
| measurement_id                | serial    | A unique identifier for each measurement.                                                                                                                                                                                                                     |
| person_id                     | int8      | A foreign key identifier to the person for whom the measurement is recorded. The demographic details of that person are stored in the person table.                                                                                                           |
| measurement_concept_id        | int4      | A foreign key that refers to an identifier in the Standardized Vocabularies. Joining on this value specified which clinical measurement is being recorded.                                                                                                    |
| measurement_datetime          | timestamp | The date and time of the measurement. The time is not captured in the source and defaults to 00: 00: 00.                                                                                                                                                      |
| measurement_type_concept_id   | int4      | A foreign key to the predefined Concept in the Standardized Vocabularies reflecting the provenance from where the Measurement record was recorded. These belong to the 'Meas Type' vocabulary.                                                                |
| operator_concept_id           | int4      | A foreign key identifier to the predefined Concept in the Standardized Vocabularies reflecting the mathematical operator that is applied to the value_as_number. Operators are <, <=, =, >=, > and these concepts belong to the 'Meas Value Operator' domain. |
| value_as_number               | numeric   | A measurement result where the result is expressed as a numeric value.                                                                                                                                                                                        |
| provider_id                   | int8      | A foreign key to the primary care provider the person is seeing.                                                                                                                                                                                              |
| visit_occurrence_id           | int8      | A foreign key to the visit in the visit_occurrence table during which the measurement was recorded.                                                                                                                                                           |
| measurement_source_value      | varchar   | Source value for measurement_concept_id.                                                                                                                                                                                                                      |
| measurement_source_concept_id | int4      | A foreign key to a Concept in the Standardized Vocabularies that refers to the code used in the source.                                                                                                                                                       |
| unit_source_value             | varchar   | Source value for the unit.                                                                                                                                                                                                                                    |
| value_source_value            | varchar   | Source value associated with value_as_number column.                                                                                                                                                                                                          |

**Online supplementary material**

|             |         |                                                               |
|-------------|---------|---------------------------------------------------------------|
| custom2_str | varchar | Custom field to indicate which measurement the record is for. |
|-------------|---------|---------------------------------------------------------------|

**Conventions**

| No. | Convention Description                                                                                                                                                                                                                                               |
|-----|----------------------------------------------------------------------------------------------------------------------------------------------------------------------------------------------------------------------------------------------------------------------|
| 1   | Measurements are stored as attribute value pairs, with the attribute as the <code>measurement_concept_id</code> and the value representing the result ( <code>value_as_number</code> ).                                                                              |
| 2   | The <code>operator_concept_id</code> is optionally given for relative Measurements where the precise value is not available but its relation to a certain benchmarking value is available. For example, this can be used for minimal detection thresholds of a test. |

### Online supplementary material

#### *observation*

The observation table contains records of clinical facts about a related to medical history, the stated need for certain treatment, social circumstances, lifestyle choices, healthcare utilization patterns, etc. These records are obtained during examination or procedure and differ from Measurements in that they do not require a standardized test to generate clinical fact.

In NeuroBlu, the observation table contains the social history in the form of external environmental stressors.

#### Columns

| Field                       | Type         | Description                                                                                                                                                                                                                                             |
|-----------------------------|--------------|---------------------------------------------------------------------------------------------------------------------------------------------------------------------------------------------------------------------------------------------------------|
| observation_period_id       | serial       | A unique identifier for each observation.                                                                                                                                                                                                               |
| person_id                   | int8         | A foreign key identifier to the person for whom the observation period is defined. The demographic details of that person are stored in the person table.                                                                                               |
| observation_concept_id      | int4         | A foreign key that refers to an identifier in the Standardized Vocabularies.                                                                                                                                                                            |
| observation_datetime        | timestamp    | The date and time of the observation. The time is not captured in the source and defaults to 00: 00: 00.                                                                                                                                                |
| observation_type_concept_id | int4         | A foreign key to the predefined Concept in the Standardized Vocabularies reflecting the provenance from where the Observation record was recorded. These belong to the 'Observation Type' vocabulary.                                                   |
| value_as_string             | varchar(255) | Categorical value of the Result of the Observation, if applicable and available.                                                                                                                                                                        |
| value_as_concept_id         | int4         | A foreign key to an observation result stored as a Concept ID. This is applicable to observations where the result can be expressed as a Standard Concept from the Standardized Vocabularies (e.g., positive/negative, present/absent, low/high, etc.). |
| qualifier_concept_id        | int4         | Contains all attributes specifying the clinical fact further, such as degrees, severities, drug-drug interaction alerts                                                                                                                                 |
| visit_occurrence_id         | int8         | A foreign key to the visit in the visit_occurrence table during which the measurement was recorded.                                                                                                                                                     |
| observation_source_value    | varchar(255) | The observation code (Eg: ICD-10) as it appears in the source data.                                                                                                                                                                                     |
| qualifier_source_value      | varchar(50)  | The source value associated with a qualifier to characterize the observation.                                                                                                                                                                           |

### Online supplementary material

#### Conventions

| No. | Convention Description                                                                                                                           |
|-----|--------------------------------------------------------------------------------------------------------------------------------------------------|
| 1   | Observations can be stored as attribute value pairs, with the attribute as the Observation Concept and the value representing the clinical fact. |
| 2   | Valid Observation Concepts are not enforced to be from any domain though they still should be Standard Concepts.                                 |

#### External Stressors data derived using NLP

In the NeuroBlu dataset, the raw data for external environmental stressors (or social history) is a mixture of structured values and custom, user-defined free text. These values need to be normalized to structured values before they are used for downstream analytics. To achieve this, we have applied Natural Language Processing (NLP) to map the unstructured free text to structured labels.

The NLP model maps the semi-structured stessor data to one of the possible 61 labels (which can be categorized into 8 categories). Each label is also associated with a polarity (positive, negative or neutral) as described in the table below.

| Category    | Stressor Label                                                               | Polarity |
|-------------|------------------------------------------------------------------------------|----------|
| Academic    | Discord with teachers and classmates                                         | Negative |
| Academic    | Good achievement in school                                                   | Positive |
| Academic    | Illiteracy and low-level literacy                                            | Negative |
| Academic    | Suspension/expulsion                                                         | Negative |
| Academic    | Underachievement in school                                                   | Negative |
| Environment | Abusive environment at home                                                  | Negative |
| Environment | Chaotic atmosphere / stressful home environment                              | Negative |
| Environment | Cultural conflicts/issue                                                     | Negative |
| Environment | Exposure to Disaster, War, or Other Hostilities                              | Negative |
| Environment | Inadequate care (history from caregiver or patient)                          | Negative |
| Environment | Migration/ Acculturation Difficulty                                          | Negative |
| Environment | Problem Related to Living Alone                                              | Negative |
| Environment | Stable living situation                                                      | Positive |
| Family      | Anxiety about sick person in family, dependent relative needing care at home | Negative |
| Family      | Bereavement                                                                  | Negative |
| Family      | Disruption of Family by Separation or Divorce                                | Negative |
| Family      | Inadequate or distorted communication within family                          | Negative |
| Family      | Isolated family, lack of family support                                      | Negative |
| Family      | Legal problem in the family                                                  | Negative |
| Family      | Parenting situation                                                          | Negative |
| Family      | Problems in parent-child relationships and in-laws                           | Negative |
| Family      | Sibling Relational Problem                                                   | Negative |
| Family      | Substance abuse in the family                                                | Negative |
| Family      | Supportive family, love and respect in the family                            | Positive |
| Financial   | Extreme Poverty/ Low income                                                  | Negative |
| Financial   | Financial stability                                                          | Positive |
| Financial   | Inadequate health/social Insurance or Welfare Support                        | Negative |
| Financial   | Poor money management / no savings                                           | Negative |
| Financial   | Problems related to loan / creditors                                         | Negative |
| Housing     | Discord With Neighbor                                                        | Negative |

## Online supplementary material

|              |                                                       |          |
|--------------|-------------------------------------------------------|----------|
| Housing      | Homelessness                                          | Negative |
| Housing      | Inadequate housing                                    | Negative |
| Housing      | Isolated dwelling (Lack of transportation)            | Negative |
| Housing      | Unstable housing arrangement                          | Negative |
| Legal        | Arrest, Imprisonment and other incarceration          | Negative |
| Legal        | Child custody or support proceedings                  | Negative |
| Legal        | Litigation / legal proceedings                        | Negative |
| Legal        | Offense / charges                                     | Negative |
| Legal        | Problem with legal personnel                          | Negative |
| Legal        | Restrain order                                        | Negative |
| Occupational | Change of job                                         | Neutral  |
| Occupational | Fired                                                 | Negative |
| Occupational | Job dissatisfaction                                   | Negative |
| Occupational | Job satisfaction                                      | Positive |
| Occupational | Occupational stress                                   | Negative |
| Occupational | Threat of job loss, Underperform at work              | Negative |
| Occupational | Unemployment                                          | Negative |
| Occupational | Unstable job (changing jobs often)                    | Negative |
| Personal     | Emotional abuse                                       | Negative |
| Personal     | Involuntary treatment                                 | Negative |
| Personal     | Major life events                                     | Negative |
| Personal     | Physical abuse (spouse)                               | Negative |
| Personal     | Relationship Distress With Spouse or Intimate Partner | Negative |
| Personal     | Sense of meaning and support from belief              | Positive |
| Personal     | Sexual abuse (spouse)                                 | Negative |
| Personal     | Target of Adverse Discrimination                      | Negative |
| Personal     | Victim of crime                                       | Negative |
| Social       | Conflictual social relationships                      | Negative |
| Social       | Inadequate social support                             | Negative |
| Social       | Lack of social circles                                | Negative |
| Social       | Supportive friends                                    | Positive |

Precision statistics for the NLP classifiers provided as the median metrics of each stressor category are provided in the table below.

| Category     | AUROC | Recall | Precision | F1    |
|--------------|-------|--------|-----------|-------|
| Academic     | 0.999 | 0.667  | 1.000     | 0.800 |
| Environment  | 0.999 | 0.923  | 0.800     | 0.857 |
| Family       | 0.984 | 0.519  | 0.759     | 0.619 |
| Financial    | 0.998 | 0.500  | 0.833     | 0.667 |
| Housing      | 0.993 | 0.417  | 0.633     | 0.473 |
| Legal        | 0.985 | 0.708  | 0.813     | 0.745 |
| Occupational | 0.993 | 0.500  | 0.895     | 0.664 |
| Social       | 0.990 | 0.500  | 0.833     | 0.625 |



**Online supplementary material**

## (ii) Family History

The family\_history table contains data on recorded diagnoses of mental disorders affecting patients' relatives in the form of ICD-10-CM codes, along with the degree of relationship relative to the patient.

**Columns**

| <b>Field</b>           | <b>Type</b>  | <b>Description</b>                                                                                                                                                                                       |
|------------------------|--------------|----------------------------------------------------------------------------------------------------------------------------------------------------------------------------------------------------------|
| family_history_id      | serial       | A unique identifier for each family history record.                                                                                                                                                      |
| person_id              | int8         | A foreign key identifier to the person for whom the MSE is recorded. The demographic details of that person are stored in the person table.                                                              |
| visit_occurrence_id    | int8         | A foreign key to the visit in the visit_occurrence table during which the data was recorded.                                                                                                             |
| condition_concept_id   | int4         | A foreign key that refers to an identifier in the Standardized Vocabularies belonging to the 'Condition' Domain. Joining on this value extracts the corresponding ICD-9-CM or ICD-10-CM diagnostic code. |
| condition_source_value | varchar(255) | Source value for condition_concept_id.                                                                                                                                                                   |

### Online supplementary material

#### (iii) Derived Measurements

The derived\_measurement table contains records of structured values (numerical or categorical) obtained through deriving recorded measurements in the measurement table. In the NeuroBlu dataset, the table contains measurements of:

1. Smoothened CGI-S
2. Derived MADRS

#### Columns

| Field                     | Type         | Description                                                                                                                                           |
|---------------------------|--------------|-------------------------------------------------------------------------------------------------------------------------------------------------------|
| derived_measurement_id    | serial       | A unique identifier for each derived measurement.                                                                                                     |
| person_id                 | int8         | A foreign key identifier to the person for whom the measurement is recorded. The demographic details of that person are stored in the person table.   |
| derived_measurement_value | float4       | The value of the derived measurement.                                                                                                                 |
| derived_measurement_date  | date         | The date of the derived measurement.                                                                                                                  |
| range_low                 | numeric      | The lower limit of the normal range of the measurement result. The lower range is assumed to be of the same unit of measure as the measurement value. |
| range_high                | numeric      | The upper limit of the normal range of the measurement result. The upper range is assumed to be of the same unit of measure as the measurement value. |
| provider_id               | int8         | A foreign key to the primary care provider the person is seeing.                                                                                      |
| visit_occurrence_id       | int8         | A foreign key to the visit in the visit_occurrence table during which the measurement was recorded.                                                   |
| unit_source_value         | varchar(50)  | Source value for the unit.                                                                                                                            |
| custom2_str               | varchar(255) | Custom field to indicate which measurement the record is for (i.e. Derived MADRS or Smoothened CGI-S)                                                 |

#### Conventions

| No. | Convention Description                                                                                                                                     |
|-----|------------------------------------------------------------------------------------------------------------------------------------------------------------|
| 1   | Measurements are stored as attribute value pairs, with the attribute as the custom2_str and the value representing the result (derived_measurement_value). |

## Online supplementary material

## Smoothed CGI-S

In the NeuroBlu dataset, Clinical Global Impression-Severity (CGI-S) measurements are found to be noisy, both the severity and the improvement scales. The values recorded fluctuate across measurements. Sometimes a visit doesn't have any CGI-S measurement, and sometimes multiple CGI-S measurements are recorded in a single day.

To tackle this problem, we provide smoothed values of CGI-S. Raw measurement values are smoothed and interpolated on days with visit but no CGI-S measurements (the visit is recorded in `visit_occurrence`, but no CGI-S is measured on that day). These smoothed and interpolated values are available in the `derived_measurement` table.

The smoothing and interpolation is done on a per-patient basis using exponential-weighted smoothing, based on the following equation:

$$s_i = \sum_{j \in J} w_{i,j} c_j$$

$$w_{i,j} = \frac{\exp(-d_{i,j}^2 / (2\sigma^2))}{\sum_{j \in J} \exp(-d_{i,j}^2 / (2\sigma^2))}$$

where  $s_i$  is the smoothed CGI-S at visit  $i$ ,  $J$  is the set of all visits with CGI-S measurements,  $c_j$  is the measured raw CGI-S values at visit  $j$ ,  $d_{i,j}$  is the time difference between visit  $i$  and  $j$ , in terms of days, and  $\sigma$  is the smoothing parameter, equals to 5 in our case. The equation works for days with multiple CGI measurements and days without CGI-S measurements.

The following figure shows how the smoothed CGI-S looks for an example patient.

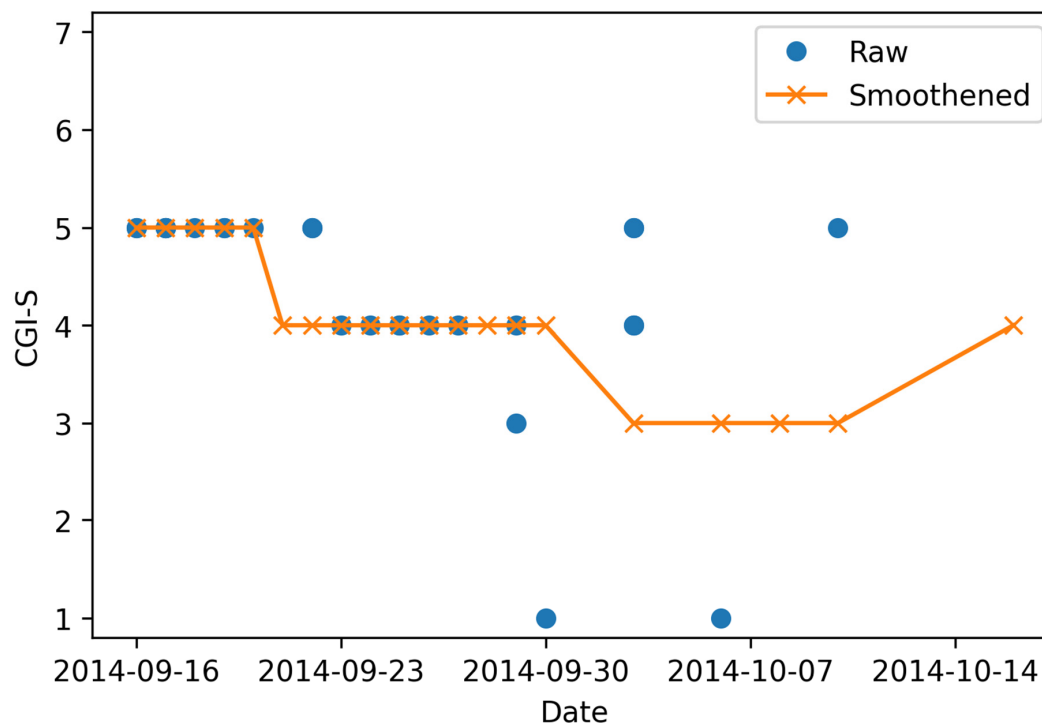

### Online supplementary material

#### MADRS Scores derived using CGI-S data

The Montgomery–Asberg Depression Rating Scale (MADRS) is a clinician-recorded rating scale for symptoms of depression. It comprises of 10 individual scores which are summed to yield a final score which ranges from 0 to 60. However, unlike the Clinical Global Impression-Severity (CGI-S), the NeuroBlu dataset has few documented records of MADRS scores. However, it is also one of the most widely used scores in psychiatry. We have observed that there is a fairly high correlation between the CGI-S and the final MADRS score. For this reason mapping functions have been derived that may be used to map the CGI-S score to the MADRS score.

In the event an analysis requires MADRS data, we provide values of MADRS derived from CGI-S at every timepoint with CGI-S measurement. These smoothed and interpolated values are available in the `derived_measurement` table.

All encounters in which both CGI-S and MADRS scores have been simultaneously measured are extracted from the dataset. In total, there are approximately 3101 such encounters. Both measurements are strongly correlated with a correlation coefficient of 0.80. This supports the possibility of mapping CGI-S to MADRS.

Upon manual inspection of the distribution of the MADRS scores for each value of CGI-S, we observed that MADRS scores have asymmetric distribution shapes for CGI-S values in the end of the spectrum, and wide distribution shapes for CGI-S values around the middle of the spectrum. For this reason, we feel that a simple linear model may not provide good confidence interval for the derived MADRS from CGI-S. We conclude that MADRS score follows the four-parameter beta distribution  $\text{Beta}(a, b, 0, 60)$ , where the parameters  $a, b$  is a function of the CGI-S score, and the value is bounded between 0 and 60. Then, the values of  $a, b$  are estimated for every possible value of CGI-S using the method of moments. The derived MADRS for each CGI-S score takes value of the distribution mean, i.e.  $60*a/(a+b)$ . To gauge the goodness-of-fit of this approach, the  $R^2$  value is computed and is found to be 0.66.

The estimated values of  $a$  and  $b$  along with the derived MADRS value for each CGI-S score are summarized in the following table.

| CGI-S | a      | b       | Derived MADRS | 95% confidence interval |
|-------|--------|---------|---------------|-------------------------|
| 1     | 0.1874 | 9.9098  | 1.1           | 0.9 to 1.3              |
| 2     | 1.1070 | 16.3081 | 3.8           | 3.6 to 4.0              |
| 3     | 2.8634 | 15.1325 | 9.5           | 9.3 to 9.8              |
| 4     | 3.2716 | 8.7725  | 16.3          | 16.0 to 16.6            |
| 5     | 3.7353 | 4.8806  | 26.0          | 25.5 to 26.6            |
| 6     | 5.1854 | 4.3100  | 32.8          | 31.9 to 33.6            |
| 7     | 2.2803 | 1.3288  | 37.9          | 32.7 to 43.1            |

The distributions of MADRS score for each value of CGI-S are shown in the following figures. The first figure shows the histogram of MADRS scores for each value of CGI-S and the shape of the fitted beta distributions. The second figure shows the relationship between derived MADRS and CGI-S on top of a scatter plot of raw MADRS versus raw CGI-S.

Online supplementary material

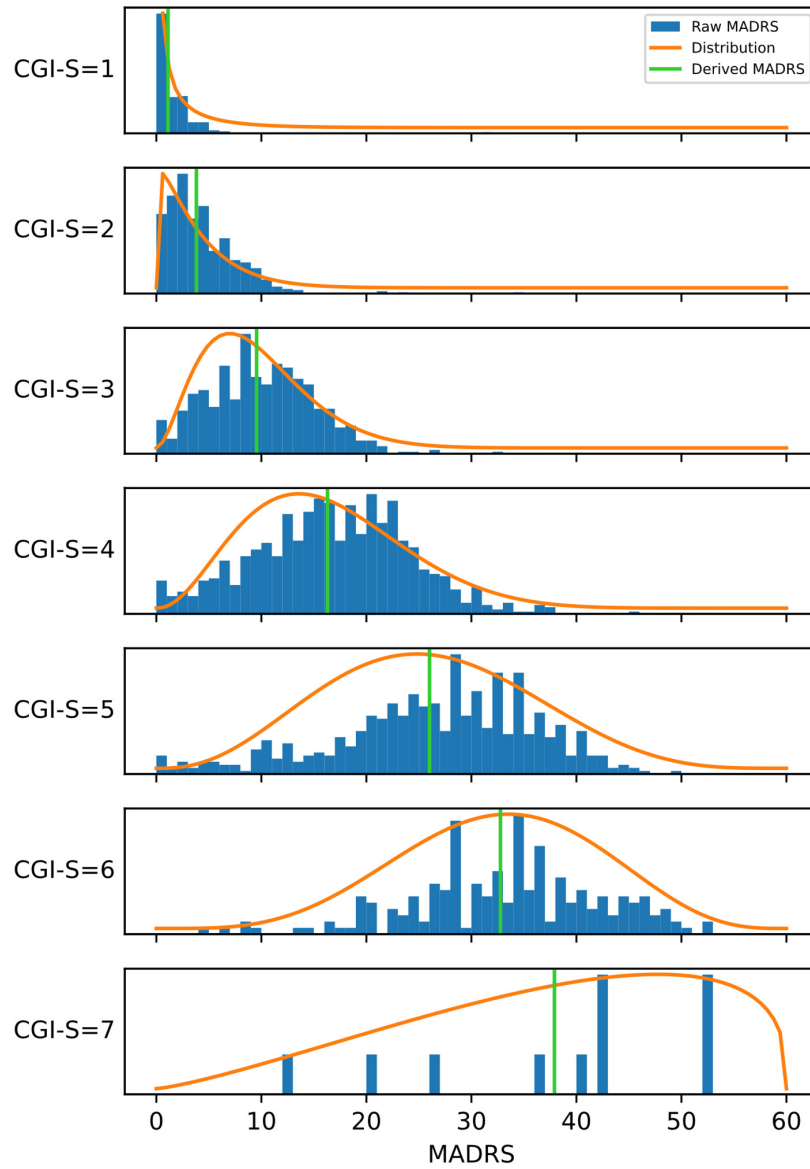

Online supplementary material

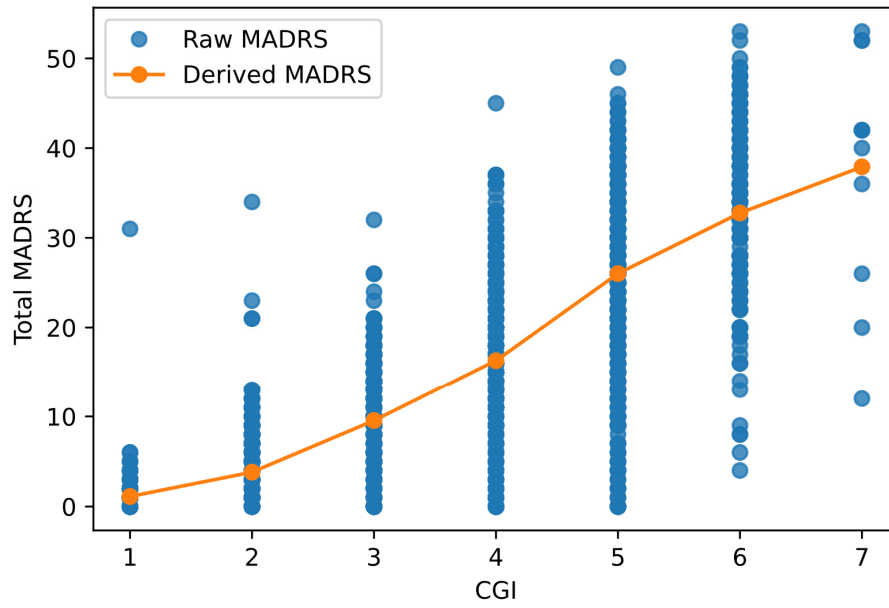

### Online supplementary material

#### (iv) Mental State Examination

The derived\_mse table contains the cleaned form of the mental state examination (MSE) records. In the NeuroBlu dataset, the MSE data are represented as Status Assessment Vectors (SAV) which are further described subsequently.

#### Columns

| Field            | Type | Description                                                                                                                                 |
|------------------|------|---------------------------------------------------------------------------------------------------------------------------------------------|
| person_id        | int8 | A foreign key identifier to the person for whom the MSE is recorded. The demographic details of that person are stored in the person table. |
| measurement_date | date | The date of the derived MSE.                                                                                                                |
| Days             | int4 | Number of days of measurement since the patient was first recorded in the dataset.                                                          |
| sav_i_cat_j      | int4 | i-th value of the SAV. Also correspond to the j-th value for cat category. Contains binary value. i takes value from 0 to 240.              |

#### Status Assessment Vectors

In the NeuroBlu dataset, the raw data for MSE is recorded in the form of semi-structured free text, making it difficult to analyze in their raw form.

To tackle this problem, we provide natural language processing (NLP) derived structured values of MSE. Raw MSE data for a single patient on a particular day are cleaned and passed through an NLP model that returns a 241-element vector form of MSE. This vector is called the Status Assessment Vector (SAV). SAV is a binary vector, where the value is 1 if the category-factor combination of the SAV is applicable for the patient. As an example, the 15th position in the SAV corresponds to whether a patient is responding to internal stimuli or not and value of 1 for this position means that the patient is responding to internal stimuli. Further details of the NLP pipeline are described in the following article:

Mukherjee, S.S., Yu, J., Won, Y., McClay, M.J., Wang, L., Rush, A.J. and Sarkar, J., 2020. Natural Language Processing-Based Quantification of the Mental State of Psychiatric Patients. *Computational Psychiatry*, 4, pp.76–106. DOI: [http://doi.org/10.1162/cpsy\\_a\\_00030](http://doi.org/10.1162/cpsy_a_00030)

The table below maps each element of the SAV to its location in the derived\_mse table.

## Online supplementary material

| SAV # | Category                       | Factor                                                 |
|-------|--------------------------------|--------------------------------------------------------|
| 0     | Abnormal or psychotic thoughts | no issues                                              |
| 1     | Abnormal or psychotic thoughts | experiencing delusions/abnormal thoughts (grandeur)    |
| 2     | Abnormal or psychotic thoughts | experiencing delusions/abnormal thoughts (persecution) |
| 3     | Abnormal or psychotic thoughts | experiencing delusions/abnormal thoughts (religious)   |
| 4     | Abnormal or psychotic thoughts | experiencing hallucinations (auditory)                 |
| 5     | Abnormal or psychotic thoughts | experiencing hallucinations (visual)                   |
| 6     | Abnormal or psychotic thoughts | experiencing hallucinations (tactile)                  |
| 7     | Abnormal or psychotic thoughts | History of delusions/abnormal thoughts                 |
| 8     | Abnormal or psychotic thoughts | History of hallucinations                              |
| 9     | Abnormal or psychotic thoughts | neutral/unable to categorize                           |
| 10    | Abnormal or psychotic thoughts | experiencing delusions (not specified)                 |
| 11    | Abnormal or psychotic thoughts | experiencing hallucinations (not specified)            |
| 12    | Abnormal or psychotic thoughts | experiencing delusions/abnormal thoughts (obsessions)  |
| 13    | Abnormal or psychotic thoughts | experiencing delusions/abnormal thoughts (paranoia)    |
| 14    | Abnormal or psychotic thoughts | experiencing hallucinations (olfactory)                |
| 15    | Abnormal or psychotic thoughts | responding to internal stimuli                         |
| 16    | Abnormal or psychotic thoughts | experiencing delusions/abnormal thoughts (sexual)      |
| 17    | Affect                         | no issues/appropriate affect                           |
| 18    | Affect                         | neutral/unable to categorize                           |
| 19    | Affect                         | aggressive                                             |
| 20    | Affect                         | reactive                                               |
| 21    | Affect                         | irritable/angry                                        |
| 22    | Affect                         | improved from last visit                               |
| 23    | Affect                         | issues with cognition                                  |
| 24    | Affect                         | loss of energy/tiredness                               |



## Online supplementary material

|    |                             |                                                    |
|----|-----------------------------|----------------------------------------------------|
| 25 | Affect                      | blunted/restricted                                 |
| 26 | Affect                      | anxious/fearful                                    |
| 27 | Affect                      | tearful/depressed/sad                              |
| 28 | Affect                      | bright/positive                                    |
| 29 | Affect                      | labile                                             |
| 30 | Affect                      | intense                                            |
| 31 | Affect                      | expansive/overly animated                          |
| 32 | Affect                      | generally odd or out of the ordinary/inappropriate |
| 33 | Affect                      | flooded                                            |
| 34 | Appearance                  | Issues with Affect                                 |
| 35 | Appearance                  | Sleep/Bed                                          |
| 36 | Appearance                  | Issues with Eye Contact                            |
| 37 | Appearance                  | Not age appropriate                                |
| 38 | Appearance                  | Issues with general Health                         |
| 39 | Appearance                  | Issues with Behavior                               |
| 40 | Appearance                  | Positive Affect                                    |
| 41 | Appearance                  | Positive Grooming/Hygiene                          |
| 42 | Appearance                  | Issues with Grooming/Hygiene                       |
| 43 | Appearance                  | Positive Health                                    |
| 44 | Appearance                  | Issues with Weight                                 |
| 45 | Appearance                  | Normal/no issues                                   |
| 46 | Appearance                  | Hospital attire                                    |
| 47 | Appearance                  | Positive dress                                     |
| 48 | Appearance                  | Issues with dress                                  |
| 49 | Appearance                  | Neutral                                            |
| 50 | Appearance                  | Positive eye contact                               |
| 51 | Appearance                  | Appropriate Age                                    |
| 52 | Appearance                  | Positive Behavior                                  |
| 53 | Association                 | intact/no issues                                   |
| 54 | Association                 | neutral/unable to categorize                       |
| 55 | Association                 | circumstantial                                     |
| 56 | Association                 | loose                                              |
| 57 | Association                 | tangential                                         |
| 58 | Association                 | age appropriate                                    |
| 59 | Association                 | improved                                           |
| 60 | Association                 | declined                                           |
| 61 | Association                 | disorganized                                       |
| 62 | Association                 | general issues                                     |
| 63 | Attention/<br>Concentration | intact/no issues                                   |
| 64 | Attention/<br>Concentration | neutral/unable to categorize                       |

## Online supplementary material

|    |                             |                               |
|----|-----------------------------|-------------------------------|
| 65 | Attention/<br>Concentration | general issues                |
| 66 | Attention/<br>Concentration | improved                      |
| 67 | Attention/<br>Concentration | declined                      |
| 68 | Attention/<br>Concentration | age appropriate               |
| 69 | Attention/<br>Concentration | issues due to MH              |
| 70 | Attention/<br>Concentration | issues due to DD              |
| 71 | Attention/<br>Concentration | varying                       |
| 72 | Attitude                    | positive/appropriate          |
| 73 | Attitude                    | neutral/unable to categorize  |
| 74 | Attitude                    | age appropriate               |
| 75 | Attitude                    | not age appropriate           |
| 76 | Attitude                    | negative/inappropriate        |
| 77 | Attitude                    | improved                      |
| 78 | Attitude                    | declined                      |
| 79 | Cognition                   | normal/no issues              |
| 80 | Cognition                   | neutral/unable to categorize  |
| 81 | Cognition                   | issues with concentration     |
| 82 | Cognition                   | positive concentration        |
| 83 | Cognition                   | issues with fund of knowledge |
| 84 | Cognition                   | positive fund of knowledge    |
| 85 | Cognition                   | issues with attention         |
| 86 | Cognition                   | positive attention            |
| 87 | Cognition                   | general issues                |
| 88 | Executive<br>Functioning    | intact/no issues              |
| 89 | Executive<br>Functioning    | neutral/unable to categorize  |
| 90 | Executive<br>Functioning    | some impairment               |
| 91 | Executive<br>Functioning    | much impairment               |
| 92 | Executive<br>Functioning    | improved since last session   |
| 93 | Executive<br>Functioning    | declined since last session   |
| 94 | Executive<br>Functioning    | age appropriate               |
| 95 | Executive<br>Functioning    | below age level               |
| 96 | Executive<br>Functioning    | impaired (due to DD)          |

## Online supplementary material

|     |                       |                                    |
|-----|-----------------------|------------------------------------|
| 97  | Executive Functioning | impaired (due to TBI)              |
| 98  | Executive Functioning | impaired (due to other MH issue)   |
| 99  | Fund of knowledge     | intact/no issues                   |
| 100 | Fund of knowledge     | neutral/unable to categorize       |
| 101 | Fund of knowledge     | positive vocabulary                |
| 102 | Fund of knowledge     | issues with vocabulary             |
| 103 | Fund of knowledge     | positive history                   |
| 104 | Fund of knowledge     | issues with history                |
| 105 | Fund of knowledge     | average                            |
| 106 | Fund of knowledge     | above average                      |
| 107 | Fund of knowledge     | below average                      |
| 108 | Fund of knowledge     | positive current events            |
| 109 | Fund of knowledge     | issues with current events         |
| 110 | Fund of knowledge     | generally limited/issues           |
| 111 | Fund of knowledge     | declined                           |
| 112 | Fund of knowledge     | improved                           |
| 113 | Gait and station      | normal/no issues                   |
| 114 | Gait and station      | neutral/unable to categorize       |
| 115 | Gait and station      | non-ambulatory                     |
| 116 | Gait and station      | issues with gait/station           |
| 117 | Gait and station      | assistive device needed            |
| 118 | Homicidal             | not present                        |
| 119 | Homicidal             | neutral                            |
| 120 | Homicidal             | present                            |
| 121 | Impulse control       | good/no issues                     |
| 122 | Impulse control       | neutral/unable to categorize       |
| 123 | Impulse control       | limited/some issues                |
| 124 | Impulse control       | poor/serious issues                |
| 125 | Impulse control       | age appropriate                    |
| 126 | Impulse control       | not age appropriate                |
| 127 | Insight               | no issues with insight             |
| 128 | Insight               | issues with insight                |
| 129 | Insight               | neutral/unable to categorize       |
| 130 | Intelligence          | normal/no issues with intelligence |
| 131 | Intelligence          | issues with intelligence           |
| 132 | Intelligence          | neutral/unable to categorize       |
| 133 | Judgment              | no issues with judgement           |
| 134 | Judgment              | issues with judgement              |
| 135 | Judgment              | neutral/unable to categorize       |
| 136 | Language              | intact                             |
| 137 | Language              | neutral/unable to categorize       |

## Online supplementary material

|     |                        |                                      |
|-----|------------------------|--------------------------------------|
| 138 | Language               | repetition intact                    |
| 139 | Language               | issues with repetition               |
| 140 | Language               | object naming intact                 |
| 141 | Language               | issues with object naming            |
| 142 | Language               | impaired                             |
| 143 | Language               | non-verbal/mute                      |
| 144 | Language               | minimally verbal                     |
| 145 | Language               | issues related to DD                 |
| 146 | Level of consciousness | normal; no issues notes              |
| 147 | Level of consciousness | neutral; unable to categorize        |
| 148 | Level of consciousness | sleepy/drowsy                        |
| 149 | Level of consciousness | clouded                              |
| 150 | Level of consciousness | issues verbally                      |
| 151 | Level of consciousness | misc. issues                         |
| 152 | Level of consciousness | impaired due to DD/MI                |
| 153 | Memory                 | no issues/memory unimpaired          |
| 154 | Memory                 | issues/memory impaired               |
| 155 | Memory                 | neutral/unable to categorize         |
| 156 | Mood                   | Normal; no issues                    |
| 157 | Mood                   | neutral; unable to categorize        |
| 158 | Mood                   | "anxious, tense"                     |
| 159 | Mood                   | "depressed, sad, despondent"         |
| 160 | Mood                   | "irritable, angry"                   |
| 161 | Mood                   | improved                             |
| 162 | Mood                   | declined                             |
| 163 | Mood                   | "elevated, manic"                    |
| 164 | Mood                   | labile                               |
| 165 | Mood                   | misc. issues                         |
| 166 | Mood                   | suicidal                             |
| 167 | Orientation            | no orientation issues                |
| 168 | Orientation            | issues with orientation to person    |
| 169 | Orientation            | issues with orientation to place     |
| 170 | Orientation            | issues with orientation to time/date |
| 171 | Orientation            | issues with orientation to situation |
| 172 | Orientation            | neutral/unable to categorize         |
| 173 | Orientation            | general orientation issues           |

## Online supplementary material

|     |             |                                           |
|-----|-------------|-------------------------------------------|
| 174 | Psychomotor | normal; no issues                         |
| 175 | Psychomotor | neutral; unable to categorize             |
| 176 | Psychomotor | retarded; slowed                          |
| 177 | Psychomotor | agitated; tense; restless                 |
| 178 | Psychomotor | improved                                  |
| 179 | Psychomotor | declined                                  |
| 180 | Psychomotor | constricted                               |
| 181 | Psychomotor | tremors                                   |
| 182 | Psychomotor | tics                                      |
| 183 | Psychomotor | involuntary movements                     |
| 184 | Psychomotor | misc. issues                              |
| 185 | Psychomotor | catatonic                                 |
| 186 | Reasoning   | normal; no issues                         |
| 187 | Reasoning   | neutral; unable to categorize             |
| 188 | Reasoning   | impaired; poor                            |
| 189 | Reasoning   | impaired due to DD/cognitive issues       |
| 190 | Reasoning   | impaired due to MI                        |
| 191 | Reasoning   | concrete                                  |
| 192 | Reasoning   | abstract                                  |
| 193 | Reasoning   | improved                                  |
| 194 | Reasoning   | misc. issues                              |
| 195 | Sensorium   | normal; no issues                         |
| 196 | Sensorium   | neutral; unable to categorize             |
| 197 | Sensorium   | clouded; sedate                           |
| 198 | Sensorium   | impaired                                  |
| 199 | Sensorium   | fluctuating                               |
| 200 | Sensorium   | impaired due to medications/drugs/alcohol |
| 201 | Sensorium   | sleepy; lethargic                         |
| 202 | Sleep       | "normal, no issues"                       |
| 203 | Sleep       | "neutral, unable to categorize"           |
| 204 | Sleep       | maintenance issues (can't stay asleep)    |
| 205 | Sleep       | onset issues (unable to fall asleep)      |
| 206 | Sleep       | nightmares                                |
| 207 | Sleep       | insomnia                                  |
| 208 | Sleep       | hypersomnia                               |
| 209 | Sleep       | misc. issues related to sleep             |
| 210 | Speech      | "normal, no issues"                       |
| 211 | Speech      | "neutral, unable to categorize"           |
| 212 | Speech      | issues with rate                          |
| 213 | Speech      | issues with tone                          |

## Online supplementary material

|     |                  |                                  |
|-----|------------------|----------------------------------|
| 214 | Speech           | issues with volume               |
| 215 | Speech           | stutter or lisp                  |
| 216 | Speech           | misc. issues                     |
| 217 | Speech           | impoverished                     |
| 218 | Speech           | improved                         |
| 219 | Speech           | unintelligible                   |
| 220 | Speech           | "mute, non-verbal"               |
| 221 | Suicidal         | "normal, no issues, not present" |
| 222 | Suicidal         | "neutral, unable to categorize"  |
| 223 | Suicidal         | suicidal ideation                |
| 224 | Suicidal         | suicidal with intent             |
| 225 | Suicidal         | suicidal with plan               |
| 226 | Suicidal         | suicide attempt                  |
| 227 | Suicidal         | history of ideation              |
| 228 | Suicidal         | history of attempt               |
| 229 | Suicidal         | self-injurious                   |
| 230 | Suicidal         | history of self-injury           |
| 231 | Suicidal         | suicidal ideation with means     |
| 232 | Violent Thoughts | "normal, no issues"              |
| 233 | Violent Thoughts | "neutral, unable to categorize"  |
| 234 | Violent Thoughts | present                          |
| 235 | Violent Thoughts | "present, with intent"           |
| 236 | Violent Thoughts | present with plan                |
| 237 | Violent Thoughts | present with means               |
| 238 | Violent Thoughts | history of violent thoughts      |
| 239 | Violent Thoughts | history of violent behaviors     |
| 240 | Violent Thoughts | violent/aggressive behavior      |

eTable 1: Description of U.S. clinics contributing EHR data to NeuroBlu

| Clinic ID | State          | Type of setting<br>Inpatient / outpatient / residential?                               | Services provided (data obtained from SAMHSA directory)                                                                                                                                                                                                                                                               | Domain focus                                                                                                                                                                                                                                                                     | Any specific disease focus?                                                                                                                                                |
|-----------|----------------|----------------------------------------------------------------------------------------|-----------------------------------------------------------------------------------------------------------------------------------------------------------------------------------------------------------------------------------------------------------------------------------------------------------------------|----------------------------------------------------------------------------------------------------------------------------------------------------------------------------------------------------------------------------------------------------------------------------------|----------------------------------------------------------------------------------------------------------------------------------------------------------------------------|
|           |                |                                                                                        | The SAMHSA directory has the list of all possible services an organization can provide.                                                                                                                                                                                                                               | Substance Use, Mental Health / Special Programs/Groups Offered                                                                                                                                                                                                                   | such as MDD, ADHD etc.                                                                                                                                                     |
| 01        | Colorado       | Outpatient                                                                             | Outpatient And Intensive Outpatient 24-Hour Care Residential DUI/DUID Classes Case Management Locations & Hours Medication Assisted Treatment We Accept Health Insurance                                                                                                                                              |                                                                                                                                                                                                                                                                                  |                                                                                                                                                                            |
| 02        | Colorado       | Hospital Outpatient, Telemedicine / telehealth                                         | Behavior modification, Cognitive behavioral therapy, Couples/family therapy, Dialectical behavior therapy, Group therapy, Integrated dual disorders treatment, Individual psychotherapy, Psychotropic medication, Trauma therapy                                                                                      | Seniors or older adults, Persons who have experienced trauma, Persons with post-traumatic stress disorder (PTSD), Children/adolescents with serious emotional disturbance (SED)                                                                                                  | Persons with post-traumatic stress disorder (PTSD)                                                                                                                         |
| 03        | Colorado       | Outpatient                                                                             | Monitor the health status of the population and the environment, and identify community health problems. Prevent and control the spread of communicable disease. Promote positive health behaviors and environmental practices. Mobilize community partnerships to solve identified health problems. Enforce laws and | Reduce Suicide, Improve Early Childhood Social & Emotional Development & Reduce Post-Partum Depression, Decrease Stigma & Increase Capacity                                                                                                                                      |                                                                                                                                                                            |
| 04        | Indiana        | Residential                                                                            | Activity therapy, Cognitive behavioral therapy, Couples/family therapy, Group therapy, Integrated dual disorders treatment, Individual psychotherapy, Psychotropic medication                                                                                                                                         |                                                                                                                                                                                                                                                                                  |                                                                                                                                                                            |
| 05        | North Carolina | Inpatient                                                                              | Activity therapy, Cognitive behavioral therapy, Couples/family therapy, Dialectical behavior therapy, Electroconvulsive therapy, Group therapy, Individual psychotherapy, Psychotropic medication                                                                                                                     |                                                                                                                                                                                                                                                                                  |                                                                                                                                                                            |
| 06        | Missouri       | Inpatient, Partial hospitalization/day treatment, Residential, Telemedicine/telehealth | Activity therapy, Cognitive behavioral therapy, Dialectical behavior therapy, Electroconvulsive therapy, Group therapy, Integrated dual disorders treatment, Individual psychotherapy, Psychotropic medication                                                                                                        |                                                                                                                                                                                                                                                                                  |                                                                                                                                                                            |
| 07        | New York       | Hospital Outpatient                                                                    | Cognitive behavioral therapy, Couples/family therapy, Dialectical behavior therapy, Group therapy, Integrated dual disorders treatment, Individual psychotherapy, Psychotropic medication, Trauma therapy                                                                                                             |                                                                                                                                                                                                                                                                                  |                                                                                                                                                                            |
| 08        | New York       | Hospital Inpatient                                                                     | Activity therapy, Behavior modification, Cognitive behavioral therapy, Dialectical behavior therapy, Group therapy, Integrated dual disorders treatment, Individual psychotherapy, Psychotropic medication, Trauma therapy                                                                                            |                                                                                                                                                                                                                                                                                  |                                                                                                                                                                            |
| 09        | Connecticut    | Hospital Outpatient                                                                    | Behavior modification, Cognitive behavioral therapy, Couples/family therapy, Group therapy, Integrated dual disorders treatment, Individual psychotherapy, Psychotropic medication, Trauma therapy                                                                                                                    | Persons with co-occurring mental and substance use disorders, Persons who have experienced trauma, Persons with post-traumatic stress disorder (PTSD)                                                                                                                            | Persons with post-traumatic stress disorder (PTSD)                                                                                                                         |
| 10        | North Carolina | Hospital Inpatient                                                                     | Activity therapy, Cognitive behavioral therapy, Couples/family therapy, Dialectical behavior therapy, Electroconvulsive therapy, Group therapy, Individual psychotherapy, Psychotropic medication                                                                                                                     | Transitional age young adults, Persons with co-occurring mental and substance use disorders, Persons with eating disorders                                                                                                                                                       |                                                                                                                                                                            |
| 11        | Indiana        | Hospital Outpatient & Residential                                                      | Activity therapy, Behavior modification, Cognitive behavioral therapy, Dialectical behavior therapy, Group therapy, Integrated dual disorders treatment, Individual psychotherapy, Psychotropic medication, Trauma therapy                                                                                            |                                                                                                                                                                                                                                                                                  |                                                                                                                                                                            |
| 12        | Virginia       | Hospital Outpatient, Partial hospitalization/day treatment, Telemedicine/telehealth    | Activity therapy, Behavior modification, Cognitive behavioral therapy, Couples/family therapy, Dialectical behavior therapy, Group therapy, Integrated dual disorders treatment, Individual psychotherapy, Psychotropic medication, Trauma therapy                                                                    | Transitional age young adults, Persons who have experienced trauma, Persons with post-traumatic stress disorder (PTSD), Children/adolescents with serious emotional disturbance (SED)                                                                                            | Persons with post-traumatic stress disorder (PTSD)                                                                                                                         |
| 13        | Indiana        | Hospital Outpatient                                                                    | Activity therapy, Behavior modification, Cognitive behavioral therapy, Couples/family therapy, Dialectical behavior therapy, Group therapy, Integrated dual disorders treatment, Individual psychotherapy, Psychotropic medication, Trauma therapy                                                                    | Persons with co-occurring mental and substance use disorders, Persons with serious mental illness (SMI)                                                                                                                                                                          |                                                                                                                                                                            |
| 14        | Florida        | Outpatient                                                                             | Behavior modification, Cognitive behavioral therapy, Group therapy, Integrated dual disorders treatment, Individual psychotherapy, Psychotropic medication, Trauma therapy                                                                                                                                            | Persons with co-occurring mental and substance use disorders, Persons with serious mental illness (SMI)                                                                                                                                                                          |                                                                                                                                                                            |
| 15        | New York       | Hospital Outpatient                                                                    | Activity therapy, Behavior modification, Cognitive behavioral therapy, Couples/family therapy, Dialectical behavior therapy, Group therapy, Integrated dual disorders treatment, Individual psychotherapy, Psychotropic medication, Trauma therapy                                                                    | Persons with co-occurring mental and substance use disorders, Persons who have experienced trauma, Persons with post-traumatic stress disorder (PTSD), Persons with serious mental illness (SMI)                                                                                 | Persons with post-traumatic stress disorder (PTSD)                                                                                                                         |
| 16        | New York       | Outpatient                                                                             | Activity therapy, Behavior modification, Cognitive behavioral therapy, Couples/family therapy, Dialectical behavior therapy, Group therapy, Integrated dual disorders treatment, Individual psychotherapy, Psychotropic medication, Trauma therapy                                                                    | Persons with co-occurring mental and substance use disorders, Persons who have experienced trauma, Persons with post-traumatic stress disorder (PTSD), Persons with serious mental illness (SMI)                                                                                 | Persons with post-traumatic stress disorder (PTSD)                                                                                                                         |
| 17        | Virginia       | Hospital Outpatient, Telemedicine / telehealth                                         | Behavior modification, Cognitive behavioral therapy, Couples/family therapy, Group therapy, Integrated dual disorders treatment, Individual psychotherapy, Psychotropic medication, Trauma therapy                                                                                                                    | Persons with co-occurring mental and substance use disorders, Persons who have experienced trauma, Persons with post-traumatic stress disorder (PTSD), Children/adolescents with serious emotional disturbance (SED), Persons with serious mental illness (SMI)                  | Persons with post-traumatic stress disorder (PTSD)                                                                                                                         |
| 18        | Indiana        | Hospital Outpatient, Telemedicine / telehealth                                         | Activity therapy, Behavior modification, Cognitive behavioral therapy, Dialectical behavior therapy, Group therapy, Integrated dual disorders treatment, Individual psychotherapy, Psychotropic medication, Trauma therapy                                                                                            | Children/adolescents with serious emotional disturbance (SED), Persons with serious mental illness (SMI)                                                                                                                                                                         |                                                                                                                                                                            |
| 19        | Missouri       | Outpatient                                                                             | Full spectrum of comprehensive mental health services for individuals of all ages including billing services, injection clinic, ketamine infusion, medication management, neurology, psychotherapy/counseling, psych testing, pharmacy services, research, andTMS therapy                                             |                                                                                                                                                                                                                                                                                  | difficult to treat cases of depression, anxiety, and bipolar disorders, among others, diagnoses of Major Depressive Disorder (MDD) and Obsessive Compulsive Disorder (OCD) |
| 20        | Montana        | Outpatient, Telehealth                                                                 | Inpatient Rehab, Day Treatment, Outpatient Services, Family Therapy, Chemical Dependency Assessments, DUI School, Medical Detoxification, Long Term Residential for Mothers with Children, Re-Entry Programs, Spanish Speaking counselor                                                                              | In addition to mental health and substance use counseling, Mental Health Services also includes, Substance Abuse Professional (SAP) services, Mental Health assessment services, Clinical supervision for licensure, EMDR, Family therapy, Grief therapy, Therapeutic            | Substance Use Disorders, Sexual Addictions, Co-Dependency, Co-Occurring Disorders, Persons with post-traumatic stress disorder (PTSD)                                      |
| 21        | Alabama        | Outpatient & Residential Treatment                                                     | Outpatient, Residential Treatment & community based                                                                                                                                                                                                                                                                   |                                                                                                                                                                                                                                                                                  | substance use disorder treatment and behavioral rehabilitation for adolescents                                                                                             |
| 22        | Delaware       | Outpatient                                                                             | Drug & Alcohol Addiction Treatment, Drug & Alcohol Detoxification Program, Offers Buprenorphine detox, Relapses prevention with the use of naltrexone, Offers Buprenorphine used in treatment, Oral form of Naltrexone, Provides Injectable Naltrexone (Vivitrol), Clients accepted on opioid/methadone medication,   |                                                                                                                                                                                                                                                                                  |                                                                                                                                                                            |
| 23        | Colorado       | Hospital Inpatient, Hospital Outpatient, Telemedicine / telehealth                     | Counseling, Suicide prevention, Outreach                                                                                                                                                                                                                                                                              | Learning Disabilities, Attention Deficit Hyperactivity Disorder (ADHD) and Attention Deficit Disorder (ADD), Behavior Disorders, Academic Achievement, Psychiatric Disorders, Intellectual Disabilities, Gifted and Talented, Autism                                             |                                                                                                                                                                            |
| 24        | New Hampshire  | Hospital Outpatient, Telemedicine / telehealth                                         | Cognitive behavioral therapy, Couples/family therapy, Dialectical behavior therapy, Integrated dual disorders treatment, Individual psychotherapy, Psychotropic medication, Trauma therapy                                                                                                                            | Seniors or older adults, Active duty military, Military families, Persons with co-occurring mental and substance use disorders, Persons who have experienced trauma, Persons with post-traumatic stress disorder (PTSD), Children/adolescents with serious emotional disturbance | Persons with post-traumatic stress disorder (PTSD)                                                                                                                         |
| 25        | New York       | Hospital Inpatient, Hospital Outpatient, Telemedicine / telehealth                     | Activity therapy, Cognitive behavioral therapy, Couples/family therapy, Dialectical behavior therapy, Group therapy, Individual psychotherapy, Psychotropic medication, Trauma therapy                                                                                                                                | Transitional age young adults, Seniors or older adults, Lesbian, gay, bisexual, or transgender (LGBT) clients, Persons who have experienced trauma, Persons with Alzheimer's or dementia, Children/adolescents with serious emotional disturbance (SED),                         |                                                                                                                                                                            |

## Online supplementary material

eTable 2: NeuroBlu dataset race distribution

| Race                                      | Number of patients | Percentage |
|-------------------------------------------|--------------------|------------|
| White                                     | 276,633            | 49.1%      |
| Unknown                                   | 186,517            | 33.1%      |
| Black or African American                 | 73,504             | 13.1%      |
| Other Race                                | 13,179             | 2.3%       |
| Native Hawaiian or Other Pacific Islander | 6,712              | 1.2%       |
| Asian                                     | 3,958              | 0.7%       |
| American Indian or Alaska Native          | 2,437              | 0.4%       |

eTable 3: NeuroBlu dataset age distribution

| Age (years) | Number of patients | Percentage |
|-------------|--------------------|------------|
| 0-9         | 45,050             | 8.0%       |
| 10-19       | 116,741            | 20.7%      |
| 20-29       | 108,863            | 19.3%      |
| 30-39       | 94,114             | 16.7%      |
| 40-49       | 81,556             | 14.5%      |
| 50-59       | 65,498             | 11.6%      |
| 60-69       | 30,945             | 5.5%       |
| 70-79       | 15,339             | 2.7%       |
| 80+         | 4,828              | 0.9%       |

eTable 4: NeuroBlu dataset diagnosis distribution

| Diagnosis                                       | Number of patients | Percentage |
|-------------------------------------------------|--------------------|------------|
| Dementia & Alzheimer's disease                  | 5,029              | 0.9%       |
| Substance-use disorders                         | 152,790            | 28.1%      |
| Schizophrenia                                   | 14,592             | 2.7%       |
| Schizoaffective disorder                        | 15,044             | 2.8%       |
| Bipolar disorder                                | 69,607             | 12.8%      |
| Major depressive disorder (MDD)                 | 129,120            | 23.7%      |
| Anxiety disorders                               | 103,923            | 19.1%      |
| Attention-deficit hyperactivity disorder (ADHD) | 53,744             | 9.9%       |



## Online supplementary material

eTable 5: Gender distribution by diagnosis

| Diagnosis                                              | Number of male patients | Number of female patients | Number with unknown gender | Percentage Male | Percentage Female | Percentage Unknown | Total number |
|--------------------------------------------------------|-------------------------|---------------------------|----------------------------|-----------------|-------------------|--------------------|--------------|
| <b>Dementia &amp; Alzheimer's disease</b>              | 2,035                   | 2,962                     | 32                         | 40.5%           | 58.9%             | 0.8%               | 5,029        |
| <b>Substance-use disorders</b>                         | 96,180                  | 56,328                    | 282                        | 62.9%           | 36.9%             | 0.0%               | 152,790      |
| <b>Schizophrenia</b>                                   | 9,163                   | 5,401                     | 28                         | 62.8%           | 37.0%             | 0.4%               | 14,592       |
| <b>Schizoaffective disorder</b>                        | 7,807                   | 7,222                     | 15                         | 51.9%           | 48.0%             | 0.3%               | 15,044       |
| <b>Bipolar disorder</b>                                | 27,877                  | 41,642                    | 88                         | 40.0%           | 59.8%             | 0.1%               | 69,607       |
| <b>Major depressive disorder (MDD)</b>                 | 46,603                  | 82,395                    | 122                        | 36.1%           | 63.8%             | 0.0%               | 129,120      |
| <b>Anxiety disorders</b>                               | 38,255                  | 65,569                    | 99                         | 36.8%           | 63.1%             | 0.0%               | 103,923      |
| <b>Attention-deficit hyperactivity disorder (ADHD)</b> | 32,781                  | 20,933                    | 30                         | 61.0%           | 38.9%             | 0.1%               | 53,744       |

## Online supplementary material

eTable 6: ICD-9/ICD-10 code definitions for diagnostic category

| Diagnosis         | ICD code | ICD type | ICD Description                                                          |
|-------------------|----------|----------|--------------------------------------------------------------------------|
| ADHD              | 314      | ICD-9    | Attention deficit disorder without mention of hyperactivity              |
| ADHD              | 314.01   | ICD-9    | Attention deficit disorder with hyperactivity                            |
| ADHD              | F90.0    | ICD-10   | Attention-deficit hyperactivity disorder, predominantly inattentive type |
| ADHD              | F90.1    | ICD-10   | Attention-deficit hyperactivity disorder, predominantly hyperactive type |
| ADHD              | F90.2    | ICD-10   | Attention-deficit hyperactivity disorder, combined type                  |
| ADHD              | F90.8    | ICD-10   | Attention-deficit hyperactivity disorder, other type                     |
| ADHD              | F90.9    | ICD-10   | Attention-deficit hyperactivity disorder, unspecified type               |
| Anxiety disorders | 300.01   | ICD-9    | Panic disorder without agoraphobia                                       |
| Anxiety disorders | 300.02   | ICD-9    | Generalized anxiety disorder                                             |
| Anxiety disorders | 300.2    | ICD-9    | Phobia, unspecified                                                      |
| Anxiety disorders | 300.21   | ICD-9    | Agoraphobia with panic disorder                                          |
| Anxiety disorders | 300.22   | ICD-9    | Agoraphobia without mention of panic attacks                             |
| Anxiety disorders | 300.23   | ICD-9    | Social phobia                                                            |
| Anxiety disorders | 300.29   | ICD-9    | Other isolated or specific phobias                                       |
| Anxiety disorders | 300.3    | ICD-9    | Obsessive-compulsive disorders                                           |
| Anxiety disorders | 309.81   | ICD-9    | Posttraumatic stress disorder                                            |
| Anxiety disorders | F40.00   | ICD-10   | Agoraphobia, unspecified                                                 |
| Anxiety disorders | F40.01   | ICD-10   | Agoraphobia with panic disorder                                          |
| Anxiety disorders | F40.02   | ICD-10   | Agoraphobia without panic disorder                                       |
| Anxiety disorders | F40.10   | ICD-10   | Social phobia, unspecified                                               |
| Anxiety disorders | F40.11   | ICD-10   | Social phobia, generalized                                               |
| Anxiety disorders | F40.210  | ICD-10   | Arachnophobia                                                            |
| Anxiety disorders | F40.218  | ICD-10   | Other animal type phobia                                                 |
| Anxiety disorders | F40.220  | ICD-10   | Fear of thunderstorms                                                    |
| Anxiety disorders | F40.228  | ICD-10   | Other natural environment type phobia                                    |

## Online supplementary material

|                   |         |        |                                                       |
|-------------------|---------|--------|-------------------------------------------------------|
| Anxiety disorders | F40.230 | ICD-10 | Fear of blood                                         |
| Anxiety disorders | F40.231 | ICD-10 | Fear of injections and transfusions                   |
| Anxiety disorders | F40.232 | ICD-10 | Fear of other medical care                            |
| Anxiety disorders | F40.233 | ICD-10 | Fear of injury                                        |
| Anxiety disorders | F40.240 | ICD-10 | Claustrophobia                                        |
| Anxiety disorders | F40.241 | ICD-10 | Acrophobia                                            |
| Anxiety disorders | F40.242 | ICD-10 | Fear of bridges                                       |
| Anxiety disorders | F40.243 | ICD-10 | Fear of flying                                        |
| Anxiety disorders | F40.248 | ICD-10 | Other situational type phobia                         |
| Anxiety disorders | F40.290 | ICD-10 | Androphobia                                           |
| Anxiety disorders | F40.291 | ICD-10 | Gynephobia                                            |
| Anxiety disorders | F40.298 | ICD-10 | Other specified phobia                                |
| Anxiety disorders | F40.8   | ICD-10 | Other phobic anxiety disorders                        |
| Anxiety disorders | F40.9   | ICD-10 | Phobic anxiety disorder, unspecified                  |
| Anxiety disorders | F41.0   | ICD-10 | Panic disorder [episodic paroxysmal anxiety]          |
| Anxiety disorders | F41.1   | ICD-10 | Generalized anxiety disorder                          |
| Anxiety disorders | F42.2   | ICD-10 | Mixed obsessional thoughts and acts                   |
| Anxiety disorders | F42.3   | ICD-10 | Hoarding disorder                                     |
| Anxiety disorders | F42.4   | ICD-10 | Excoriation (skin-picking) disorder                   |
| Anxiety disorders | F42.8   | ICD-10 | Other obsessive-compulsive disorder                   |
| Anxiety disorders | F42.9   | ICD-10 | Obsessive-compulsive disorder, unspecified            |
| Anxiety disorders | F43.10  | ICD-10 | Post-traumatic stress disorder, unspecified           |
| Anxiety disorders | F43.11  | ICD-10 | Post-traumatic stress disorder, acute                 |
| Anxiety disorders | F43.12  | ICD-10 | Post-traumatic stress disorder, chronic               |
| Bipolar Disorder  | 296     | ICD-9  | Bipolar I disorder, single manic episode, unspecified |

## Online supplementary material

|                  |        |        |                                                                                                               |
|------------------|--------|--------|---------------------------------------------------------------------------------------------------------------|
| Bipolar Disorder | 296.01 | ICD-10 | Bipolar I disorder, single manic episode, mild                                                                |
| Bipolar Disorder | 296.02 | ICD-11 | Bipolar I disorder, single manic episode, moderate                                                            |
| Bipolar Disorder | 296.03 | ICD-12 | Bipolar I disorder, single manic episode, severe, without mention of psychotic behavior                       |
| Bipolar Disorder | 296.04 | ICD-13 | Bipolar I disorder, single manic episode, specified as with psychotic behavior                                |
| Bipolar Disorder | 296.05 | ICD-14 | Bipolar I disorder, single manic episode, in partial or unspecified remission                                 |
| Bipolar Disorder | 296.06 | ICD-15 | Bipolar I disorder, single manic episode, in full remission                                                   |
| Bipolar Disorder | 296.4  | ICD-9  | Bipolar I disorder, most recent episode (or current) manic, unspecified                                       |
| Bipolar Disorder | 296.41 | ICD-9  | Bipolar I disorder, most recent episode (or current) manic, mild                                              |
| Bipolar Disorder | 296.42 | ICD-9  | Bipolar I disorder, most recent episode (or current) manic, moderate                                          |
| Bipolar Disorder | 296.43 | ICD-9  | Bipolar I disorder, most recent episode (or current) manic, severe, without mention of psychotic behavior     |
| Bipolar Disorder | 296.44 | ICD-9  | Bipolar I disorder, most recent episode (or current) manic, severe, specified as with psychotic behavior      |
| Bipolar Disorder | 296.45 | ICD-9  | Bipolar I disorder, most recent episode (or current) manic, in partial or unspecified remission               |
| Bipolar Disorder | 296.46 | ICD-9  | Bipolar I disorder, most recent episode (or current) manic, in full remission                                 |
| Bipolar Disorder | 296.5  | ICD-9  | Bipolar I disorder, most recent episode (or current) depressed, unspecified                                   |
| Bipolar Disorder | 296.51 | ICD-9  | Bipolar I disorder, most recent episode (or current) depressed, mild                                          |
| Bipolar Disorder | 296.52 | ICD-9  | Bipolar I disorder, most recent episode (or current) depressed, moderate                                      |
| Bipolar Disorder | 296.53 | ICD-9  | Bipolar I disorder, most recent episode (or current) depressed, severe, without mention of psychotic behavior |
| Bipolar Disorder | 296.54 | ICD-9  | Bipolar I disorder, most recent episode (or current) depressed, severe, specified as with psychotic behavior  |
| Bipolar Disorder | 296.55 | ICD-9  | Bipolar I disorder, most recent episode (or current) depressed, in partial or unspecified remission           |
| Bipolar Disorder | 296.56 | ICD-9  | Bipolar I disorder, most recent episode (or current) depressed, in full remission                             |
| Bipolar Disorder | 296.6  | ICD-9  | Bipolar I disorder, most recent episode (or current) mixed, unspecified                                       |
| Bipolar Disorder | 296.61 | ICD-9  | Bipolar I disorder, most recent episode (or current) mixed, mild                                              |
| Bipolar Disorder | 296.62 | ICD-9  | Bipolar I disorder, most recent episode (or current) mixed, moderate                                          |
| Bipolar Disorder | 296.63 | ICD-9  | Bipolar I disorder, most recent episode (or current) mixed, severe, without mention of psychotic behavior     |
| Bipolar Disorder | 296.64 | ICD-9  | Bipolar I disorder, most recent episode (or current) mixed, severe, specified as with psychotic behavior      |

## Online supplementary material

|                  |        |        |                                                                                                 |
|------------------|--------|--------|-------------------------------------------------------------------------------------------------|
| Bipolar Disorder | 296.65 | ICD-9  | Bipolar I disorder, most recent episode (or current) mixed, in partial or unspecified remission |
| Bipolar Disorder | 296.66 | ICD-9  | Bipolar I disorder, most recent episode (or current) mixed, in full remission                   |
| Bipolar Disorder | 296.7  | ICD-9  | Bipolar I disorder, most recent episode (or current) unspecified                                |
| Bipolar Disorder | 296.8  | ICD-9  | Bipolar disorder, unspecified                                                                   |
| Bipolar Disorder | 296.89 | ICD-9  | Other bipolar disorders                                                                         |
| Bipolar Disorder | F31.0  | ICD-10 | Bipolar disorder, current episode hypomanic                                                     |
| Bipolar Disorder | F31.10 | ICD-10 | Bipolar disorder, current episode manic without psychotic features, unspecified                 |
| Bipolar Disorder | F31.11 | ICD-10 | Bipolar disorder, current episode manic without psychotic features, mild                        |
| Bipolar Disorder | F31.12 | ICD-10 | Bipolar disorder, current episode manic without psychotic features, moderate                    |
| Bipolar Disorder | F31.13 | ICD-10 | Bipolar disorder, current episode manic without psychotic features, severe                      |
| Bipolar Disorder | F31.2  | ICD-10 | Bipolar disorder, current episode manic severe with psychotic features                          |
| Bipolar Disorder | F31.30 | ICD-10 | Bipolar disorder, current episode depressed, mild or moderate severity, unspecified             |
| Bipolar Disorder | F31.31 | ICD-10 | Bipolar disorder, current episode depressed, mild                                               |
| Bipolar Disorder | F31.32 | ICD-10 | Bipolar disorder, current episode depressed, moderate                                           |
| Bipolar Disorder | F31.4  | ICD-10 | Bipolar disorder, current episode depressed, severe, without psychotic features                 |
| Bipolar Disorder | F31.5  | ICD-10 | Bipolar disorder, current episode depressed, severe, with psychotic features                    |
| Bipolar Disorder | F31.60 | ICD-10 | Bipolar disorder, current episode mixed, unspecified                                            |
| Bipolar Disorder | F31.61 | ICD-10 | Bipolar disorder, current episode mixed, mild                                                   |
| Bipolar Disorder | F31.62 | ICD-10 | Bipolar disorder, current episode mixed, moderate                                               |
| Bipolar Disorder | F31.63 | ICD-10 | Bipolar disorder, current episode mixed, severe, without psychotic features                     |
| Bipolar Disorder | F31.64 | ICD-10 | Bipolar disorder, current episode mixed, severe, with psychotic features                        |
| Bipolar Disorder | F31.70 | ICD-10 | Bipolar disorder, currently in remission, most recent episode unspecified                       |
| Bipolar Disorder | F31.71 | ICD-10 | Bipolar disorder, in partial remission, most recent episode hypomanic                           |
| Bipolar Disorder | F31.72 | ICD-10 | Bipolar disorder, in full remission, most recent episode hypomanic                              |
| Bipolar Disorder | F31.73 | ICD-10 | Bipolar disorder, in partial remission, most recent episode manic                               |

## Online supplementary material

|                                  |        |        |                                                                          |
|----------------------------------|--------|--------|--------------------------------------------------------------------------|
| Bipolar Disorder                 | F31.74 | ICD-10 | Bipolar disorder, in full remission, most recent episode manic           |
| Bipolar Disorder                 | F31.75 | ICD-10 | Bipolar disorder, in partial remission, most recent episode depressed    |
| Bipolar Disorder                 | F31.76 | ICD-10 | Bipolar disorder, in full remission, most recent episode depressed       |
| Bipolar Disorder                 | F31.77 | ICD-10 | Bipolar disorder, in partial remission, most recent episode mixed        |
| Bipolar Disorder                 | F31.78 | ICD-10 | Bipolar disorder, in full remission, most recent episode mixed           |
| Bipolar Disorder                 | F31.81 | ICD-10 | Bipolar II disorder                                                      |
| Bipolar Disorder                 | F31.89 | ICD-10 | Other bipolar disorder                                                   |
| Bipolar Disorder                 | F31.9  | ICD-10 | Bipolar disorder, unspecified                                            |
| Dementia and Alzheimer's Disease | 290    | ICD-9  | Senile dementia, uncomplicated                                           |
| Dementia and Alzheimer's Disease | 290.1  | ICD-9  | Presenile dementia                                                       |
| Dementia and Alzheimer's Disease | 290.2  | ICD-9  | Senile dementia with delusional or depressive features                   |
| Dementia and Alzheimer's Disease | 290.3  | ICD-9  | Senile dementia with delirium                                            |
| Dementia and Alzheimer's Disease | 290.4  | ICD-9  | Vascular dementia                                                        |
| Dementia and Alzheimer's Disease | 290.43 | ICD-9  | Vascular dementia, with depressed mood                                   |
| Dementia and Alzheimer's Disease | 294.1  | ICD-9  | Dementia in conditions classified elsewhere                              |
| Dementia and Alzheimer's Disease | 294.8  | ICD-9  | Other persistent mental disorders due to conditions classified elsewhere |
| Dementia and Alzheimer's Disease | 331    | ICD-9  | Alzheimer's disease                                                      |
| Dementia and Alzheimer's Disease | F03.90 | ICD-10 | Unspecified dementia without behavioral disturbance                      |
| Dementia and Alzheimer's Disease | F03.91 | ICD-10 | Unspecified dementia with behavioral disturbance                         |

## Online supplementary material

|                                  |        |        |                                                                                                       |
|----------------------------------|--------|--------|-------------------------------------------------------------------------------------------------------|
| Dementia and Alzheimer's Disease | G30.1  | ICD-10 | Alzheimer's disease with late onset                                                                   |
| Dementia and Alzheimer's Disease | G30.8  | ICD-10 | Other Alzheimer's disease                                                                             |
| MDD                              | 296.2  | ICD-9  | Major depressive affective disorder, single episode, unspecified                                      |
| MDD                              | 296.21 | ICD-9  | Major depressive affective disorder, single episode, mild                                             |
| MDD                              | 296.22 | ICD-9  | Major depressive affective disorder, single episode, moderate                                         |
| MDD                              | 296.23 | ICD-9  | Major depressive affective disorder, single episode, severe, without mention of psychotic behavior    |
| MDD                              | 296.24 | ICD-9  | Major depressive affective disorder, single episode, severe, specified as with psychotic behavior     |
| MDD                              | 296.25 | ICD-9  | Major depressive affective disorder, single episode, in partial or unspecified remission              |
| MDD                              | 296.26 | ICD-9  | Major depressive affective disorder, single episode, in full remission                                |
| MDD                              | 296.3  | ICD-9  | Major depressive affective disorder, recurrent episode, unspecified                                   |
| MDD                              | 296.31 | ICD-9  | Major depressive affective disorder, recurrent episode, mild                                          |
| MDD                              | 296.32 | ICD-9  | Major depressive affective disorder, recurrent episode, moderate                                      |
| MDD                              | 296.33 | ICD-9  | Major depressive affective disorder, recurrent episode, severe, without mention of psychotic behavior |
| MDD                              | 296.34 | ICD-9  | Major depressive affective disorder, recurrent episode, severe, specified as with psychotic behavior  |
| MDD                              | 296.35 | ICD-9  | Major depressive affective disorder, recurrent episode, in partial or unspecified remission           |
| MDD                              | 296.36 | ICD-9  | Major depressive affective disorder, recurrent episode, in full remission                             |
| MDD                              | F32.0  | ICD-10 | Major depressive disorder, single episode, mild                                                       |
| MDD                              | F32.1  | ICD-10 | Major depressive disorder, single episode, moderate                                                   |
| MDD                              | F32.2  | ICD-10 | Major depressive disorder, single episode, severe without psychotic features                          |
| MDD                              | F32.3  | ICD-10 | Major depressive disorder, single episode, severe with psychotic features                             |
| MDD                              | F32.4  | ICD-10 | Major depressive disorder, single episode, in partial remission                                       |
| MDD                              | F32.5  | ICD-10 | Major depressive disorder, single episode, in full remission                                          |
| MDD                              | F32.81 | ICD-10 | Premenstrual dysphoric disorder                                                                       |
| MDD                              | F32.89 | ICD-10 | Other specified depressive episodes                                                                   |
| MDD                              | F32.9  | ICD-10 | Major depressive disorder, single episode, unspecified                                                |
| MDD                              | F33.0  | ICD-10 | Major depressive disorder, recurrent, mild                                                            |
| MDD                              | F33.1  | ICD-10 | Major depressive disorder, recurrent, moderate                                                        |

## Online supplementary material

|                          |        |        |                                                                        |
|--------------------------|--------|--------|------------------------------------------------------------------------|
| MDD                      | F33.2  | ICD-10 | Major depressive disorder, recurrent severe without psychotic features |
| MDD                      | F33.3  | ICD-10 | Major depressive disorder, recurrent, severe with psychotic symptoms   |
| MDD                      | F33.40 | ICD-10 | Major depressive disorder, recurrent, in remission, unspecified        |
| MDD                      | F33.41 | ICD-10 | Major depressive disorder, recurrent, in partial remission             |
| MDD                      | F33.42 | ICD-10 | Major depressive disorder, recurrent, in full remission                |
| MDD                      | F33.8  | ICD-10 | Other recurrent depressive disorders                                   |
| MDD                      | F33.9  | ICD-10 | Major depressive disorder, recurrent, unspecified                      |
| Schizoaffective disorder | 295.7  | ICD-9  | Schizoaffective disorder, unspecified                                  |
| Schizoaffective disorder | 295.71 | ICD-9  | Schizoaffective disorder, subchronic                                   |
| Schizoaffective disorder | 295.72 | ICD-9  | Schizoaffective disorder, chronic                                      |
| Schizoaffective disorder | 295.73 | ICD-9  | Schizoaffective disorder, subchronic with acute exacerbation           |
| Schizoaffective disorder | 295.74 | ICD-9  | Schizoaffective disorder, chronic with acute exacerbation              |
| Schizoaffective disorder | 295.75 | ICD-9  | Schizoaffective disorder, in remission                                 |
| Schizoaffective disorder | F25.0  | ICD-10 | Schizoaffective disorder, bipolar type                                 |
| Schizoaffective disorder | F25.1  | ICD-10 | Schizoaffective disorder, depressive type                              |
| Schizoaffective disorder | F25.8  | ICD-10 | Other schizoaffective disorders                                        |
| Schizoaffective disorder | F25.9  | ICD-10 | Schizoaffective disorder, unspecified                                  |
| Schizophrenia            | 295    | ICD-9  | Simple type schizophrenia, unspecified                                 |
| Schizophrenia            | 295.01 | ICD-9  | Simple type schizophrenia, subchronic                                  |
| Schizophrenia            | 295.02 | ICD-9  | Simple type schizophrenia, chronic                                     |
| Schizophrenia            | 295.03 | ICD-9  | Simple type schizophrenia, subchronic with acute exacerbation          |
| Schizophrenia            | 295.04 | ICD-9  | Simple type schizophrenia, chronic with acute exacerbation             |
| Schizophrenia            | 295.05 | ICD-9  | Simple type schizophrenia, in remission                                |
| Schizophrenia            | 295.1  | ICD-9  | Disorganized type schizophrenia, unspecified                           |
| Schizophrenia            | 295.11 | ICD-9  | Disorganized type schizophrenia, subchronic                            |
| Schizophrenia            | 295.12 | ICD-9  | Disorganized type schizophrenia, chronic                               |
| Schizophrenia            | 295.13 | ICD-9  | Disorganized type schizophrenia, subchronic with acute exacerbation    |
| Schizophrenia            | 295.14 | ICD-9  | Disorganized type schizophrenia, chronic with acute exacerbation       |
| Schizophrenia            | 295.15 | ICD-9  | Disorganized type schizophrenia, in remission                          |
| Schizophrenia            | 295.2  | ICD-9  | Catatonic type schizophrenia, unspecified                              |



## Online supplementary material

|               |        |       |                                                                            |
|---------------|--------|-------|----------------------------------------------------------------------------|
| Schizophrenia | 295.21 | ICD-9 | Catatonic type schizophrenia, subchronic                                   |
| Schizophrenia | 295.22 | ICD-9 | Catatonic type schizophrenia, chronic                                      |
| Schizophrenia | 295.23 | ICD-9 | Catatonic type schizophrenia, subchronic with acute exacerbation           |
| Schizophrenia | 295.24 | ICD-9 | Catatonic type schizophrenia, chronic with acute exacerbation              |
| Schizophrenia | 295.25 | ICD-9 | Catatonic type schizophrenia, in remission                                 |
| Schizophrenia | 295.3  | ICD-9 | Paranoid type schizophrenia, unspecified                                   |
| Schizophrenia | 295.31 | ICD-9 | Paranoid type schizophrenia, subchronic                                    |
| Schizophrenia | 295.32 | ICD-9 | Paranoid type schizophrenia, chronic                                       |
| Schizophrenia | 295.33 | ICD-9 | Paranoid type schizophrenia, subchronic with acute exacerbation            |
| Schizophrenia | 295.34 | ICD-9 | Paranoid type schizophrenia, chronic with acute exacerbation               |
| Schizophrenia | 295.35 | ICD-9 | Paranoid type schizophrenia, in remission                                  |
| Schizophrenia | 295.4  | ICD-9 | Schizophreniform disorder, unspecified                                     |
| Schizophrenia | 295.41 | ICD-9 | Schizophreniform disorder, subchronic                                      |
| Schizophrenia | 295.42 | ICD-9 | Schizophreniform disorder, chronic                                         |
| Schizophrenia | 295.43 | ICD-9 | Schizophreniform disorder, subchronic with acute exacerbation              |
| Schizophrenia | 295.44 | ICD-9 | Schizophreniform disorder, chronic with acute exacerbation                 |
| Schizophrenia | 295.45 | ICD-9 | Schizophreniform disorder, in remission                                    |
| Schizophrenia | 295.5  | ICD-9 | Latent schizophrenia, unspecified                                          |
| Schizophrenia | 295.51 | ICD-9 | Latent schizophrenia, subchronic                                           |
| Schizophrenia | 295.52 | ICD-9 | Latent schizophrenia, chronic                                              |
| Schizophrenia | 295.53 | ICD-9 | Latent schizophrenia, subchronic with acute exacerbation                   |
| Schizophrenia | 295.54 | ICD-9 | Latent schizophrenia, chronic with acute exacerbation                      |
| Schizophrenia | 295.55 | ICD-9 | Latent schizophrenia, in remission                                         |
| Schizophrenia | 295.6  | ICD-9 | Schizophrenic disorders, residual type, unspecified                        |
| Schizophrenia | 295.61 | ICD-9 | Schizophrenic disorders, residual type, subchronic                         |
| Schizophrenia | 295.62 | ICD-9 | Schizophrenic disorders, residual type, chronic                            |
| Schizophrenia | 295.63 | ICD-9 | Schizophrenic disorders, residual type, subchronic with acute exacerbation |
| Schizophrenia | 295.64 | ICD-9 | Schizophrenic disorders, residual type, chronic with acute exacerbation    |
| Schizophrenia | 295.65 | ICD-9 | Schizophrenic disorders, residual type, in remission                       |
| Schizophrenia | 295.8  | ICD-9 | Other specified types of schizophrenia, unspecified                        |
| Schizophrenia | 295.81 | ICD-9 | Other specified types of schizophrenia, subchronic                         |
| Schizophrenia | 295.82 | ICD-9 | Other specified types of schizophrenia, chronic                            |
| Schizophrenia | 295.83 | ICD-9 | Other specified types of schizophrenia, subchronic with acute exacerbation |
| Schizophrenia | 295.84 | ICD-9 | Other specified types of schizophrenia, chronic with acute exacerbation    |
| Schizophrenia | 295.85 | ICD-9 | Other specified types of schizophrenia, in remission                       |

## Online supplementary material

|                         |        |        |                                                               |
|-------------------------|--------|--------|---------------------------------------------------------------|
| Schizophrenia           | 295.9  | ICD-9  | Unspecified schizophrenia, unspecified                        |
| Schizophrenia           | 295.91 | ICD-9  | Unspecified schizophrenia, subchronic                         |
| Schizophrenia           | 295.92 | ICD-9  | Unspecified schizophrenia, chronic                            |
| Schizophrenia           | 295.93 | ICD-9  | Unspecified schizophrenia, subchronic with acute exacerbation |
| Schizophrenia           | 295.94 | ICD-9  | Unspecified schizophrenia, chronic with acute exacerbation    |
| Schizophrenia           | 295.95 | ICD-9  | Unspecified schizophrenia, in remission                       |
| Schizophrenia           | F20.0  | ICD-10 | Paranoid schizophrenia                                        |
| Schizophrenia           | F20.1  | ICD-10 | Disorganized schizophrenia                                    |
| Schizophrenia           | F20.2  | ICD-10 | Catatonic schizophrenia                                       |
| Schizophrenia           | F20.3  | ICD-10 | Undifferentiated schizophrenia                                |
| Schizophrenia           | F20.5  | ICD-10 | Residual schizophrenia                                        |
| Schizophrenia           | F20.81 | ICD-10 | Schizophreniform disorder                                     |
| Schizophrenia           | F20.89 | ICD-10 | Other schizophrenia                                           |
| Schizophrenia           | F20.9  | ICD-10 | Schizophrenia, unspecified                                    |
| Substance-use disorders | 291    | ICD-9  | Alcohol withdrawal delirium                                   |
| Substance-use disorders | 291.1  | ICD-9  | Alcohol-induced persisting amnestic disorder                  |
| Substance-use disorders | 291.2  | ICD-9  | Alcohol-induced persisting dementia                           |
| Substance-use disorders | 291.3  | ICD-9  | Alcohol-induced psychotic disorder with hallucinations        |
| Substance-use disorders | 291.4  | ICD-9  | Idiosyncratic alcohol intoxication                            |
| Substance-use disorders | 291.5  | ICD-9  | Alcohol-induced psychotic disorder with delusions             |
| Substance-use disorders | 291.81 | ICD-9  | Alcohol withdrawal                                            |
| Substance-use disorders | 291.82 | ICD-9  | Alcohol induced sleep disorders                               |
| Substance-use disorders | 291.89 | ICD-9  | Other alcohol-induced mental disorders                        |
| Substance-use disorders | 291.9  | ICD-9  | Unspecified alcohol-induced mental disorders                  |
| Substance-use disorders | 292    | ICD-9  | Drug withdrawal                                               |
| Substance-use disorders | 292.11 | ICD-9  | Drug-induced psychotic disorder with delusions                |
| Substance-use disorders | 292.12 | ICD-9  | Drug-induced psychotic disorder with hallucinations           |
| Substance-use disorders | 292.2  | ICD-9  | Pathological drug intoxication                                |
| Substance-use disorders | 292.81 | ICD-9  | Drug-induced delirium                                         |
| Substance-use disorders | 292.82 | ICD-9  | Drug-induced persisting dementia                              |

## Online supplementary material

|                          |        |       |                                                           |
|--------------------------|--------|-------|-----------------------------------------------------------|
| Substance-use -disorders | 292.83 | ICD-9 | Drug-induced persisting amnestic disorder                 |
| Substance-use -disorders | 292.84 | ICD-9 | Drug-induced mood disorder                                |
| Substance-use -disorders | 292.85 | ICD-9 | Drug induced sleep disorders                              |
| Substance-use -disorders | 292.89 | ICD-9 | Other specified drug-induced mental disorders             |
| Substance-use -disorders | 292.9  | ICD-9 | Unspecified drug-induced mental disorder                  |
| Substance-use -disorders | 303    | ICD-9 | Acute alcoholic intoxication in alcoholism, unspecified   |
| Substance-use -disorders | 303.01 | ICD-9 | Acute alcoholic intoxication in alcoholism, continuous    |
| Substance-use -disorders | 303.02 | ICD-9 | Acute alcoholic intoxication in alcoholism, episodic      |
| Substance-use -disorders | 303.03 | ICD-9 | Acute alcoholic intoxication in alcoholism, in remission  |
| Substance-use -disorders | 303.9  | ICD-9 | Other and unspecified alcohol dependence, unspecified     |
| Substance-use -disorders | 303.91 | ICD-9 | Other and unspecified alcohol dependence, continuous      |
| Substance-use -disorders | 303.92 | ICD-9 | Other and unspecified alcohol dependence, episodic        |
| Substance-use -disorders | 303.93 | ICD-9 | Other and unspecified alcohol dependence, in remission    |
| Substance-use -disorders | 304    | ICD-9 | Opioid type dependence, unspecified                       |
| Substance-use -disorders | 304.01 | ICD-9 | Opioid type dependence, continuous                        |
| Substance-use -disorders | 304.02 | ICD-9 | Opioid type dependence, episodic                          |
| Substance-use -disorders | 304.03 | ICD-9 | Opioid type dependence, in remission                      |
| Substance-use -disorders | 304.1  | ICD-9 | Sedative, hypnotic or anxiolytic dependence, unspecified  |
| Substance-use -disorders | 304.11 | ICD-9 | Sedative, hypnotic or anxiolytic dependence, continuous   |
| Substance-use -disorders | 304.12 | ICD-9 | Sedative, hypnotic or anxiolytic dependence, episodic     |
| Substance-use -disorders | 304.13 | ICD-9 | Sedative, hypnotic or anxiolytic dependence, in remission |
| Substance-use -disorders | 304.2  | ICD-9 | Cocaine dependence, unspecified                           |
| Substance-use -disorders | 304.21 | ICD-9 | Cocaine dependence, continuous                            |
| Substance-use -disorders | 304.22 | ICD-9 | Cocaine dependence, episodic                              |
| Substance-use -disorders | 304.23 | ICD-9 | Cocaine dependence, in remission                          |

## Online supplementary material

|                         |        |       |                                                                               |
|-------------------------|--------|-------|-------------------------------------------------------------------------------|
| Substance-use disorders | 304.3  | ICD-9 | Cannabis dependence, unspecified                                              |
| Substance-use disorders | 304.31 | ICD-9 | Cannabis dependence, continuous                                               |
| Substance-use disorders | 304.32 | ICD-9 | Cannabis dependence, episodic                                                 |
| Substance-use disorders | 304.33 | ICD-9 | Cannabis dependence, in remission                                             |
| Substance-use disorders | 304.4  | ICD-9 | Amphetamine and other psychostimulant dependence, unspecified                 |
| Substance-use disorders | 304.41 | ICD-9 | Amphetamine and other psychostimulant dependence, continuous                  |
| Substance-use disorders | 304.42 | ICD-9 | Amphetamine and other psychostimulant dependence, episodic                    |
| Substance-use disorders | 304.43 | ICD-9 | Amphetamine and other psychostimulant dependence, in remission                |
| Substance-use disorders | 304.5  | ICD-9 | Hallucinogen dependence, unspecified                                          |
| Substance-use disorders | 304.51 | ICD-9 | Hallucinogen dependence, continuous                                           |
| Substance-use disorders | 304.52 | ICD-9 | Hallucinogen dependence, episodic                                             |
| Substance-use disorders | 304.53 | ICD-9 | Hallucinogen dependence, in remission                                         |
| Substance-use disorders | 304.6  | ICD-9 | Other specified drug dependence, unspecified                                  |
| Substance-use disorders | 304.61 | ICD-9 | Other specified drug dependence, continuous                                   |
| Substance-use disorders | 304.62 | ICD-9 | Other specified drug dependence, episodic                                     |
| Substance-use disorders | 304.63 | ICD-9 | Other specified drug dependence, in remission                                 |
| Substance-use disorders | 304.7  | ICD-9 | Combinations of opioid type drug with any other drug dependence, unspecified  |
| Substance-use disorders | 304.71 | ICD-9 | Combinations of opioid type drug with any other drug dependence, continuous   |
| Substance-use disorders | 304.72 | ICD-9 | Combinations of opioid type drug with any other drug dependence, episodic     |
| Substance-use disorders | 304.73 | ICD-9 | Combinations of opioid type drug with any other drug dependence, in remission |
| Substance-use disorders | 304.8  | ICD-9 | Combinations of drug dependence excluding opioid type drug, unspecified       |
| Substance-use disorders | 304.81 | ICD-9 | Combinations of drug dependence excluding opioid type drug, continuous        |
| Substance-use disorders | 304.82 | ICD-9 | Combinations of drug dependence excluding opioid type drug, episodic          |
| Substance-use disorders | 304.83 | ICD-9 | Combinations of drug dependence excluding opioid type drug, in remission      |
| Substance-use disorders | 304.9  | ICD-9 | Unspecified drug dependence, unspecified                                      |

## Online supplementary material

|                          |        |       |                                                      |
|--------------------------|--------|-------|------------------------------------------------------|
| Substance-use -disorders | 304.91 | ICD-9 | Unspecified drug dependence, continuous              |
| Substance-use -disorders | 304.92 | ICD-9 | Unspecified drug dependence, episodic                |
| Substance-use -disorders | 304.93 | ICD-9 | Unspecified drug dependence, in remission            |
| Substance-use -disorders | 305    | ICD-9 | Alcohol abuse, unspecified                           |
| Substance-use -disorders | 305.01 | ICD-9 | Alcohol abuse, continuous                            |
| Substance-use -disorders | 305.02 | ICD-9 | Alcohol abuse, episodic                              |
| Substance-use -disorders | 305.03 | ICD-9 | Alcohol abuse, in remission                          |
| Substance-use -disorders | 305.1  | ICD-9 | Tobacco use disorder                                 |
| Substance-use -disorders | 305.2  | ICD-9 | Cannabis abuse, unspecified                          |
| Substance-use -disorders | 305.21 | ICD-9 | Cannabis abuse, continuous                           |
| Substance-use -disorders | 305.22 | ICD-9 | Cannabis abuse, episodic                             |
| Substance-use -disorders | 305.23 | ICD-9 | Cannabis abuse, in remission                         |
| Substance-use -disorders | 305.3  | ICD-9 | Hallucinogen abuse, unspecified                      |
| Substance-use -disorders | 305.31 | ICD-9 | Hallucinogen abuse, continuous                       |
| Substance-use -disorders | 305.32 | ICD-9 | Hallucinogen abuse, episodic                         |
| Substance-use -disorders | 305.33 | ICD-9 | Hallucinogen abuse, in remission                     |
| Substance-use -disorders | 305.4  | ICD-9 | Sedative, hypnotic or anxiolytic abuse, unspecified  |
| Substance-use -disorders | 305.41 | ICD-9 | Sedative, hypnotic or anxiolytic abuse, continuous   |
| Substance-use -disorders | 305.42 | ICD-9 | Sedative, hypnotic or anxiolytic abuse, episodic     |
| Substance-use -disorders | 305.43 | ICD-9 | Sedative, hypnotic or anxiolytic abuse, in remission |
| Substance-use -disorders | 305.5  | ICD-9 | Opioid abuse, unspecified                            |
| Substance-use -disorders | 305.51 | ICD-9 | Opioid abuse, continuous                             |
| Substance-use -disorders | 305.52 | ICD-9 | Opioid abuse, episodic                               |
| Substance-use -disorders | 305.53 | ICD-9 | Opioid abuse, in remission                           |
| Substance-use -disorders | 305.6  | ICD-9 | Cocaine abuse, unspecified                           |

## Online supplementary material

|                         |         |        |                                                                           |
|-------------------------|---------|--------|---------------------------------------------------------------------------|
| Substance-use disorders | 305.61  | ICD-9  | Cocaine abuse, continuous                                                 |
| Substance-use disorders | 305.62  | ICD-9  | Cocaine abuse, episodic                                                   |
| Substance-use disorders | 305.63  | ICD-9  | Cocaine abuse, in remission                                               |
| Substance-use disorders | 305.7   | ICD-9  | Amphetamine or related acting sympathomimetic abuse, unspecified          |
| Substance-use disorders | 305.71  | ICD-9  | Amphetamine or related acting sympathomimetic abuse, continuous           |
| Substance-use disorders | 305.72  | ICD-9  | Amphetamine or related acting sympathomimetic abuse, episodic             |
| Substance-use disorders | 305.73  | ICD-9  | Amphetamine or related acting sympathomimetic abuse, in remission         |
| Substance-use disorders | 305.8   | ICD-9  | Antidepressant type abuse, unspecified                                    |
| Substance-use disorders | 305.81  | ICD-9  | Antidepressant type abuse, continuous                                     |
| Substance-use disorders | 305.82  | ICD-9  | Antidepressant type abuse, episodic                                       |
| Substance-use disorders | 305.83  | ICD-9  | Antidepressant type abuse, in remission                                   |
| Substance-use disorders | 305.9   | ICD-9  | Other, mixed, or unspecified drug abuse, unspecified                      |
| Substance-use disorders | 305.91  | ICD-9  | Other, mixed, or unspecified drug abuse, continuous                       |
| Substance-use disorders | 305.92  | ICD-9  | Other, mixed, or unspecified drug abuse, episodic                         |
| Substance-use disorders | 305.93  | ICD-9  | Other, mixed, or unspecified drug abuse, in remission                     |
| Substance-use disorders | F10.10  | ICD-10 | Alcohol abuse, uncomplicated                                              |
| Substance-use disorders | F10.11  | ICD-10 | Alcohol abuse, in remission                                               |
| Substance-use disorders | F10.120 | ICD-10 | Alcohol abuse with intoxication, uncomplicated                            |
| Substance-use disorders | F10.121 | ICD-10 | Alcohol abuse with intoxication delirium                                  |
| Substance-use disorders | F10.129 | ICD-10 | Alcohol abuse with intoxication, unspecified                              |
| Substance-use disorders | F10.14  | ICD-10 | Alcohol abuse with alcohol-induced mood disorder                          |
| Substance-use disorders | F10.150 | ICD-10 | Alcohol abuse with alcohol-induced psychotic disorder with delusions      |
| Substance-use disorders | F10.151 | ICD-10 | Alcohol abuse with alcohol-induced psychotic disorder with hallucinations |
| Substance-use disorders | F10.159 | ICD-10 | Alcohol abuse with alcohol-induced psychotic disorder, unspecified        |
| Substance-use disorders | F10.180 | ICD-10 | Alcohol abuse with alcohol-induced anxiety disorder                       |

## Online supplementary material

|                          |         |        |                                                                                |
|--------------------------|---------|--------|--------------------------------------------------------------------------------|
| Substance-use -disorders | F10.181 | ICD-10 | Alcohol abuse with alcohol-induced sexual dysfunction                          |
| Substance-use -disorders | F10.182 | ICD-10 | Alcohol abuse with alcohol-induced sleep disorder                              |
| Substance-use -disorders | F10.188 | ICD-10 | Alcohol abuse with other alcohol-induced disorder                              |
| Substance-use -disorders | F10.19  | ICD-10 | Alcohol abuse with unspecified alcohol-induced disorder                        |
| Substance-use -disorders | F10.20  | ICD-10 | Alcohol dependence, uncomplicated                                              |
| Substance-use -disorders | F10.21  | ICD-10 | Alcohol dependence, in remission                                               |
| Substance-use -disorders | F10.220 | ICD-10 | Alcohol dependence with intoxication, uncomplicated                            |
| Substance-use -disorders | F10.221 | ICD-10 | Alcohol dependence with intoxication delirium                                  |
| Substance-use -disorders | F10.229 | ICD-10 | Alcohol dependence with intoxication, unspecified                              |
| Substance-use -disorders | F10.230 | ICD-10 | Alcohol dependence with withdrawal, uncomplicated                              |
| Substance-use -disorders | F10.231 | ICD-10 | Alcohol dependence with withdrawal delirium                                    |
| Substance-use -disorders | F10.232 | ICD-10 | Alcohol dependence with withdrawal with perceptual disturbance                 |
| Substance-use -disorders | F10.239 | ICD-10 | Alcohol dependence with withdrawal, unspecified                                |
| Substance-use -disorders | F10.24  | ICD-10 | Alcohol dependence with alcohol-induced mood disorder                          |
| Substance-use -disorders | F10.250 | ICD-10 | Alcohol dependence with alcohol-induced psychotic disorder with delusions      |
| Substance-use -disorders | F10.251 | ICD-10 | Alcohol dependence with alcohol-induced psychotic disorder with hallucinations |
| Substance-use -disorders | F10.259 | ICD-10 | Alcohol dependence with alcohol-induced psychotic disorder, unspecified        |
| Substance-use -disorders | F10.26  | ICD-10 | Alcohol dependence with alcohol-induced persisting amnestic disorder           |
| Substance-use -disorders | F10.27  | ICD-10 | Alcohol dependence with alcohol-induced persisting dementia                    |
| Substance-use -disorders | F10.280 | ICD-10 | Alcohol dependence with alcohol-induced anxiety disorder                       |
| Substance-use -disorders | F10.281 | ICD-10 | Alcohol dependence with alcohol-induced sexual dysfunction                     |
| Substance-use -disorders | F10.282 | ICD-10 | Alcohol dependence with alcohol-induced sleep disorder                         |
| Substance-use -disorders | F10.288 | ICD-10 | Alcohol dependence with other alcohol-induced disorder                         |
| Substance-use -disorders | F10.29  | ICD-10 | Alcohol dependence with unspecified alcohol-induced disorder                   |
| Substance-use -disorders | F10.920 | ICD-10 | Alcohol use, unspecified with intoxication, uncomplicated                      |

## Online supplementary material

|                         |         |        |                                                                                      |
|-------------------------|---------|--------|--------------------------------------------------------------------------------------|
| Substance-use disorders | F10.921 | ICD-10 | Alcohol use, unspecified with intoxication delirium                                  |
| Substance-use disorders | F10.929 | ICD-10 | Alcohol use, unspecified with intoxication, unspecified                              |
| Substance-use disorders | F10.94  | ICD-10 | Alcohol use, unspecified with alcohol-induced mood disorder                          |
| Substance-use disorders | F10.950 | ICD-10 | Alcohol use, unspecified with alcohol-induced psychotic disorder with delusions      |
| Substance-use disorders | F10.951 | ICD-10 | Alcohol use, unspecified with alcohol-induced psychotic disorder with hallucinations |
| Substance-use disorders | F10.959 | ICD-10 | Alcohol use, unspecified with alcohol-induced psychotic disorder, unspecified        |
| Substance-use disorders | F10.96  | ICD-10 | Alcohol use, unspecified with alcohol-induced persisting amnesic disorder            |
| Substance-use disorders | F10.97  | ICD-10 | Alcohol use, unspecified with alcohol-induced persisting dementia                    |
| Substance-use disorders | F10.980 | ICD-10 | Alcohol use, unspecified with alcohol-induced anxiety disorder                       |
| Substance-use disorders | F10.981 | ICD-10 | Alcohol use, unspecified with alcohol-induced sexual dysfunction                     |
| Substance-use disorders | F10.982 | ICD-10 | Alcohol use, unspecified with alcohol-induced sleep disorder                         |
| Substance-use disorders | F10.988 | ICD-10 | Alcohol use, unspecified with other alcohol-induced disorder                         |
| Substance-use disorders | F10.99  | ICD-10 | Alcohol use, unspecified with unspecified alcohol-induced disorder                   |
| Substance-use disorders | F11.10  | ICD-10 | Opioid abuse, uncomplicated                                                          |
| Substance-use disorders | F11.11  | ICD-10 | Opioid abuse, in remission                                                           |
| Substance-use disorders | F11.120 | ICD-10 | Opioid abuse with intoxication, uncomplicated                                        |
| Substance-use disorders | F11.121 | ICD-10 | Opioid abuse with intoxication delirium                                              |
| Substance-use disorders | F11.122 | ICD-10 | Opioid abuse with intoxication with perceptual disturbance                           |
| Substance-use disorders | F11.129 | ICD-10 | Opioid abuse with intoxication, unspecified                                          |
| Substance-use disorders | F11.14  | ICD-10 | Opioid abuse with opioid-induced mood disorder                                       |
| Substance-use disorders | F11.150 | ICD-10 | Opioid abuse with opioid-induced psychotic disorder with delusions                   |
| Substance-use disorders | F11.151 | ICD-10 | Opioid abuse with opioid-induced psychotic disorder with hallucinations              |
| Substance-use disorders | F11.159 | ICD-10 | Opioid abuse with opioid-induced psychotic disorder, unspecified                     |
| Substance-use disorders | F11.181 | ICD-10 | Opioid abuse with opioid-induced sexual dysfunction                                  |
| Substance-use disorders | F11.182 | ICD-10 | Opioid abuse with opioid-induced sleep disorder                                      |



## Online supplementary material

|                         |         |        |                                                                               |
|-------------------------|---------|--------|-------------------------------------------------------------------------------|
| Substance-use disorders | F11.188 | ICD-10 | Opioid abuse with other opioid-induced disorder                               |
| Substance-use disorders | F11.19  | ICD-10 | Opioid abuse with unspecified opioid-induced disorder                         |
| Substance-use disorders | F11.20  | ICD-10 | Opioid dependence, uncomplicated                                              |
| Substance-use disorders | F11.21  | ICD-10 | Opioid dependence, in remission                                               |
| Substance-use disorders | F11.220 | ICD-10 | Opioid dependence with intoxication, uncomplicated                            |
| Substance-use disorders | F11.221 | ICD-10 | Opioid dependence with intoxication delirium                                  |
| Substance-use disorders | F11.222 | ICD-10 | Opioid dependence with intoxication with perceptual disturbance               |
| Substance-use disorders | F11.229 | ICD-10 | Opioid dependence with intoxication, unspecified                              |
| Substance-use disorders | F11.23  | ICD-10 | Opioid dependence with withdrawal                                             |
| Substance-use disorders | F11.24  | ICD-10 | Opioid dependence with opioid-induced mood disorder                           |
| Substance-use disorders | F11.250 | ICD-10 | Opioid dependence with opioid-induced psychotic disorder with delusions       |
| Substance-use disorders | F11.251 | ICD-10 | Opioid dependence with opioid-induced psychotic disorder with hallucinations  |
| Substance-use disorders | F11.259 | ICD-10 | Opioid dependence with opioid-induced psychotic disorder, unspecified         |
| Substance-use disorders | F11.281 | ICD-10 | Opioid dependence with opioid-induced sexual dysfunction                      |
| Substance-use disorders | F11.282 | ICD-10 | Opioid dependence with opioid-induced sleep disorder                          |
| Substance-use disorders | F11.288 | ICD-10 | Opioid dependence with other opioid-induced disorder                          |
| Substance-use disorders | F11.29  | ICD-10 | Opioid dependence with unspecified opioid-induced disorder                    |
| Substance-use disorders | F11.90  | ICD-10 | Opioid use, unspecified, uncomplicated                                        |
| Substance-use disorders | F11.920 | ICD-10 | Opioid use, unspecified with intoxication, uncomplicated                      |
| Substance-use disorders | F11.921 | ICD-10 | Opioid use, unspecified with intoxication delirium                            |
| Substance-use disorders | F11.922 | ICD-10 | Opioid use, unspecified with intoxication with perceptual disturbance         |
| Substance-use disorders | F11.929 | ICD-10 | Opioid use, unspecified with intoxication, unspecified                        |
| Substance-use disorders | F11.93  | ICD-10 | Opioid use, unspecified with withdrawal                                       |
| Substance-use disorders | F11.94  | ICD-10 | Opioid use, unspecified with opioid-induced mood disorder                     |
| Substance-use disorders | F11.950 | ICD-10 | Opioid use, unspecified with opioid-induced psychotic disorder with delusions |

## Online supplementary material

|                          |         |        |                                                                                    |
|--------------------------|---------|--------|------------------------------------------------------------------------------------|
| Substance-use -disorders | F11.951 | ICD-10 | Opioid use, unspecified with opioid-induced psychotic disorder with hallucinations |
| Substance-use -disorders | F11.959 | ICD-10 | Opioid use, unspecified with opioid-induced psychotic disorder, unspecified        |
| Substance-use -disorders | F11.981 | ICD-10 | Opioid use, unspecified with opioid-induced sexual dysfunction                     |
| Substance-use -disorders | F11.982 | ICD-10 | Opioid use, unspecified with opioid-induced sleep disorder                         |
| Substance-use -disorders | F11.988 | ICD-10 | Opioid use, unspecified with other opioid-induced disorder                         |
| Substance-use -disorders | F11.99  | ICD-10 | Opioid use, unspecified with unspecified opioid-induced disorder                   |
| Substance-use -disorders | F12.10  | ICD-10 | Cannabis abuse, uncomplicated                                                      |
| Substance-use -disorders | F12.11  | ICD-10 | Cannabis abuse, in remission                                                       |
| Substance-use -disorders | F12.120 | ICD-10 | Cannabis abuse with intoxication, uncomplicated                                    |
| Substance-use -disorders | F12.121 | ICD-10 | Cannabis abuse with intoxication delirium                                          |
| Substance-use -disorders | F12.122 | ICD-10 | Cannabis abuse with intoxication with perceptual disturbance                       |
| Substance-use -disorders | F12.129 | ICD-10 | Cannabis abuse with intoxication, unspecified                                      |
| Substance-use -disorders | F12.150 | ICD-10 | Cannabis abuse with psychotic disorder with delusions                              |
| Substance-use -disorders | F12.151 | ICD-10 | Cannabis abuse with psychotic disorder with hallucinations                         |
| Substance-use -disorders | F12.159 | ICD-10 | Cannabis abuse with psychotic disorder, unspecified                                |
| Substance-use -disorders | F12.180 | ICD-10 | Cannabis abuse with cannabis-induced anxiety disorder                              |
| Substance-use -disorders | F12.188 | ICD-10 | Cannabis abuse with other cannabis-induced disorder                                |
| Substance-use -disorders | F12.19  | ICD-10 | Cannabis abuse with unspecified cannabis-induced disorder                          |
| Substance-use -disorders | F12.20  | ICD-10 | Cannabis dependence, uncomplicated                                                 |
| Substance-use -disorders | F12.21  | ICD-10 | Cannabis dependence, in remission                                                  |
| Substance-use -disorders | F12.220 | ICD-10 | Cannabis dependence with intoxication, uncomplicated                               |
| Substance-use -disorders | F12.221 | ICD-10 | Cannabis dependence with intoxication delirium                                     |
| Substance-use -disorders | F12.222 | ICD-10 | Cannabis dependence with intoxication with perceptual disturbance                  |
| Substance-use -disorders | F12.229 | ICD-10 | Cannabis dependence with intoxication, unspecified                                 |
| Substance-use -disorders | F12.250 | ICD-10 | Cannabis dependence with psychotic disorder with delusions                         |

## Online supplementary material

|                          |         |        |                                                                                                                             |
|--------------------------|---------|--------|-----------------------------------------------------------------------------------------------------------------------------|
| Substance-use -disorders | F12.251 | ICD-10 | Cannabis dependence with psychotic disorder with hallucinations                                                             |
| Substance-use -disorders | F12.259 | ICD-10 | Cannabis dependence with psychotic disorder, unspecified                                                                    |
| Substance-use -disorders | F12.280 | ICD-10 | Cannabis dependence with cannabis-induced anxiety disorder                                                                  |
| Substance-use -disorders | F12.288 | ICD-10 | Cannabis dependence with other cannabis-induced disorder                                                                    |
| Substance-use -disorders | F12.29  | ICD-10 | Cannabis dependence with unspecified cannabis-induced disorder                                                              |
| Substance-use -disorders | F12.90  | ICD-10 | Cannabis use, unspecified, uncomplicated                                                                                    |
| Substance-use -disorders | F12.920 | ICD-10 | Cannabis use, unspecified with intoxication, uncomplicated                                                                  |
| Substance-use -disorders | F12.921 | ICD-10 | Cannabis use, unspecified with intoxication delirium                                                                        |
| Substance-use -disorders | F12.922 | ICD-10 | Cannabis use, unspecified with intoxication with perceptual disturbance                                                     |
| Substance-use -disorders | F12.929 | ICD-10 | Cannabis use, unspecified with intoxication, unspecified                                                                    |
| Substance-use -disorders | F12.950 | ICD-10 | Cannabis use, unspecified with psychotic disorder with delusions                                                            |
| Substance-use -disorders | F12.951 | ICD-10 | Cannabis use, unspecified with psychotic disorder with hallucinations                                                       |
| Substance-use -disorders | F12.959 | ICD-10 | Cannabis use, unspecified with psychotic disorder, unspecified                                                              |
| Substance-use -disorders | F12.980 | ICD-10 | Cannabis use, unspecified with anxiety disorder                                                                             |
| Substance-use -disorders | F12.988 | ICD-10 | Cannabis use, unspecified with other cannabis-induced disorder                                                              |
| Substance-use -disorders | F12.99  | ICD-10 | Cannabis use, unspecified with unspecified cannabis-induced disorder                                                        |
| Substance-use -disorders | F13.10  | ICD-10 | Sedative, hypnotic or anxiolytic abuse, uncomplicated                                                                       |
| Substance-use -disorders | F13.11  | ICD-10 | Sedative, hypnotic or anxiolytic abuse, in remission                                                                        |
| Substance-use -disorders | F13.120 | ICD-10 | Sedative, hypnotic or anxiolytic abuse with intoxication, uncomplicated                                                     |
| Substance-use -disorders | F13.121 | ICD-10 | Sedative, hypnotic or anxiolytic abuse with intoxication delirium                                                           |
| Substance-use -disorders | F13.129 | ICD-10 | Sedative, hypnotic or anxiolytic abuse with intoxication, unspecified                                                       |
| Substance-use -disorders | F13.14  | ICD-10 | Sedative, hypnotic or anxiolytic abuse with sedative, hypnotic or anxiolytic-induced mood disorder                          |
| Substance-use -disorders | F13.150 | ICD-10 | Sedative, hypnotic or anxiolytic abuse with sedative, hypnotic or anxiolytic-induced psychotic disorder with delusions      |
| Substance-use -disorders | F13.151 | ICD-10 | Sedative, hypnotic or anxiolytic abuse with sedative, hypnotic or anxiolytic-induced psychotic disorder with hallucinations |

## Online supplementary material

|                         |         |        |                                                                                                                                  |
|-------------------------|---------|--------|----------------------------------------------------------------------------------------------------------------------------------|
| Substance-use disorders | F13.159 | ICD-10 | Sedative, hypnotic or anxiolytic abuse with sedative, hypnotic or anxiolytic-induced psychotic disorder, unspecified             |
| Substance-use disorders | F13.180 | ICD-10 | Sedative, hypnotic or anxiolytic abuse with sedative, hypnotic or anxiolytic-induced anxiety disorder                            |
| Substance-use disorders | F13.181 | ICD-10 | Sedative, hypnotic or anxiolytic abuse with sedative, hypnotic or anxiolytic-induced sexual dysfunction                          |
| Substance-use disorders | F13.182 | ICD-10 | Sedative, hypnotic or anxiolytic abuse with sedative, hypnotic or anxiolytic-induced sleep disorder                              |
| Substance-use disorders | F13.188 | ICD-10 | Sedative, hypnotic or anxiolytic abuse with other sedative, hypnotic or anxiolytic-induced disorder                              |
| Substance-use disorders | F13.19  | ICD-10 | Sedative, hypnotic or anxiolytic abuse with unspecified sedative, hypnotic or anxiolytic-induced disorder                        |
| Substance-use disorders | F13.20  | ICD-10 | Sedative, hypnotic or anxiolytic dependence, uncomplicated                                                                       |
| Substance-use disorders | F13.21  | ICD-10 | Sedative, hypnotic or anxiolytic dependence, in remission                                                                        |
| Substance-use disorders | F13.220 | ICD-10 | Sedative, hypnotic or anxiolytic dependence with intoxication, uncomplicated                                                     |
| Substance-use disorders | F13.221 | ICD-10 | Sedative, hypnotic or anxiolytic dependence with intoxication delirium                                                           |
| Substance-use disorders | F13.229 | ICD-10 | Sedative, hypnotic or anxiolytic dependence with intoxication, unspecified                                                       |
| Substance-use disorders | F13.230 | ICD-10 | Sedative, hypnotic or anxiolytic dependence with withdrawal, uncomplicated                                                       |
| Substance-use disorders | F13.231 | ICD-10 | Sedative, hypnotic or anxiolytic dependence with withdrawal delirium                                                             |
| Substance-use disorders | F13.232 | ICD-10 | Sedative, hypnotic or anxiolytic dependence with withdrawal with perceptual disturbance                                          |
| Substance-use disorders | F13.239 | ICD-10 | Sedative, hypnotic or anxiolytic dependence with withdrawal, unspecified                                                         |
| Substance-use disorders | F13.24  | ICD-10 | Sedative, hypnotic or anxiolytic dependence with sedative, hypnotic or anxiolytic-induced mood disorder                          |
| Substance-use disorders | F13.250 | ICD-10 | Sedative, hypnotic or anxiolytic dependence with sedative, hypnotic or anxiolytic-induced psychotic disorder with delusions      |
| Substance-use disorders | F13.251 | ICD-10 | Sedative, hypnotic or anxiolytic dependence with sedative, hypnotic or anxiolytic-induced psychotic disorder with hallucinations |
| Substance-use disorders | F13.259 | ICD-10 | Sedative, hypnotic or anxiolytic dependence with sedative, hypnotic or anxiolytic-induced psychotic disorder, unspecified        |
| Substance-use disorders | F13.26  | ICD-10 | Sedative, hypnotic or anxiolytic dependence with sedative, hypnotic or anxiolytic-induced persisting amnesic disorder            |
| Substance-use disorders | F13.27  | ICD-10 | Sedative, hypnotic or anxiolytic dependence with sedative, hypnotic or anxiolytic-induced persisting dementia                    |
| Substance-use disorders | F13.280 | ICD-10 | Sedative, hypnotic or anxiolytic dependence with sedative, hypnotic or anxiolytic-induced anxiety disorder                       |

## Online supplementary material

|                          |         |        |                                                                                                                                        |
|--------------------------|---------|--------|----------------------------------------------------------------------------------------------------------------------------------------|
| Substance-use -disorders | F13.281 | ICD-10 | Sedative, hypnotic or anxiolytic dependence with sedative, hypnotic or anxiolytic-induced sexual dysfunction                           |
| Substance-use -disorders | F13.282 | ICD-10 | Sedative, hypnotic or anxiolytic dependence with sedative, hypnotic or anxiolytic-induced sleep disorder                               |
| Substance-use -disorders | F13.288 | ICD-10 | Sedative, hypnotic or anxiolytic dependence with other sedative, hypnotic or anxiolytic-induced disorder                               |
| Substance-use -disorders | F13.29  | ICD-10 | Sedative, hypnotic or anxiolytic dependence with unspecified sedative, hypnotic or anxiolytic-induced disorder                         |
| Substance-use -disorders | F13.90  | ICD-10 | Sedative, hypnotic, or anxiolytic use, unspecified, uncomplicated                                                                      |
| Substance-use -disorders | F13.920 | ICD-10 | Sedative, hypnotic or anxiolytic use, unspecified with intoxication, uncomplicated                                                     |
| Substance-use -disorders | F13.921 | ICD-10 | Sedative, hypnotic or anxiolytic use, unspecified with intoxication delirium                                                           |
| Substance-use -disorders | F13.929 | ICD-10 | Sedative, hypnotic or anxiolytic use, unspecified with intoxication, unspecified                                                       |
| Substance-use -disorders | F13.930 | ICD-10 | Sedative, hypnotic or anxiolytic use, unspecified with withdrawal, uncomplicated                                                       |
| Substance-use -disorders | F13.931 | ICD-10 | Sedative, hypnotic or anxiolytic use, unspecified with withdrawal delirium                                                             |
| Substance-use -disorders | F13.932 | ICD-10 | Sedative, hypnotic or anxiolytic use, unspecified with withdrawal with perceptual disturbances                                         |
| Substance-use -disorders | F13.939 | ICD-10 | Sedative, hypnotic or anxiolytic use, unspecified with withdrawal, unspecified                                                         |
| Substance-use -disorders | F13.94  | ICD-10 | Sedative, hypnotic or anxiolytic use, unspecified with sedative, hypnotic or anxiolytic-induced mood disorder                          |
| Substance-use -disorders | F13.950 | ICD-10 | Sedative, hypnotic or anxiolytic use, unspecified with sedative, hypnotic or anxiolytic-induced psychotic disorder with delusions      |
| Substance-use -disorders | F13.951 | ICD-10 | Sedative, hypnotic or anxiolytic use, unspecified with sedative, hypnotic or anxiolytic-induced psychotic disorder with hallucinations |
| Substance-use -disorders | F13.959 | ICD-10 | Sedative, hypnotic or anxiolytic use, unspecified with sedative, hypnotic or anxiolytic-induced psychotic disorder, unspecified        |
| Substance-use -disorders | F13.96  | ICD-10 | Sedative, hypnotic or anxiolytic use, unspecified with sedative, hypnotic or anxiolytic-induced persisting amnesic disorder            |
| Substance-use -disorders | F13.97  | ICD-10 | Sedative, hypnotic or anxiolytic use, unspecified with sedative, hypnotic or anxiolytic-induced persisting dementia                    |
| Substance-use -disorders | F13.980 | ICD-10 | Sedative, hypnotic or anxiolytic use, unspecified with sedative, hypnotic or anxiolytic-induced anxiety disorder                       |
| Substance-use -disorders | F13.981 | ICD-10 | Sedative, hypnotic or anxiolytic use, unspecified with sedative, hypnotic or anxiolytic-induced sexual dysfunction                     |
| Substance-use -disorders | F13.982 | ICD-10 | Sedative, hypnotic or anxiolytic use, unspecified with sedative, hypnotic or anxiolytic-induced sleep disorder                         |

## Online supplementary material

|                         |         |        |                                                                                                                      |
|-------------------------|---------|--------|----------------------------------------------------------------------------------------------------------------------|
| Substance-use disorders | F13.988 | ICD-10 | Sedative, hypnotic or anxiolytic use, unspecified with other sedative, hypnotic or anxiolytic-induced disorder       |
| Substance-use disorders | F13.99  | ICD-10 | Sedative, hypnotic or anxiolytic use, unspecified with unspecified sedative, hypnotic or anxiolytic-induced disorder |
| Substance-use disorders | F14.10  | ICD-10 | Cocaine abuse, uncomplicated                                                                                         |
| Substance-use disorders | F14.11  | ICD-10 | Cocaine abuse, in remission                                                                                          |
| Substance-use disorders | F14.120 | ICD-10 | Cocaine abuse with intoxication, uncomplicated                                                                       |
| Substance-use disorders | F14.121 | ICD-10 | Cocaine abuse with intoxication with delirium                                                                        |
| Substance-use disorders | F14.122 | ICD-10 | Cocaine abuse with intoxication with perceptual disturbance                                                          |
| Substance-use disorders | F14.129 | ICD-10 | Cocaine abuse with intoxication, unspecified                                                                         |
| Substance-use disorders | F14.14  | ICD-10 | Cocaine abuse with cocaine-induced mood disorder                                                                     |
| Substance-use disorders | F14.150 | ICD-10 | Cocaine abuse with cocaine-induced psychotic disorder with delusions                                                 |
| Substance-use disorders | F14.151 | ICD-10 | Cocaine abuse with cocaine-induced psychotic disorder with hallucinations                                            |
| Substance-use disorders | F14.159 | ICD-10 | Cocaine abuse with cocaine-induced psychotic disorder, unspecified                                                   |
| Substance-use disorders | F14.180 | ICD-10 | Cocaine abuse with cocaine-induced anxiety disorder                                                                  |
| Substance-use disorders | F14.181 | ICD-10 | Cocaine abuse with cocaine-induced sexual dysfunction                                                                |
| Substance-use disorders | F14.182 | ICD-10 | Cocaine abuse with cocaine-induced sleep disorder                                                                    |
| Substance-use disorders | F14.188 | ICD-10 | Cocaine abuse with other cocaine-induced disorder                                                                    |
| Substance-use disorders | F14.19  | ICD-10 | Cocaine abuse with unspecified cocaine-induced disorder                                                              |
| Substance-use disorders | F14.20  | ICD-10 | Cocaine dependence, uncomplicated                                                                                    |
| Substance-use disorders | F14.21  | ICD-10 | Cocaine dependence, in remission                                                                                     |
| Substance-use disorders | F14.220 | ICD-10 | Cocaine dependence with intoxication, uncomplicated                                                                  |
| Substance-use disorders | F14.221 | ICD-10 | Cocaine dependence with intoxication delirium                                                                        |
| Substance-use disorders | F14.222 | ICD-10 | Cocaine dependence with intoxication with perceptual disturbance                                                     |
| Substance-use disorders | F14.229 | ICD-10 | Cocaine dependence with intoxication, unspecified                                                                    |
| Substance-use disorders | F14.23  | ICD-10 | Cocaine dependence with withdrawal                                                                                   |
| Substance-use disorders | F14.24  | ICD-10 | Cocaine dependence with cocaine-induced mood disorder                                                                |

## Online supplementary material

|                             |         |        |                                                                                      |
|-----------------------------|---------|--------|--------------------------------------------------------------------------------------|
| Substance-use<br>-disorders | F14.250 | ICD-10 | Cocaine dependence with cocaine-induced psychotic disorder with delusions            |
| Substance-use<br>-disorders | F14.251 | ICD-10 | Cocaine dependence with cocaine-induced psychotic disorder with hallucinations       |
| Substance-use<br>-disorders | F14.259 | ICD-10 | Cocaine dependence with cocaine-induced psychotic disorder, unspecified              |
| Substance-use<br>-disorders | F14.280 | ICD-10 | Cocaine dependence with cocaine-induced anxiety disorder                             |
| Substance-use<br>-disorders | F14.281 | ICD-10 | Cocaine dependence with cocaine-induced sexual dysfunction                           |
| Substance-use<br>-disorders | F14.282 | ICD-10 | Cocaine dependence with cocaine-induced sleep disorder                               |
| Substance-use<br>-disorders | F14.288 | ICD-10 | Cocaine dependence with other cocaine-induced disorder                               |
| Substance-use<br>-disorders | F14.29  | ICD-10 | Cocaine dependence with unspecified cocaine-induced disorder                         |
| Substance-use<br>-disorders | F14.90  | ICD-10 | Cocaine use, unspecified, uncomplicated                                              |
| Substance-use<br>-disorders | F14.920 | ICD-10 | Cocaine use, unspecified with intoxication, uncomplicated                            |
| Substance-use<br>-disorders | F14.921 | ICD-10 | Cocaine use, unspecified with intoxication delirium                                  |
| Substance-use<br>-disorders | F14.922 | ICD-10 | Cocaine use, unspecified with intoxication with perceptual disturbance               |
| Substance-use<br>-disorders | F14.929 | ICD-10 | Cocaine use, unspecified with intoxication, unspecified                              |
| Substance-use<br>-disorders | F14.94  | ICD-10 | Cocaine use, unspecified with cocaine-induced mood disorder                          |
| Substance-use<br>-disorders | F14.950 | ICD-10 | Cocaine use, unspecified with cocaine-induced psychotic disorder with delusions      |
| Substance-use<br>-disorders | F14.951 | ICD-10 | Cocaine use, unspecified with cocaine-induced psychotic disorder with hallucinations |
| Substance-use<br>-disorders | F14.959 | ICD-10 | Cocaine use, unspecified with cocaine-induced psychotic disorder, unspecified        |
| Substance-use<br>-disorders | F14.980 | ICD-10 | Cocaine use, unspecified with cocaine-induced anxiety disorder                       |
| Substance-use<br>-disorders | F14.981 | ICD-10 | Cocaine use, unspecified with cocaine-induced sexual dysfunction                     |
| Substance-use<br>-disorders | F14.982 | ICD-10 | Cocaine use, unspecified with cocaine-induced sleep disorder                         |
| Substance-use<br>-disorders | F14.988 | ICD-10 | Cocaine use, unspecified with other cocaine-induced disorder                         |
| Substance-use<br>-disorders | F14.99  | ICD-10 | Cocaine use, unspecified with unspecified cocaine-induced disorder                   |
| Substance-use<br>-disorders | F15.10  | ICD-10 | Other stimulant abuse, uncomplicated                                                 |
| Substance-use<br>-disorders | F15.11  | ICD-10 | Other stimulant abuse, in remission                                                  |
| Substance-use<br>-disorders | F15.120 | ICD-10 | Other stimulant abuse with intoxication, uncomplicated                               |

## Online supplementary material

|                         |         |        |                                                                                          |
|-------------------------|---------|--------|------------------------------------------------------------------------------------------|
| Substance-use disorders | F15.121 | ICD-10 | Other stimulant abuse with intoxication delirium                                         |
| Substance-use disorders | F15.122 | ICD-10 | Other stimulant abuse with intoxication with perceptual disturbance                      |
| Substance-use disorders | F15.129 | ICD-10 | Other stimulant abuse with intoxication, unspecified                                     |
| Substance-use disorders | F15.14  | ICD-10 | Other stimulant abuse with stimulant-induced mood disorder                               |
| Substance-use disorders | F15.150 | ICD-10 | Other stimulant abuse with stimulant-induced psychotic disorder with delusions           |
| Substance-use disorders | F15.151 | ICD-10 | Other stimulant abuse with stimulant-induced psychotic disorder with hallucinations      |
| Substance-use disorders | F15.159 | ICD-10 | Other stimulant abuse with stimulant-induced psychotic disorder, unspecified             |
| Substance-use disorders | F15.180 | ICD-10 | Other stimulant abuse with stimulant-induced anxiety disorder                            |
| Substance-use disorders | F15.181 | ICD-10 | Other stimulant abuse with stimulant-induced sexual dysfunction                          |
| Substance-use disorders | F15.182 | ICD-10 | Other stimulant abuse with stimulant-induced sleep disorder                              |
| Substance-use disorders | F15.188 | ICD-10 | Other stimulant abuse with other stimulant-induced disorder                              |
| Substance-use disorders | F15.19  | ICD-10 | Other stimulant abuse with unspecified stimulant-induced disorder                        |
| Substance-use disorders | F15.20  | ICD-10 | Other stimulant dependence, uncomplicated                                                |
| Substance-use disorders | F15.21  | ICD-10 | Other stimulant dependence, in remission                                                 |
| Substance-use disorders | F15.220 | ICD-10 | Other stimulant dependence with intoxication, uncomplicated                              |
| Substance-use disorders | F15.221 | ICD-10 | Other stimulant dependence with intoxication delirium                                    |
| Substance-use disorders | F15.222 | ICD-10 | Other stimulant dependence with intoxication with perceptual disturbance                 |
| Substance-use disorders | F15.229 | ICD-10 | Other stimulant dependence with intoxication, unspecified                                |
| Substance-use disorders | F15.23  | ICD-10 | Other stimulant dependence with withdrawal                                               |
| Substance-use disorders | F15.24  | ICD-10 | Other stimulant dependence with stimulant-induced mood disorder                          |
| Substance-use disorders | F15.250 | ICD-10 | Other stimulant dependence with stimulant-induced psychotic disorder with delusions      |
| Substance-use disorders | F15.251 | ICD-10 | Other stimulant dependence with stimulant-induced psychotic disorder with hallucinations |
| Substance-use disorders | F15.259 | ICD-10 | Other stimulant dependence with stimulant-induced psychotic disorder, unspecified        |
| Substance-use disorders | F15.280 | ICD-10 | Other stimulant dependence with stimulant-induced anxiety disorder                       |
| Substance-use disorders | F15.281 | ICD-10 | Other stimulant dependence with stimulant-induced sexual dysfunction                     |



## Online supplementary material

|                         |         |        |                                                                                                |
|-------------------------|---------|--------|------------------------------------------------------------------------------------------------|
| Substance-use disorders | F15.282 | ICD-10 | Other stimulant dependence with stimulant-induced sleep disorder                               |
| Substance-use disorders | F15.288 | ICD-10 | Other stimulant dependence with other stimulant-induced disorder                               |
| Substance-use disorders | F15.29  | ICD-10 | Other stimulant dependence with unspecified stimulant-induced disorder                         |
| Substance-use disorders | F15.90  | ICD-10 | Other stimulant use, unspecified, uncomplicated                                                |
| Substance-use disorders | F15.920 | ICD-10 | Other stimulant use, unspecified with intoxication, uncomplicated                              |
| Substance-use disorders | F15.921 | ICD-10 | Other stimulant use, unspecified with intoxication delirium                                    |
| Substance-use disorders | F15.922 | ICD-10 | Other stimulant use, unspecified with intoxication with perceptual disturbance                 |
| Substance-use disorders | F15.929 | ICD-10 | Other stimulant use, unspecified with intoxication, unspecified                                |
| Substance-use disorders | F15.93  | ICD-10 | Other stimulant use, unspecified with withdrawal                                               |
| Substance-use disorders | F15.94  | ICD-10 | Other stimulant use, unspecified with stimulant-induced mood disorder                          |
| Substance-use disorders | F15.950 | ICD-10 | Other stimulant use, unspecified with stimulant-induced psychotic disorder with delusions      |
| Substance-use disorders | F15.951 | ICD-10 | Other stimulant use, unspecified with stimulant-induced psychotic disorder with hallucinations |
| Substance-use disorders | F15.959 | ICD-10 | Other stimulant use, unspecified with stimulant-induced psychotic disorder, unspecified        |
| Substance-use disorders | F15.980 | ICD-10 | Other stimulant use, unspecified with stimulant-induced anxiety disorder                       |
| Substance-use disorders | F15.981 | ICD-10 | Other stimulant use, unspecified with stimulant-induced sexual dysfunction                     |
| Substance-use disorders | F15.982 | ICD-10 | Other stimulant use, unspecified with stimulant-induced sleep disorder                         |
| Substance-use disorders | F15.988 | ICD-10 | Other stimulant use, unspecified with other stimulant-induced disorder                         |
| Substance-use disorders | F15.99  | ICD-10 | Other stimulant use, unspecified with unspecified stimulant-induced disorder                   |
| Substance-use disorders | F16.10  | ICD-10 | Hallucinogen abuse, uncomplicated                                                              |
| Substance-use disorders | F16.11  | ICD-10 | Hallucinogen abuse, in remission                                                               |
| Substance-use disorders | F16.120 | ICD-10 | Hallucinogen abuse with intoxication, uncomplicated                                            |
| Substance-use disorders | F16.121 | ICD-10 | Hallucinogen abuse with intoxication with delirium                                             |
| Substance-use disorders | F16.122 | ICD-10 | Hallucinogen abuse with intoxication with perceptual disturbance                               |
| Substance-use disorders | F16.129 | ICD-10 | Hallucinogen abuse with intoxication, unspecified                                              |
| Substance-use disorders | F16.14  | ICD-10 | Hallucinogen abuse with hallucinogen-induced mood disorder                                     |

## Online supplementary material

|                          |         |        |                                                                                          |
|--------------------------|---------|--------|------------------------------------------------------------------------------------------|
| Substance-use -disorders | F16.150 | ICD-10 | Hallucinogen abuse with hallucinogen-induced psychotic disorder with delusions           |
| Substance-use -disorders | F16.151 | ICD-10 | Hallucinogen abuse with hallucinogen-induced psychotic disorder with hallucinations      |
| Substance-use -disorders | F16.159 | ICD-10 | Hallucinogen abuse with hallucinogen-induced psychotic disorder, unspecified             |
| Substance-use -disorders | F16.180 | ICD-10 | Hallucinogen abuse with hallucinogen-induced anxiety disorder                            |
| Substance-use -disorders | F16.183 | ICD-10 | Hallucinogen abuse with hallucinogen persisting perception disorder (flashbacks)         |
| Substance-use -disorders | F16.188 | ICD-10 | Hallucinogen abuse with other hallucinogen-induced disorder                              |
| Substance-use -disorders | F16.19  | ICD-10 | Hallucinogen abuse with unspecified hallucinogen-induced disorder                        |
| Substance-use -disorders | F16.20  | ICD-10 | Hallucinogen dependence, uncomplicated                                                   |
| Substance-use -disorders | F16.21  | ICD-10 | Hallucinogen dependence, in remission                                                    |
| Substance-use -disorders | F16.220 | ICD-10 | Hallucinogen dependence with intoxication, uncomplicated                                 |
| Substance-use -disorders | F16.221 | ICD-10 | Hallucinogen dependence with intoxication with delirium                                  |
| Substance-use -disorders | F16.229 | ICD-10 | Hallucinogen dependence with intoxication, unspecified                                   |
| Substance-use -disorders | F16.24  | ICD-10 | Hallucinogen dependence with hallucinogen-induced mood disorder                          |
| Substance-use -disorders | F16.250 | ICD-10 | Hallucinogen dependence with hallucinogen-induced psychotic disorder with delusions      |
| Substance-use -disorders | F16.251 | ICD-10 | Hallucinogen dependence with hallucinogen-induced psychotic disorder with hallucinations |
| Substance-use -disorders | F16.259 | ICD-10 | Hallucinogen dependence with hallucinogen-induced psychotic disorder, unspecified        |
| Substance-use -disorders | F16.280 | ICD-10 | Hallucinogen dependence with hallucinogen-induced anxiety disorder                       |
| Substance-use -disorders | F16.283 | ICD-10 | Hallucinogen dependence with hallucinogen persisting perception disorder (flashbacks)    |
| Substance-use -disorders | F16.288 | ICD-10 | Hallucinogen dependence with other hallucinogen-induced disorder                         |
| Substance-use -disorders | F16.29  | ICD-10 | Hallucinogen dependence with unspecified hallucinogen-induced disorder                   |
| Substance-use -disorders | F16.90  | ICD-10 | Hallucinogen use, unspecified, uncomplicated                                             |
| Substance-use -disorders | F16.920 | ICD-10 | Hallucinogen use, unspecified with intoxication, uncomplicated                           |
| Substance-use -disorders | F16.921 | ICD-10 | Hallucinogen use, unspecified with intoxication with delirium                            |
| Substance-use -disorders | F16.929 | ICD-10 | Hallucinogen use, unspecified with intoxication, unspecified                             |
| Substance-use -disorders | F16.94  | ICD-10 | Hallucinogen use, unspecified with hallucinogen-induced mood disorder                    |

## Online supplementary material

|                          |         |        |                                                                                                |
|--------------------------|---------|--------|------------------------------------------------------------------------------------------------|
| Substance-use -disorders | F16.950 | ICD-10 | Hallucinogen use, unspecified with hallucinogen-induced psychotic disorder with delusions      |
| Substance-use -disorders | F16.951 | ICD-10 | Hallucinogen use, unspecified with hallucinogen-induced psychotic disorder with hallucinations |
| Substance-use -disorders | F16.959 | ICD-10 | Hallucinogen use, unspecified with hallucinogen-induced psychotic disorder, unspecified        |
| Substance-use -disorders | F16.980 | ICD-10 | Hallucinogen use, unspecified with hallucinogen-induced anxiety disorder                       |
| Substance-use -disorders | F16.983 | ICD-10 | Hallucinogen use, unspecified with hallucinogen persisting perception disorder (flashbacks)    |
| Substance-use -disorders | F16.988 | ICD-10 | Hallucinogen use, unspecified with other hallucinogen-induced disorder                         |
| Substance-use -disorders | F16.99  | ICD-10 | Hallucinogen use, unspecified with unspecified hallucinogen-induced disorder                   |
| Substance-use -disorders | F17.200 | ICD-10 | Nicotine dependence, unspecified, uncomplicated                                                |
| Substance-use -disorders | F17.201 | ICD-10 | Nicotine dependence, unspecified, in remission                                                 |
| Substance-use -disorders | F17.203 | ICD-10 | Nicotine dependence unspecified, with withdrawal                                               |
| Substance-use -disorders | F17.208 | ICD-10 | Nicotine dependence, unspecified, with other nicotine-induced disorders                        |
| Substance-use -disorders | F17.209 | ICD-10 | Nicotine dependence, unspecified, with unspecified nicotine-induced disorders                  |
| Substance-use -disorders | F17.210 | ICD-10 | Nicotine dependence, cigarettes, uncomplicated                                                 |
| Substance-use -disorders | F17.211 | ICD-10 | Nicotine dependence, cigarettes, in remission                                                  |
| Substance-use -disorders | F17.213 | ICD-10 | Nicotine dependence, cigarettes, with withdrawal                                               |
| Substance-use -disorders | F17.218 | ICD-10 | Nicotine dependence, cigarettes, with other nicotine-induced disorders                         |
| Substance-use -disorders | F17.219 | ICD-10 | Nicotine dependence, cigarettes, with unspecified nicotine-induced disorders                   |
| Substance-use -disorders | F17.220 | ICD-10 | Nicotine dependence, chewing tobacco, uncomplicated                                            |
| Substance-use -disorders | F17.221 | ICD-10 | Nicotine dependence, chewing tobacco, in remission                                             |
| Substance-use -disorders | F17.223 | ICD-10 | Nicotine dependence, chewing tobacco, with withdrawal                                          |
| Substance-use -disorders | F17.228 | ICD-10 | Nicotine dependence, chewing tobacco, with other nicotine-induced disorders                    |
| Substance-use -disorders | F17.229 | ICD-10 | Nicotine dependence, chewing tobacco, with unspecified nicotine-induced disorders              |
| Substance-use -disorders | F17.290 | ICD-10 | Nicotine dependence, other tobacco product, uncomplicated                                      |
| Substance-use -disorders | F17.291 | ICD-10 | Nicotine dependence, other tobacco product, in remission                                       |
| Substance-use -disorders | F17.293 | ICD-10 | Nicotine dependence, other tobacco product, with withdrawal                                    |

## Online supplementary material

|                         |         |        |                                                                                         |
|-------------------------|---------|--------|-----------------------------------------------------------------------------------------|
| Substance-use disorders | F17.298 | ICD-10 | Nicotine dependence, other tobacco product, with other nicotine-induced disorders       |
| Substance-use disorders | F17.299 | ICD-10 | Nicotine dependence, other tobacco product, with unspecified nicotine-induced disorders |
| Substance-use disorders | F18.10  | ICD-10 | Inhalant abuse, uncomplicated                                                           |
| Substance-use disorders | F18.11  | ICD-10 | Inhalant abuse, in remission                                                            |
| Substance-use disorders | F18.120 | ICD-10 | Inhalant abuse with intoxication, uncomplicated                                         |
| Substance-use disorders | F18.121 | ICD-10 | Inhalant abuse with intoxication delirium                                               |
| Substance-use disorders | F18.129 | ICD-10 | Inhalant abuse with intoxication, unspecified                                           |
| Substance-use disorders | F18.14  | ICD-10 | Inhalant abuse with inhalant-induced mood disorder                                      |
| Substance-use disorders | F18.150 | ICD-10 | Inhalant abuse with inhalant-induced psychotic disorder with delusions                  |
| Substance-use disorders | F18.151 | ICD-10 | Inhalant abuse with inhalant-induced psychotic disorder with hallucinations             |
| Substance-use disorders | F18.159 | ICD-10 | Inhalant abuse with inhalant-induced psychotic disorder, unspecified                    |
| Substance-use disorders | F18.17  | ICD-10 | Inhalant abuse with inhalant-induced dementia                                           |
| Substance-use disorders | F18.180 | ICD-10 | Inhalant abuse with inhalant-induced anxiety disorder                                   |
| Substance-use disorders | F18.188 | ICD-10 | Inhalant abuse with other inhalant-induced disorder                                     |
| Substance-use disorders | F18.19  | ICD-10 | Inhalant abuse with unspecified inhalant-induced disorder                               |
| Substance-use disorders | F18.20  | ICD-10 | Inhalant dependence, uncomplicated                                                      |
| Substance-use disorders | F18.21  | ICD-10 | Inhalant dependence, in remission                                                       |
| Substance-use disorders | F18.220 | ICD-10 | Inhalant dependence with intoxication, uncomplicated                                    |
| Substance-use disorders | F18.221 | ICD-10 | Inhalant dependence with intoxication delirium                                          |
| Substance-use disorders | F18.229 | ICD-10 | Inhalant dependence with intoxication, unspecified                                      |
| Substance-use disorders | F18.24  | ICD-10 | Inhalant dependence with inhalant-induced mood disorder                                 |
| Substance-use disorders | F18.250 | ICD-10 | Inhalant dependence with inhalant-induced psychotic disorder with delusions             |
| Substance-use disorders | F18.251 | ICD-10 | Inhalant dependence with inhalant-induced psychotic disorder with hallucinations        |
| Substance-use disorders | F18.259 | ICD-10 | Inhalant dependence with inhalant-induced psychotic disorder, unspecified               |
| Substance-use disorders | F18.27  | ICD-10 | Inhalant dependence with inhalant-induced dementia                                      |

## Online supplementary material

|                          |         |        |                                                                                                               |
|--------------------------|---------|--------|---------------------------------------------------------------------------------------------------------------|
| Substance-use -disorders | F18.280 | ICD-10 | Inhalant dependence with inhalant-induced anxiety disorder                                                    |
| Substance-use -disorders | F18.288 | ICD-10 | Inhalant dependence with other inhalant-induced disorder                                                      |
| Substance-use -disorders | F18.29  | ICD-10 | Inhalant dependence with unspecified inhalant-induced disorder                                                |
| Substance-use -disorders | F18.90  | ICD-10 | Inhalant use, unspecified, uncomplicated                                                                      |
| Substance-use -disorders | F18.920 | ICD-10 | Inhalant use, unspecified with intoxication, uncomplicated                                                    |
| Substance-use -disorders | F18.921 | ICD-10 | Inhalant use, unspecified with intoxication with delirium                                                     |
| Substance-use -disorders | F18.929 | ICD-10 | Inhalant use, unspecified with intoxication, unspecified                                                      |
| Substance-use -disorders | F18.94  | ICD-10 | Inhalant use, unspecified with inhalant-induced mood disorder                                                 |
| Substance-use -disorders | F18.950 | ICD-10 | Inhalant use, unspecified with inhalant-induced psychotic disorder with delusions                             |
| Substance-use -disorders | F18.951 | ICD-10 | Inhalant use, unspecified with inhalant-induced psychotic disorder with hallucinations                        |
| Substance-use -disorders | F18.959 | ICD-10 | Inhalant use, unspecified with inhalant-induced psychotic disorder, unspecified                               |
| Substance-use -disorders | F18.97  | ICD-10 | Inhalant use, unspecified with inhalant-induced persisting dementia                                           |
| Substance-use -disorders | F18.980 | ICD-10 | Inhalant use, unspecified with inhalant-induced anxiety disorder                                              |
| Substance-use -disorders | F18.988 | ICD-10 | Inhalant use, unspecified with other inhalant-induced disorder                                                |
| Substance-use -disorders | F18.99  | ICD-10 | Inhalant use, unspecified with unspecified inhalant-induced disorder                                          |
| Substance-use -disorders | F19.10  | ICD-10 | Other psychoactive substance abuse, uncomplicated                                                             |
| Substance-use -disorders | F19.11  | ICD-10 | Other psychoactive substance abuse, in remission                                                              |
| Substance-use -disorders | F19.120 | ICD-10 | Other psychoactive substance abuse with intoxication, uncomplicated                                           |
| Substance-use -disorders | F19.121 | ICD-10 | Other psychoactive substance abuse with intoxication delirium                                                 |
| Substance-use -disorders | F19.122 | ICD-10 | Other psychoactive substance abuse with intoxication with perceptual disturbances                             |
| Substance-use -disorders | F19.129 | ICD-10 | Other psychoactive substance abuse with intoxication, unspecified                                             |
| Substance-use -disorders | F19.14  | ICD-10 | Other psychoactive substance abuse with psychoactive substance-induced mood disorder                          |
| Substance-use -disorders | F19.150 | ICD-10 | Other psychoactive substance abuse with psychoactive substance-induced psychotic disorder with delusions      |
| Substance-use -disorders | F19.151 | ICD-10 | Other psychoactive substance abuse with psychoactive substance-induced psychotic disorder with hallucinations |
| Substance-use -disorders | F19.159 | ICD-10 | Other psychoactive substance abuse with psychoactive substance-induced psychotic disorder, unspecified        |

## Online supplementary material

|                          |         |        |                                                                                                                    |
|--------------------------|---------|--------|--------------------------------------------------------------------------------------------------------------------|
| Substance-use -disorders | F19.16  | ICD-10 | Other psychoactive substance abuse with psychoactive substance-induced persisting amnestic disorder                |
| Substance-use -disorders | F19.17  | ICD-10 | Other psychoactive substance abuse with psychoactive substance-induced persisting dementia                         |
| Substance-use -disorders | F19.180 | ICD-10 | Other psychoactive substance abuse with psychoactive substance-induced anxiety disorder                            |
| Substance-use -disorders | F19.181 | ICD-10 | Other psychoactive substance abuse with psychoactive substance-induced sexual dysfunction                          |
| Substance-use -disorders | F19.182 | ICD-10 | Other psychoactive substance abuse with psychoactive substance-induced sleep disorder                              |
| Substance-use -disorders | F19.188 | ICD-10 | Other psychoactive substance abuse with other psychoactive substance-induced disorder                              |
| Substance-use -disorders | F19.19  | ICD-10 | Other psychoactive substance abuse with unspecified psychoactive substance-induced disorder                        |
| Substance-use -disorders | F19.20  | ICD-10 | Other psychoactive substance dependence, uncomplicated                                                             |
| Substance-use -disorders | F19.21  | ICD-10 | Other psychoactive substance dependence, in remission                                                              |
| Substance-use -disorders | F19.220 | ICD-10 | Other psychoactive substance dependence with intoxication, uncomplicated                                           |
| Substance-use -disorders | F19.221 | ICD-10 | Other psychoactive substance dependence with intoxication delirium                                                 |
| Substance-use -disorders | F19.222 | ICD-10 | Other psychoactive substance dependence with intoxication with perceptual disturbance                              |
| Substance-use -disorders | F19.229 | ICD-10 | Other psychoactive substance dependence with intoxication, unspecified                                             |
| Substance-use -disorders | F19.230 | ICD-10 | Other psychoactive substance dependence with withdrawal, uncomplicated                                             |
| Substance-use -disorders | F19.231 | ICD-10 | Other psychoactive substance dependence with withdrawal delirium                                                   |
| Substance-use -disorders | F19.232 | ICD-10 | Other psychoactive substance dependence with withdrawal with perceptual disturbance                                |
| Substance-use -disorders | F19.239 | ICD-10 | Other psychoactive substance dependence with withdrawal, unspecified                                               |
| Substance-use -disorders | F19.24  | ICD-10 | Other psychoactive substance dependence with psychoactive substance-induced mood disorder                          |
| Substance-use -disorders | F19.250 | ICD-10 | Other psychoactive substance dependence with psychoactive substance-induced psychotic disorder with delusions      |
| Substance-use -disorders | F19.251 | ICD-10 | Other psychoactive substance dependence with psychoactive substance-induced psychotic disorder with hallucinations |
| Substance-use -disorders | F19.259 | ICD-10 | Other psychoactive substance dependence with psychoactive substance-induced psychotic disorder, unspecified        |
| Substance-use -disorders | F19.26  | ICD-10 | Other psychoactive substance dependence with psychoactive substance-induced persisting amnestic disorder           |
| Substance-use -disorders | F19.27  | ICD-10 | Other psychoactive substance dependence with psychoactive substance-induced persisting dementia                    |

## Online supplementary material

|                          |         |        |                                                                                                                          |
|--------------------------|---------|--------|--------------------------------------------------------------------------------------------------------------------------|
| Substance-use -disorders | F19.280 | ICD-10 | Other psychoactive substance dependence with psychoactive substance-induced anxiety disorder                             |
| Substance-use -disorders | F19.281 | ICD-10 | Other psychoactive substance dependence with psychoactive substance-induced sexual dysfunction                           |
| Substance-use -disorders | F19.282 | ICD-10 | Other psychoactive substance dependence with psychoactive substance-induced sleep disorder                               |
| Substance-use -disorders | F19.288 | ICD-10 | Other psychoactive substance dependence with other psychoactive substance-induced disorder                               |
| Substance-use -disorders | F19.29  | ICD-10 | Other psychoactive substance dependence with unspecified psychoactive substance-induced disorder                         |
| Substance-use -disorders | F19.90  | ICD-10 | Other psychoactive substance use, unspecified, uncomplicated                                                             |
| Substance-use -disorders | F19.920 | ICD-10 | Other psychoactive substance use, unspecified with intoxication, uncomplicated                                           |
| Substance-use -disorders | F19.921 | ICD-10 | Other psychoactive substance use, unspecified with intoxication with delirium                                            |
| Substance-use -disorders | F19.922 | ICD-10 | Other psychoactive substance use, unspecified with intoxication with perceptual disturbance                              |
| Substance-use -disorders | F19.929 | ICD-10 | Other psychoactive substance use, unspecified with intoxication, unspecified                                             |
| Substance-use -disorders | F19.930 | ICD-10 | Other psychoactive substance use, unspecified with withdrawal, uncomplicated                                             |
| Substance-use -disorders | F19.931 | ICD-10 | Other psychoactive substance use, unspecified with withdrawal delirium                                                   |
| Substance-use -disorders | F19.932 | ICD-10 | Other psychoactive substance use, unspecified with withdrawal with perceptual disturbance                                |
| Substance-use -disorders | F19.939 | ICD-10 | Other psychoactive substance use, unspecified with withdrawal, unspecified                                               |
| Substance-use -disorders | F19.94  | ICD-10 | Other psychoactive substance use, unspecified with psychoactive substance-induced mood disorder                          |
| Substance-use -disorders | F19.950 | ICD-10 | Other psychoactive substance use, unspecified with psychoactive substance-induced psychotic disorder with delusions      |
| Substance-use -disorders | F19.951 | ICD-10 | Other psychoactive substance use, unspecified with psychoactive substance-induced psychotic disorder with hallucinations |
| Substance-use -disorders | F19.959 | ICD-10 | Other psychoactive substance use, unspecified with psychoactive substance-induced psychotic disorder, unspecified        |
| Substance-use -disorders | F19.96  | ICD-10 | Other psychoactive substance use, unspecified with psychoactive substance-induced persisting amnesic disorder            |
| Substance-use -disorders | F19.97  | ICD-10 | Other psychoactive substance use, unspecified with psychoactive substance-induced persisting dementia                    |
| Substance-use -disorders | F19.980 | ICD-10 | Other psychoactive substance use, unspecified with psychoactive substance-induced anxiety disorder                       |
| Substance-use -disorders | F19.981 | ICD-10 | Other psychoactive substance use, unspecified with psychoactive substance-induced sexual dysfunction                     |
| Substance-use -disorders | F19.982 | ICD-10 | Other psychoactive substance use, unspecified with psychoactive substance-induced sleep disorder                         |

**Online supplementary material**

|                             |         |        |                                                                                                        |
|-----------------------------|---------|--------|--------------------------------------------------------------------------------------------------------|
| Substance-use<br>-disorders | F19.988 | ICD-10 | Other psychoactive substance use, unspecified with other psychoactive substance-induced disorder       |
| Substance-use<br>-disorders | F19.99  | ICD-10 | Other psychoactive substance use, unspecified with unspecified psychoactive substance-induced disorder |



## Online supplementary material

eTable 7: U.S. State of Residence

| State of residence | Full name      | Number of patients | Percentage |
|--------------------|----------------|--------------------|------------|
| CO                 | Colorado       | 125,267            | 23.0%      |
| NY                 | New York       | 103,016            | 18.9%      |
| MO                 | Missouri       | 98,450             | 18.1%      |
| NC                 | North Carolina | 75,626             | 13.9%      |
| IN                 | Indiana        | 52,699             | 9.7%       |
| VA                 | Virginia       | 23,848             | 4.4%       |
| KY                 | Kentucky       | 18,102             | 3.3%       |
| VT                 | Vermont        | 8,473              | 1.6%       |
| DE                 | Delaware       | 7,313              | 1.3%       |
| AK                 | Alaska         | 4,776              | 0.9%       |
| MT                 | Montana        | 4,696              | 0.9%       |
| AL                 | Alabama        | 3,459              | 0.6%       |
| NJ                 | New Jersey     | 2,074              | 0.4%       |
| IL                 | Illinois       | 1,994              | 0.4%       |
| SC                 | South Carolina | 1,193              | 0.2%       |
| CT                 | Connecticut    | 1,125              | 0.2%       |
| KS                 | Kansas         | 1,007              | 0.2%       |
| FL                 | Florida        | 932                | 0.2%       |
| NH                 | New Hampshire  | 695                | 0.1%       |
| CA                 | California     | 679                | 0.1%       |
| GA                 | Georgia        | 536                | 0.1%       |
| PA                 | Pennsylvania   | 506                | 0.1%       |
| TX                 | Texas          | 473                | 0.1%       |
| MD                 | Maryland       | 451                | 0.1%       |
| TN                 | Tennessee      | 448                | 0.1%       |
| OH                 | Ohio           | 309                | 0.1%       |
| WV                 | West Virginia  | 297                | 0.1%       |
| MI                 | Michigan       | 272                | 0.1%       |
| MA                 | Massachusetts  | 258                | 0.0%       |
| WY                 | Wyoming        | 213                | 0.0%       |
| MN                 | Minnesota      | 199                | 0.0%       |
| AZ                 | Arizona        | 170                | 0.0%       |
| WA                 | Washington     | 147                | 0.0%       |
| NM                 | New Mexico     | 135                | 0.0%       |
| WI                 | Wisconsin      | 111                | 0.0%       |
| NE                 | Nebraska       | 98                 | 0.0%       |
| OK                 | Oklahoma       | 90                 | 0.0%       |
| LA                 | Louisiana      | 88                 | 0.0%       |
| IA                 | Iowa           | 82                 | 0.0%       |
| AR                 | Arkansas       | 78                 | 0.0%       |

**Online supplementary material**

|           |                      |     |      |
|-----------|----------------------|-----|------|
| <b>OR</b> | Oregon               | 77  | 0.0% |
| <b>SD</b> | South Dakota         | 73  | 0.0% |
| <b>UT</b> | Utah                 | 71  | 0.0% |
| <b>DC</b> | District of Columbia | 67  | 0.0% |
| <b>ND</b> | North Dakota         | 63  | 0.0% |
| <b>NV</b> | Nevada               | 60  | 0.0% |
| <b>MS</b> | Mississippi          | 53  | 0.0% |
| <b>RI</b> | Rhode Island         | 42  | 0.0% |
| <b>ME</b> | Maine                | 42  | 0.0% |
| <b>PR</b> | Puerto Rico          | 30  | 0.0% |
| <b>ID</b> | Idaho                | 26  | 0.0% |
| <b>HI</b> | Hawaii               | 23  | 0.0% |
| <b>AE</b> | Armed Forces Europe  | <20 | 0.0% |
| <b>AP</b> | Armed Forces Pacific | <20 | 0.0% |

## Online supplementary material

eTable 8: Mean CGI-S score by diagnosis

| Diagnosis                                              | Number of patients | Mean CGI-S | 95% Confidence Interval | Standard deviation |
|--------------------------------------------------------|--------------------|------------|-------------------------|--------------------|
| <b>Dementia &amp; Alzheimer's disease</b>              | 5,029              | 4.33       | 4.30 to 4.37            | 1.36               |
| <b>Substance-use disorders</b>                         | 152,790            | 3.61       | 3.60 to 3.62            | 1.80               |
| <b>Schizophrenia</b>                                   | 14,592             | 4.44       | 4.41 to 4.46            | 1.44               |
| <b>Schizoaffective disorder</b>                        | 15,044             | 4.48       | 4.45 to 4.50            | 1.42               |
| <b>Bipolar disorder</b>                                | 69,607             | 4.28       | 4.27 to 4.29            | 1.45               |
| <b>Major depressive disorder (MDD)</b>                 | 129,120            | 4.21       | 4.20 to 4.22            | 1.42               |
| <b>Anxiety disorders</b>                               | 103,923            | 4.02       | 4.01 to 4.03            | 1.53               |
| <b>Attention-deficit hyperactivity disorder (ADHD)</b> | 53,744             | 3.99       | 3.97 to 4.00            | 1.42               |

Note: Confidence intervals were estimated using the formula mean +/- error margin where:  
Error margin = std/sqrt(N) \* Z, Z = 1.96 for 95% confidence interval

## Online supplementary material

eTable 9: Mean maximum and minimum CGI-S score by diagnosis

| Diagnosis                                              | Number of patients with at least 2 CGI-S data points | Max CGI-S Mean | Min CGI-S Mean | Max CGI-S Std dev | Min CGI-S Std dev | Max CGI-S Confidence Interval | Min CGI-S Confidence Interval |
|--------------------------------------------------------|------------------------------------------------------|----------------|----------------|-------------------|-------------------|-------------------------------|-------------------------------|
| <b>Dementia &amp; Alzheimer's disease</b>              | 2,980                                                | 5.10           | 3.32           | 1.06              | 1.56              | 5.06 to 5.14                  | 3.26 to 3.37                  |
| <b>Substance-use disorders</b>                         | 107,939                                              | 4.85           | 2.55           | 1.32              | 1.62              | 4.84 to 4.85                  | 2.54 to 2.56                  |
| <b>Schizophrenia</b>                                   | 12,465                                               | 5.41           | 2.90           | 1.01              | 1.55              | 5.40 to 5.43                  | 2.87 to 2.93                  |
| <b>Schizoaffective disorder</b>                        | 13,590                                               | 5.53           | 2.88           | 0.95              | 1.55              | 5.51 to 5.55                  | 2.86 to 2.91                  |
| <b>Bipolar disorder</b>                                | 59,222                                               | 5.22           | 3.02           | 0.98              | 1.54              | 5.21 to 5.23                  | 3.00 to 3.03                  |
| <b>Major depressive disorder (MDD)</b>                 | 103,933                                              | 5.02           | 3.03           | 0.98              | 1.53              | 5.01 to 5.03                  | 3.03 to 3.04                  |
| <b>Anxiety disorders</b>                               | 89,710                                               | 5.04           | 2.80           | 0.97              | 1.58              | 5.03 to 5.04                  | 2.79 to 2.81                  |
| <b>Attention-deficit hyperactivity disorder (ADHD)</b> | 47,591                                               | 4.92           | 2.75           | 1.00              | 1.50              | 4.91 to 4.93                  | 2.73 to 2.76                  |

Note: Confidence intervals were estimated using the formula mean +/- error margin where:  
Error margin =  $\text{std}/\sqrt{N} * Z$ ,  $Z = 1.96$  for 95% confidence interval

## Online supplementary material

eTable 10: Number of patients with at least one hospital visit by diagnosis

| Diagnosis                                                            | Number of patients | Number of hospitalized patients | Percentage |
|----------------------------------------------------------------------|--------------------|---------------------------------|------------|
| <b>Dementia &amp; Alzheimer's disease</b>                            | 5,029              | 2,625                           | 52.2%      |
| <b>Substance-use disorders</b>                                       | 152,790            | 54,267                          | 35.5%      |
| <b>Schizophrenia</b>                                                 | 14,592             | 8,123                           | 55.7%      |
| <b>Schizoaffective disorder</b>                                      | 15,044             | 8,528                           | 56.7%      |
| <b>Bipolar disorder</b>                                              | 69,607             | 25,322                          | 36.4%      |
| <b>Major depressive disorder (MDD)</b>                               | 129,120            | 40,726                          | 31.5%      |
| <b>Anxiety disorders</b>                                             | 103,923            | 22,455                          | 21.6%      |
| <b>Attention-deficit hyperactivity disorder (ADHD)</b>               | 53,744             | 8,587                           | 16.0%      |
| Note: Hospitalization includes both inpatient and emergency services |                    |                                 |            |

## Online supplementary material

eTable 11: SAV features included in MSE NLP analysis (eTable 12)

| Category         | Description                                            | SAV number                  |
|------------------|--------------------------------------------------------|-----------------------------|
| <b>Delusions</b> | experiencing delusions/abnormal thoughts (grandeur)    | sav_1_aopt_1                |
| <b>Delusions</b> | experiencing delusions/abnormal thoughts (persecution) | sav_2_aopt_2                |
| <b>Delusions</b> | experiencing delusions/abnormal thoughts (religious)   | sav_3_aopt_3                |
| <b>Delusions</b> | experiencing hallucinations (auditory)                 | sav_4_aopt_4                |
| <b>Delusions</b> | experiencing hallucinations (visual)                   | sav_5_aopt_5                |
| <b>Delusions</b> | experiencing hallucinations (tactile)                  | sav_6_aopt_6                |
| <b>Delusions</b> | History of delusions/abnormal thoughts                 | sav_7_aopt_7                |
| <b>Delusions</b> | History of hallucinations                              | sav_8_aopt_8                |
| <b>Delusions</b> | experiencing delusions (not specified)                 | sav_10_aopt_10              |
| <b>Delusions</b> | experiencing hallucinations (not specified)            | sav_11_aopt_11              |
| <b>Delusions</b> | experiencing delusions/abnormal thoughts (paranoia)    | sav_13_aopt_13              |
| <b>Delusions</b> | experiencing hallucinations (olfactory)                | sav_14_aopt_14              |
| <b>Delusions</b> | responding to internal stimuli                         | sav_15_aopt_15              |
| <b>Delusions</b> | experiencing delusions/abnormal thoughts (sexual)      | sav_16_aopt_16              |
| <b>Mood</b>      | "anxious, tense"                                       | sav_158_mood_2              |
| <b>Mood</b>      | "depressed, sad, despondent"                           | sav_159_mood_3              |
| <b>Mood</b>      | "irritable, angry"                                     | sav_160_mood_4              |
| <b>Mood</b>      | declined                                               | sav_162_mood_6              |
| <b>Mood</b>      | "elevated, manic"                                      | sav_163_mood_7              |
| <b>Mood</b>      | labile                                                 | sav_164_mood_8              |
| <b>Mood</b>      | misc. issues                                           | sav_165_mood_9              |
| <b>Mood</b>      | suicidal                                               | sav_166_mood_10             |
| <b>Cognition</b> | general issues                                         | sav_65_attn_concentration_2 |
| <b>Cognition</b> | declined                                               | sav_67_attn_concentration_4 |
| <b>Cognition</b> | issues due to MH                                       | sav_69_attn_concentration_6 |
| <b>Cognition</b> | issues due to DD                                       | sav_70_attn_concentration_7 |
| <b>Cognition</b> | varying                                                | sav_71_attn_concentration_8 |
| <b>Cognition</b> | issues with concentration                              | sav_81_cognition_2          |
| <b>Cognition</b> | issues with fund of knowledge                          | sav_83_cognition_4          |
| <b>Cognition</b> | issues with attention                                  | sav_85_cognition_6          |
| <b>Cognition</b> | general issues                                         | sav_87_cognition_8          |
| <b>Cognition</b> | some impairment                                        | sav_90_exec_functioning_2   |
| <b>Cognition</b> | much impairment                                        | sav_91_exec_functioning_3   |
| <b>Cognition</b> | declined since last session                            | sav_93_exec_functioning_5   |
| <b>Cognition</b> | below age level                                        | sav_95_exec_functioning_7   |
| <b>Cognition</b> | impaired (due to DD)                                   | sav_96_exec_functioning_8   |
| <b>Cognition</b> | impaired (due to TBI)                                  | sav_97_exec_functioning_9   |
| <b>Cognition</b> | impaired (due to other MH issue)                       | sav_98_exec_functioning_10  |

## Online supplementary material

eTable 12: Number of patients with at least one MSE feature by diagnosis

| Diagnosis                                       | MSE Category               | Number of patients | Number of patients with at least one MSE feature | Percentage |
|-------------------------------------------------|----------------------------|--------------------|--------------------------------------------------|------------|
| Dementia & Alzheimer's disease                  | Delusions & hallucinations | 5,029              | 2,147                                            | 42.7%      |
| Dementia & Alzheimer's disease                  | Mood                       | 5,029              | 2,518                                            | 50.1%      |
| Dementia & Alzheimer's disease                  | Cognition                  | 5,029              | 2,719                                            | 54.1%      |
| Substance-use disorders                         | Delusions & hallucinations | 152,790            | 37,455                                           | 24.5%      |
| Substance-use disorders                         | Mood                       | 152,790            | 89,616                                           | 58.7%      |
| Substance-use disorders                         | Cognition                  | 152,790            | 26,461                                           | 17.3%      |
| Schizophrenia                                   | Delusions & hallucinations | 14,592             | 11,513                                           | 78.9%      |
| Schizophrenia                                   | Mood                       | 14,592             | 10,753                                           | 73.7%      |
| Schizophrenia                                   | Cognition                  | 14,592             | 6,418                                            | 44.0%      |
| Schizoaffective disorder                        | Delusions & hallucinations | 15,044             | 11,885                                           | 79.0%      |
| Schizoaffective disorder                        | Mood                       | 15,044             | 12,278                                           | 81.6%      |
| Schizoaffective disorder                        | Cognition                  | 15,044             | 6,785                                            | 45.1%      |
| Bipolar disorder                                | Delusions & hallucinations | 69,607             | 33,179                                           | 47.7%      |
| Bipolar disorder                                | Mood                       | 69,607             | 55,472                                           | 79.7%      |
| Bipolar disorder                                | Cognition                  | 69,607             | 23,373                                           | 33.6%      |
| Major depressive disorder (MDD)                 | Delusions & hallucinations | 129,120            | 42,566                                           | 33.0%      |
| Major depressive disorder (MDD)                 | Mood                       | 129,120            | 100,182                                          | 77.6%      |
| Major depressive disorder (MDD)                 | Cognition                  | 129,120            | 28,986                                           | 22.4%      |
| Anxiety disorders                               | Delusions & hallucinations | 103,923            | 32,059                                           | 30.8%      |
| Anxiety disorders                               | Mood                       | 103,923            | 76,320                                           | 73.4%      |
| Anxiety disorders                               | Cognition                  | 103,923            | 25,625                                           | 24.7%      |
| Attention-deficit hyperactivity disorder (ADHD) | Delusions & hallucinations | 53,744             | 11,933                                           | 22.2%      |
| Attention-deficit hyperactivity disorder (ADHD) | Mood                       | 53,744             | 31,112                                           | 57.9%      |
| Attention-deficit hyperactivity disorder (ADHD) | Cognition                  | 53,744             | 18,432                                           | 34.3%      |

## Online supplementary material

eFigure 1: MindLinc EHR data de-identification and harmonization pipeline

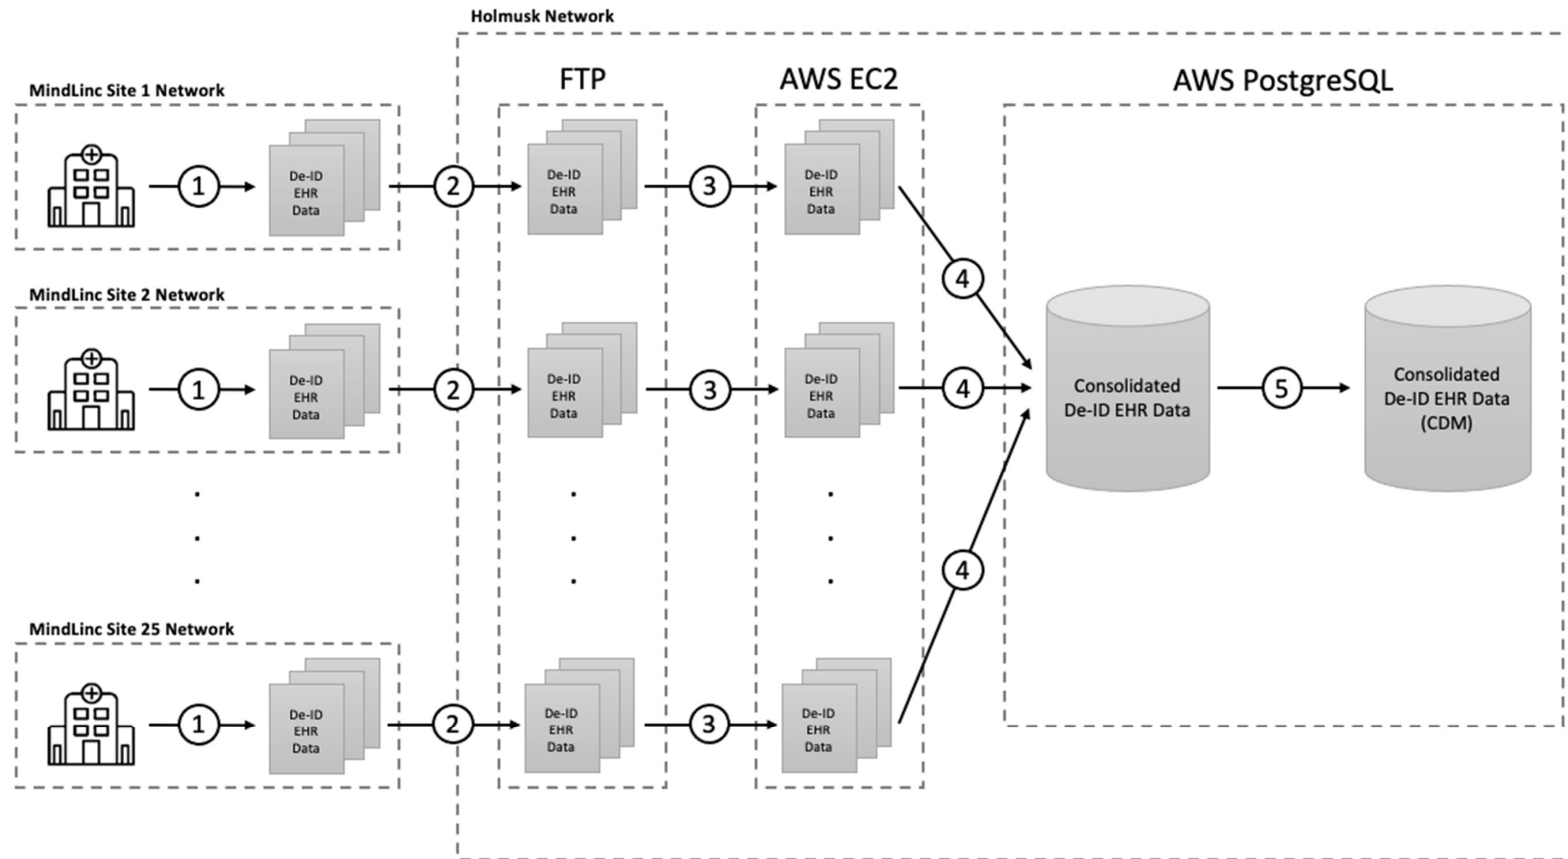

Figure: MindLinc Data Flow Diagram



## Online supplementary material

eFigure 2: OMOP CDM schematic

Source: <https://ohdsi.github.io/TheBookOfOhdsi/CommonDataModel.html>

Attribution: Creative Commons Zero v1.0 Universal license (No copyright)

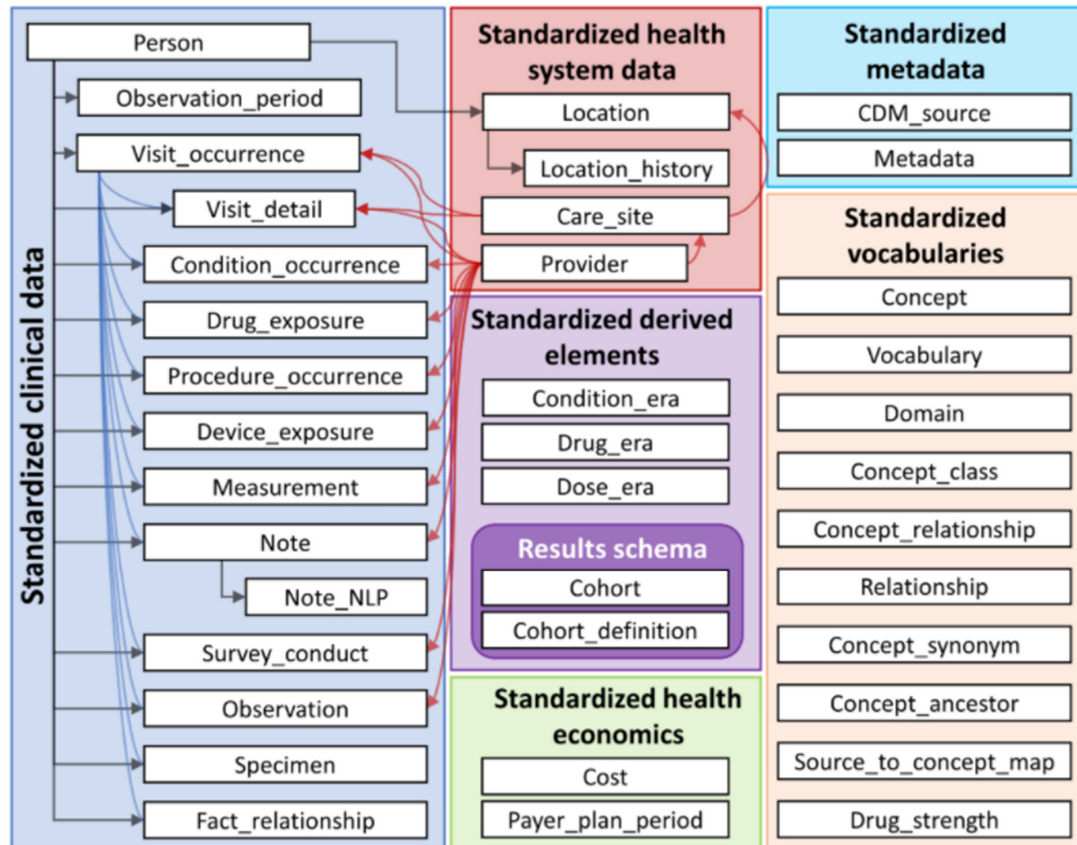

## Online supplementary material

eFigure 3: NeuroBlu Category Mapper illustrating the classification of individual drugs into different types of medication

**Drug Mappings** NeuroDB 2IR1

**MAPPED CATEGORIES**

| Category                | Count |
|-------------------------|-------|
| Analgesics              | 32    |
| Anesthetics             | 14    |
| Anti-dementia drugs     | 5     |
| Anti-parkinson drugs    | 14    |
| Anticonvulsants         | 24    |
| Antidepressants         | 34    |
| Antipsychotics          | 31    |
| Anxiolytics             | 12    |
| Hypnotics and sedatives | 16    |
| Other drugs             | 12    |
| Stimulants              | 13    |
| Substance-abuse drugs   | 6     |

**SELECTED CATEGORIES/DRUGS**

- almotriptan
- buprenorphine
- butorphanol
- diflunisal
- dihydrocodeine
- dihydroergotamine
- eletriptan
- erenumab
- ergotamine
- fentanyl
- frovatriptan
- galcanezumab
- hydromorphone
- levorphanol
- meperidine
- methadone
- methoxyflurane
- methysergide
- morphine

**ADD NEW CATEGORY**

**ADD TERM** **SAVE**

## Online supplementary material

eFigure 4: NeuroBlu Data Explorer which provides a summary of the dataset and allows the top 50 rows of each table to be viewed

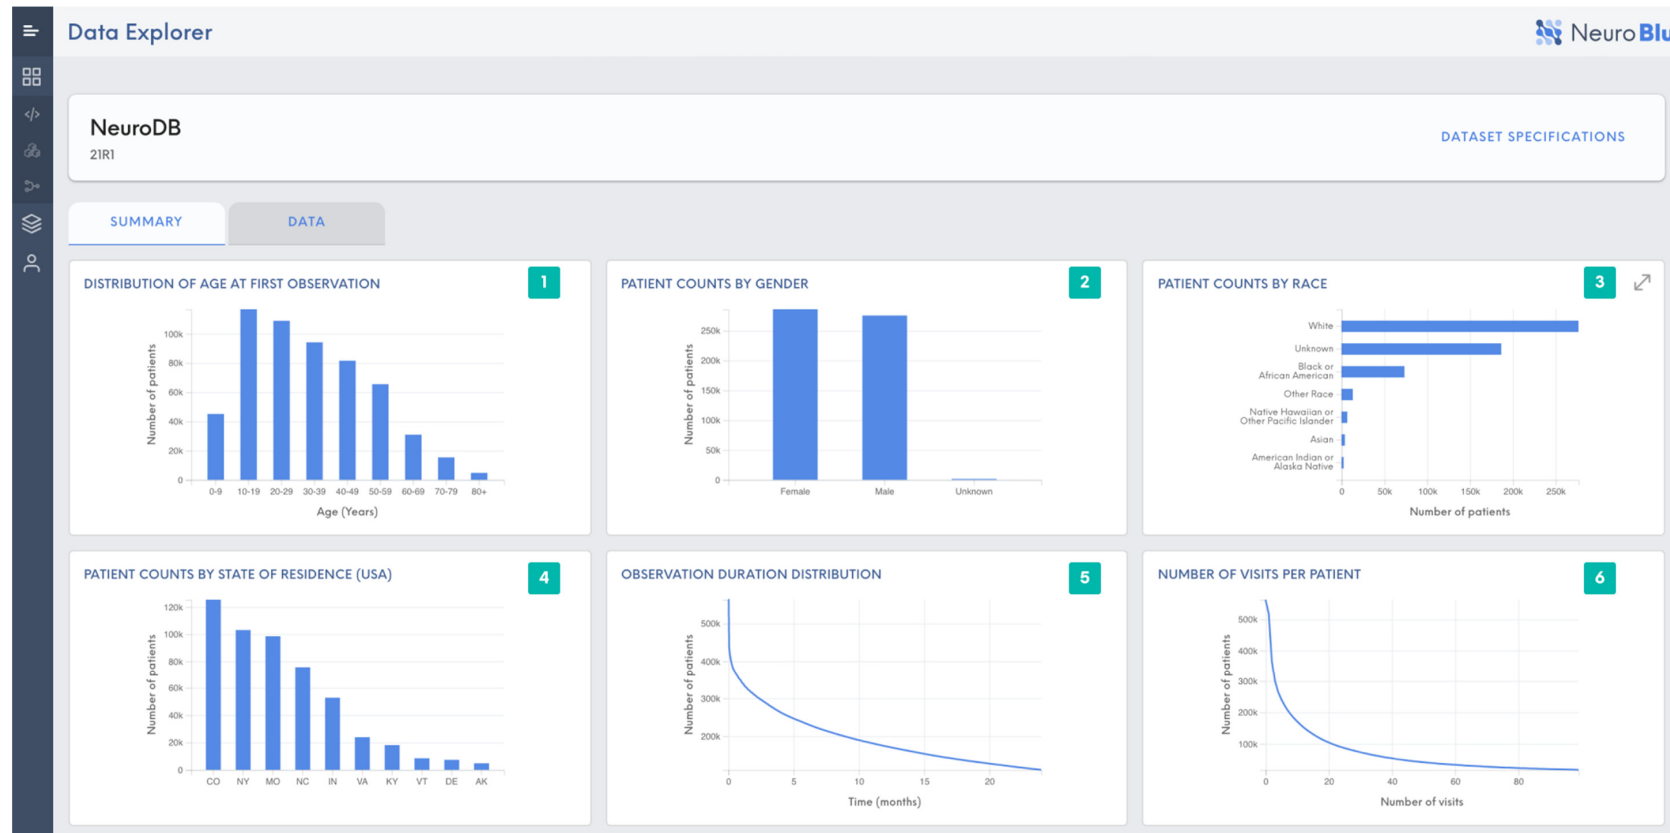

## Online supplementary material

eFigure 5: NeuroBlu dataset race distribution

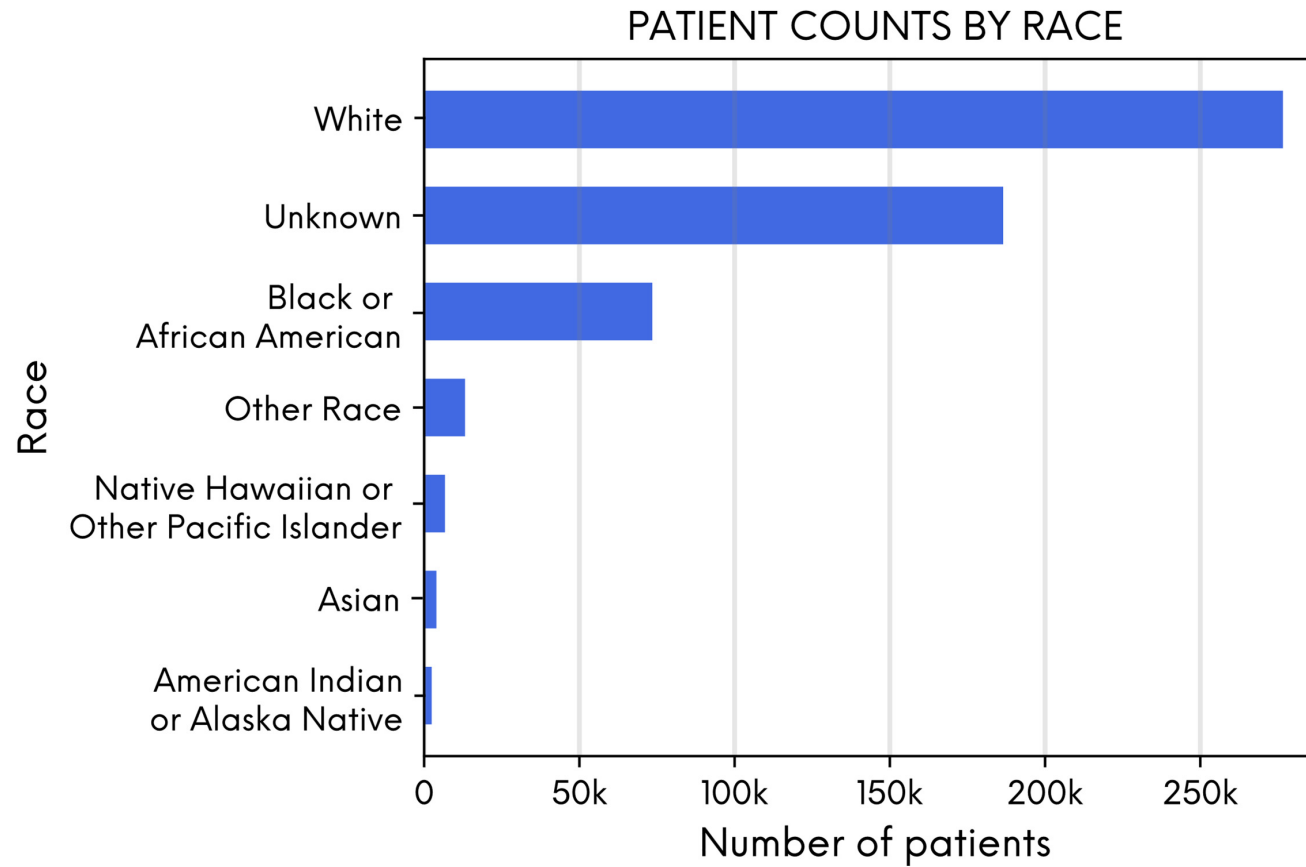

## Online supplementary material

eFigure 6: NeuroBlu dataset age distribution

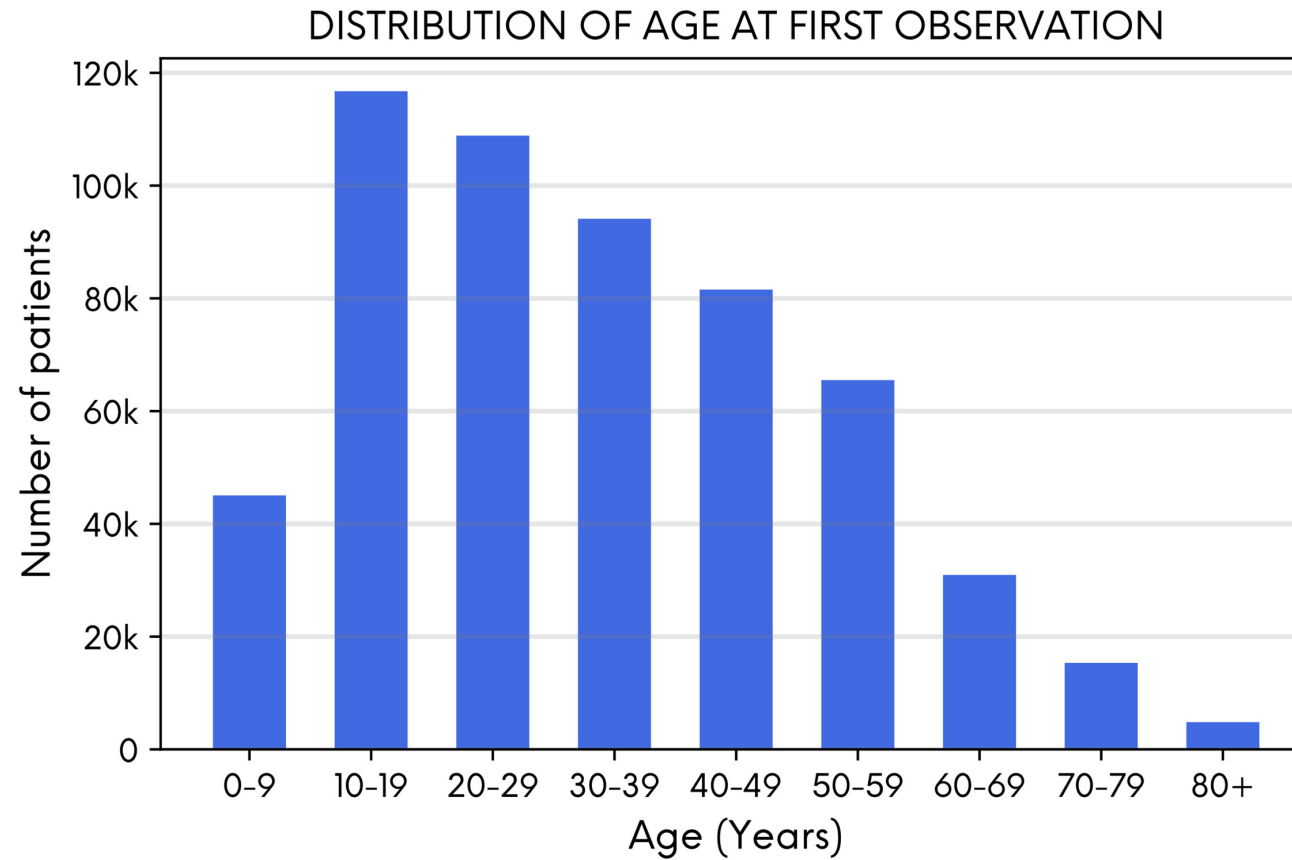

## Online supplementary material

eFigure 7: Gender distribution by diagnosis

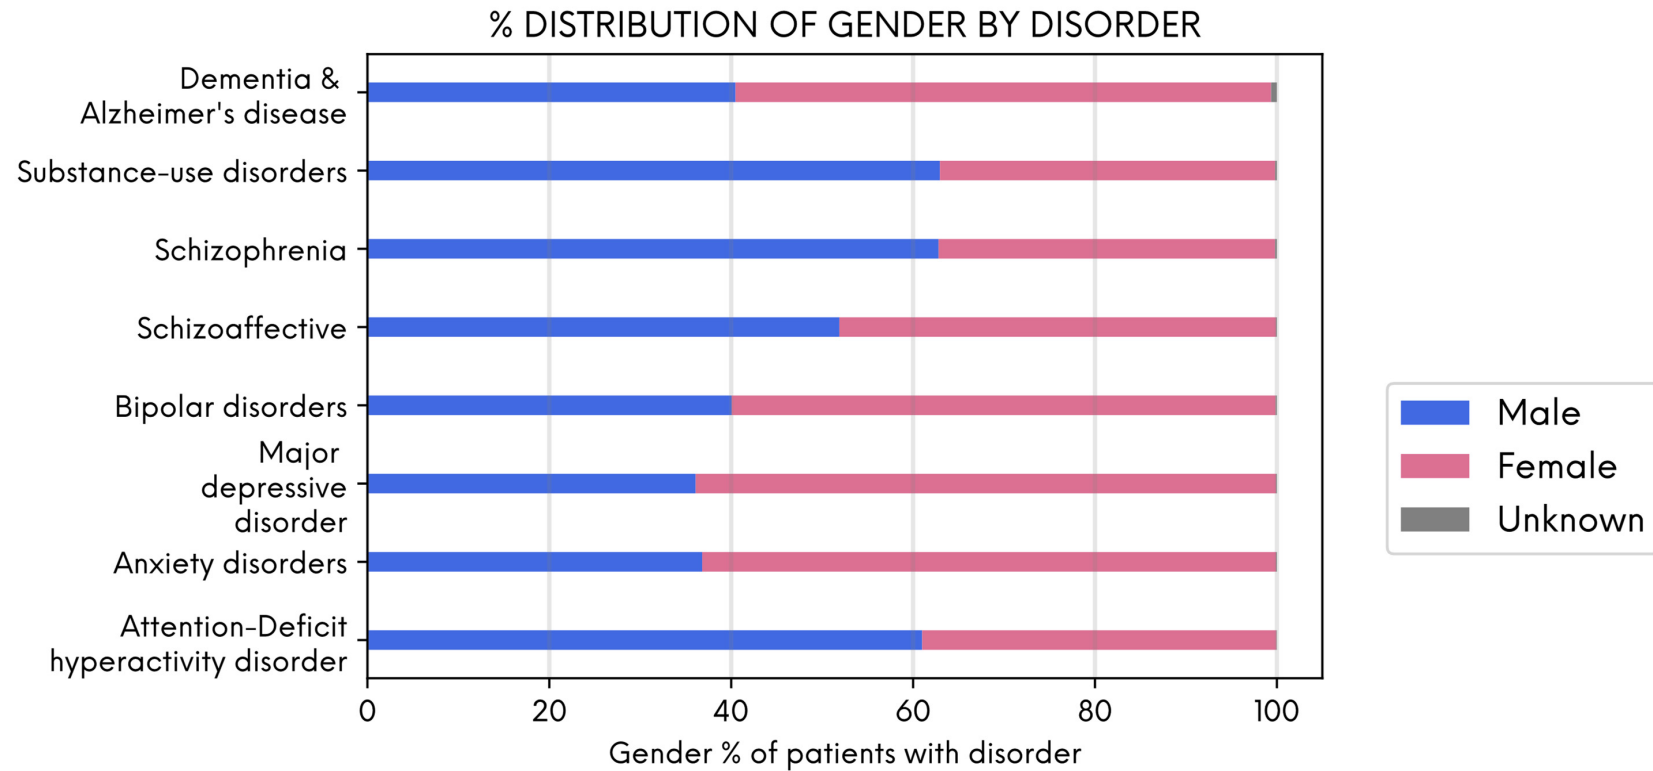

## Online supplementary material

eFigure 8: U.S. State of Residence

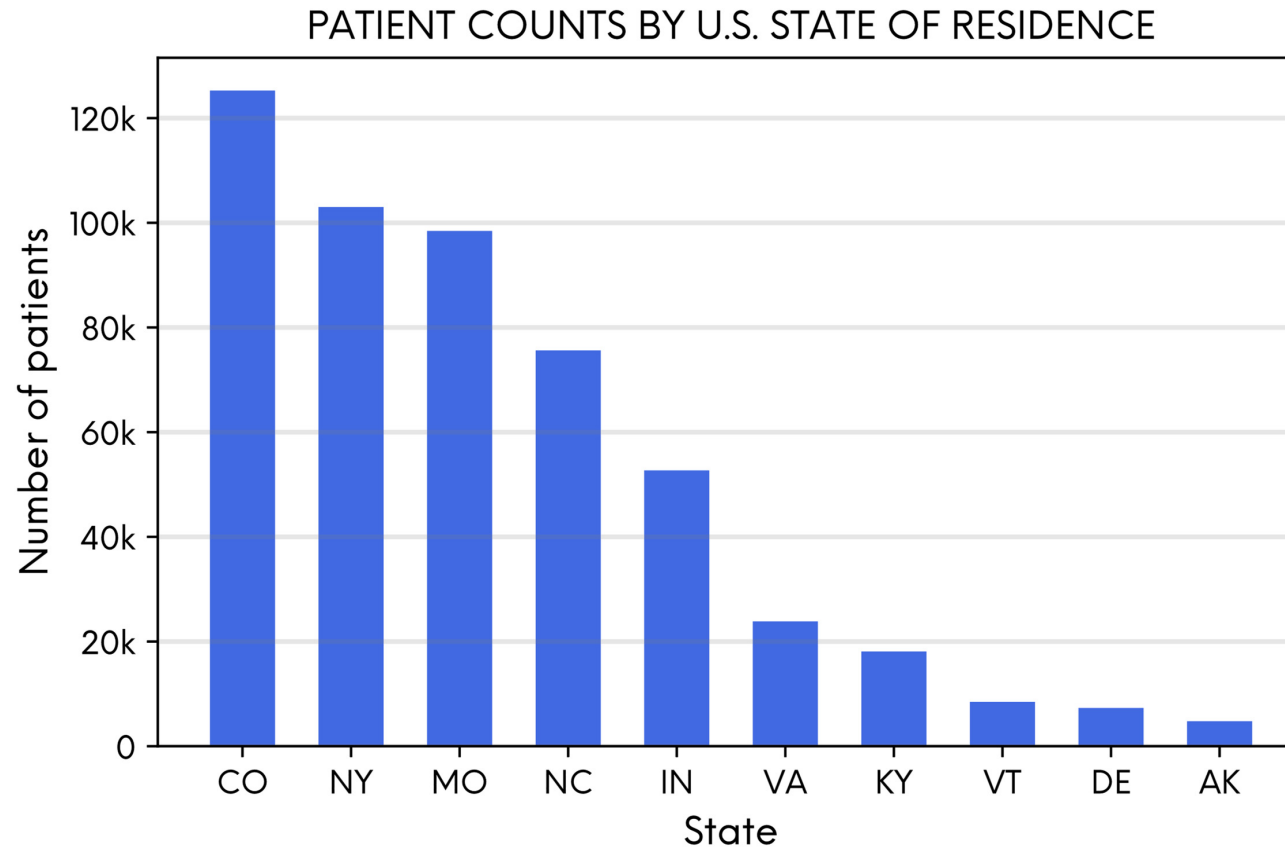

## Online supplementary material

eFigure 9: Mean CGI-S score by diagnosis

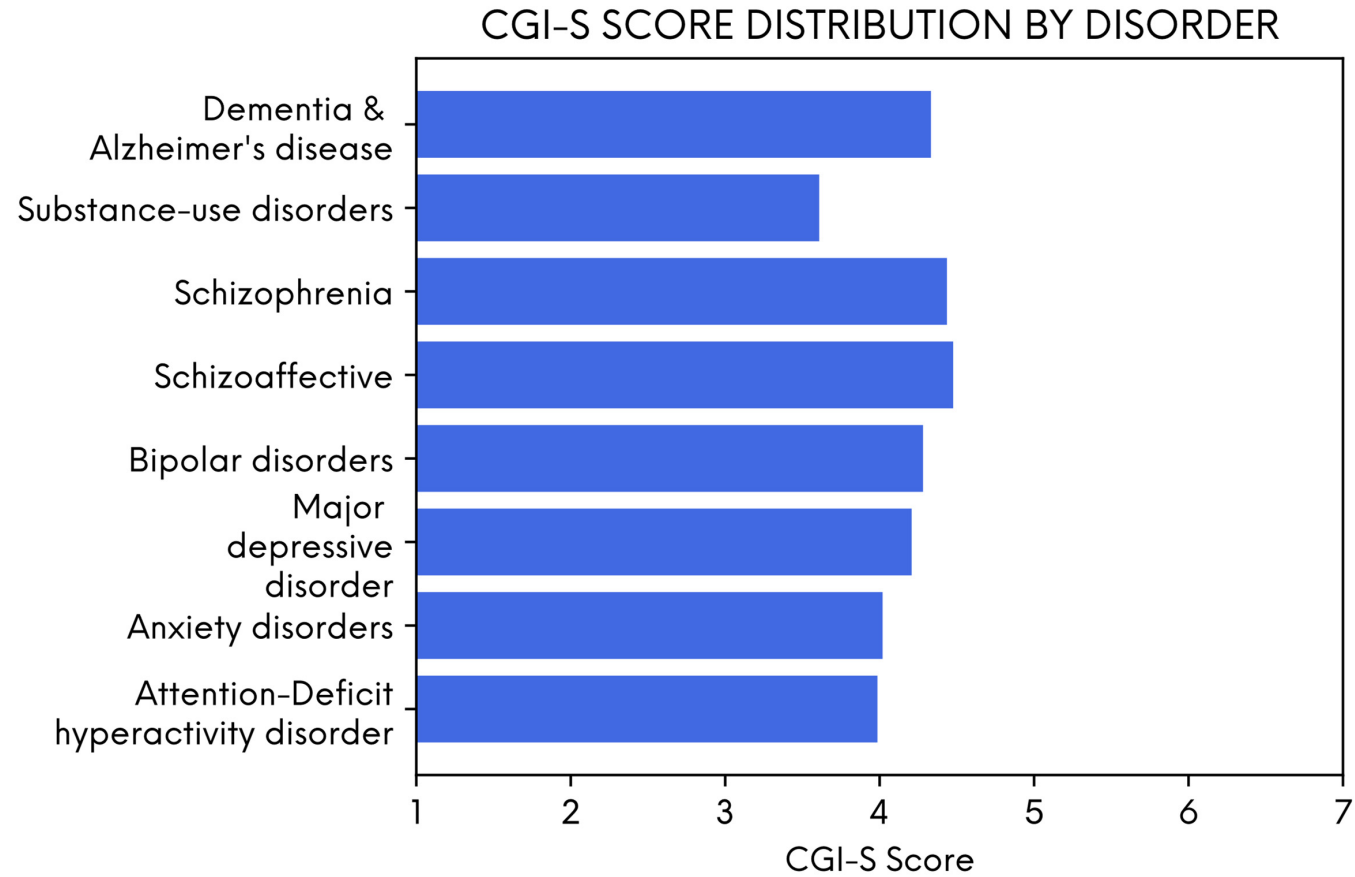



## Online supplementary material

eFigure 10: Percentage of patients with at least one hospital visit by diagnosis

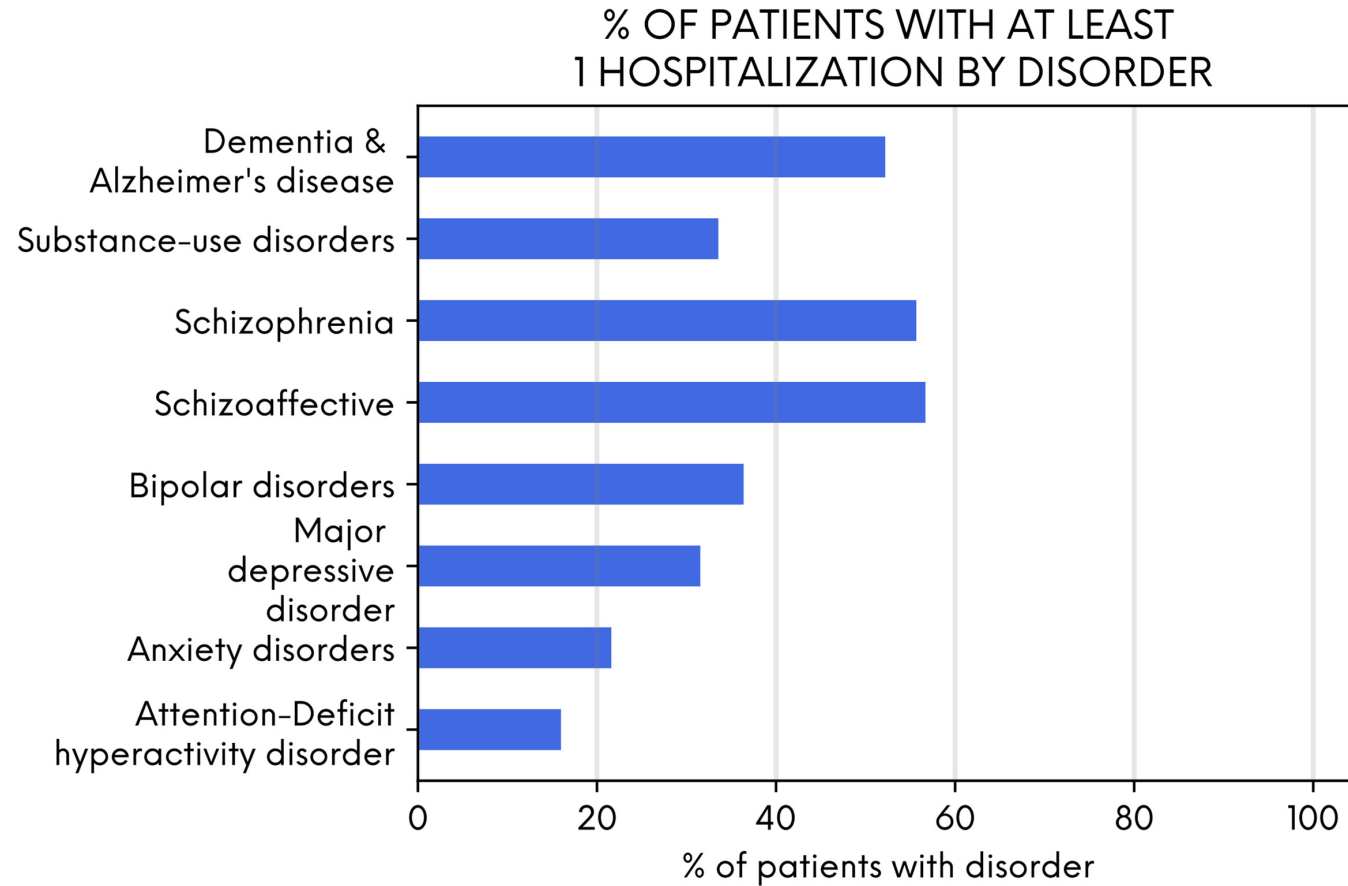

## Online supplementary material

eFigure 11: Distribution of number of visits per patient

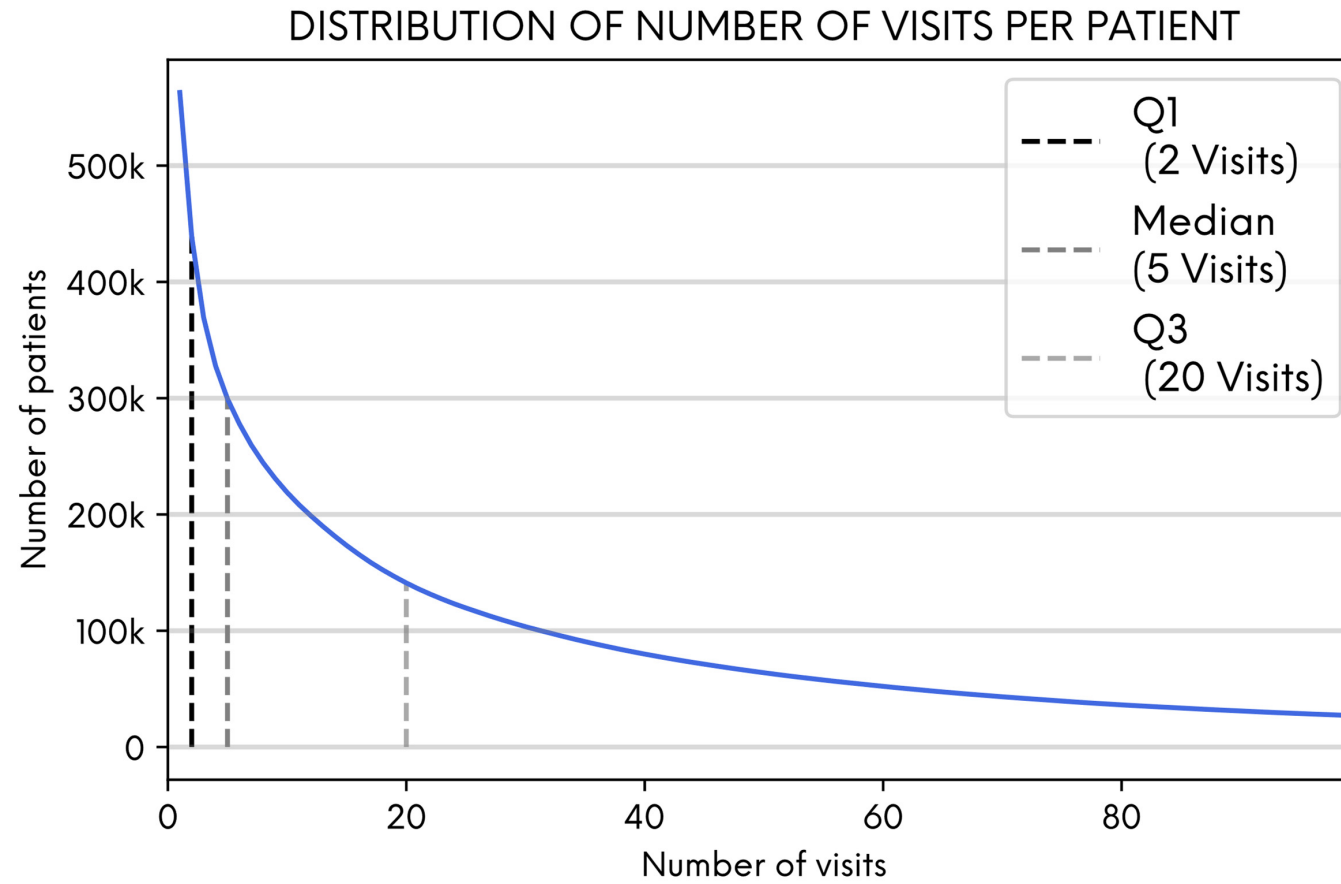

## Online supplementary material

eFigure 12: Distribution of duration of follow-up

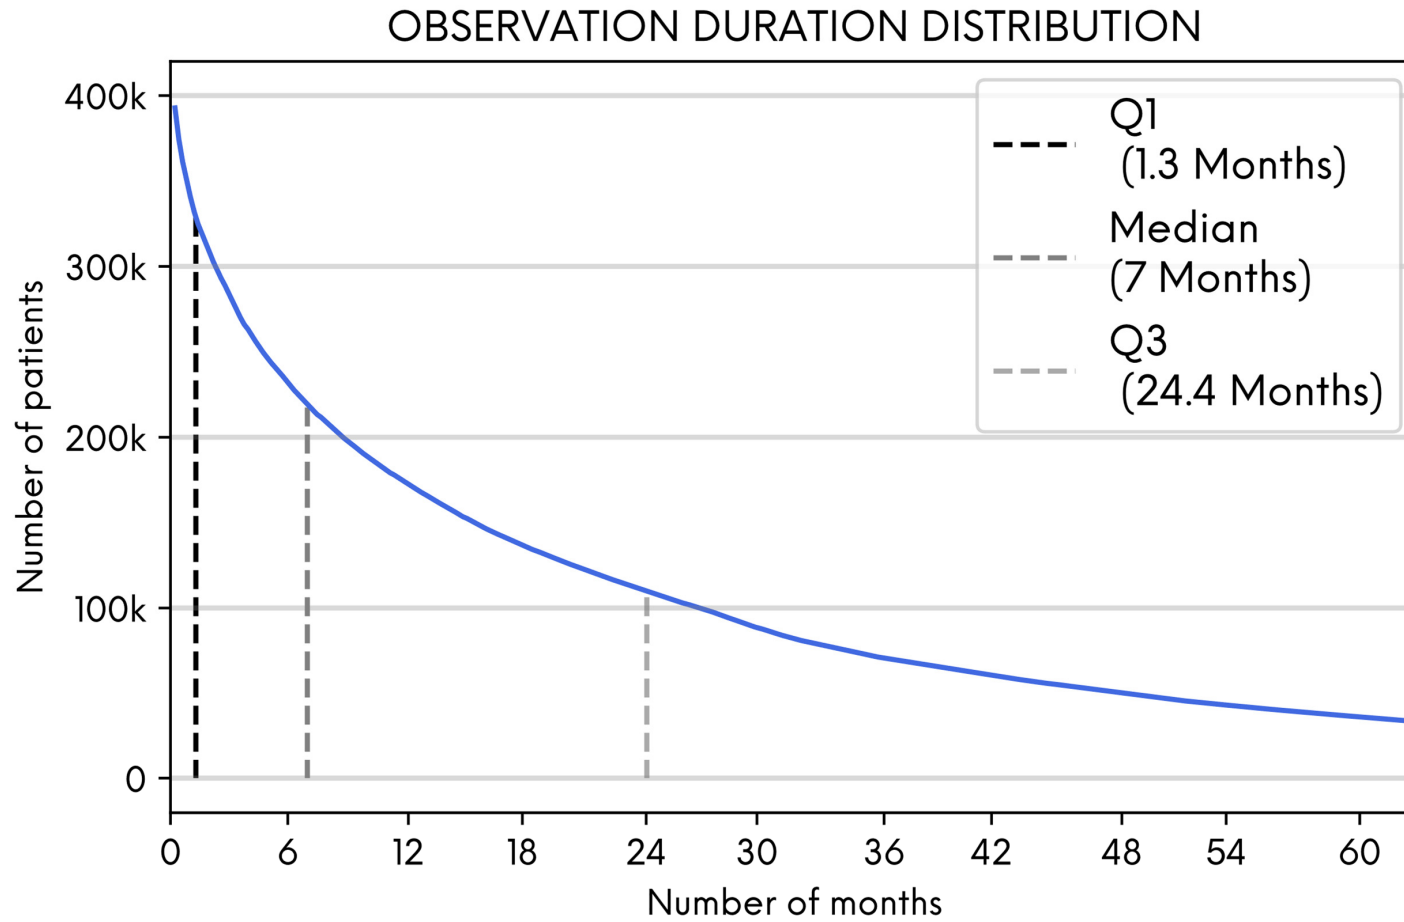

Supplement: bmjopen-2021-057227supp001_data_supplement.pdf [file bmjopen-2021-057227supp001_data_supplement.pdf]
